# Supplementary material for: A study of common Mendelian disease carriers across ageing British cohorts: meta-analyses reveal heterozygosity for alpha 1-antitrypsin deficiency increases respiratory capacity and height
Source: PubMed Central journal article supplement (PMC4819619; doi:10.1136/jmedgenet-2015-103342), 2016-02-01
Supplement: jmedgenet-2015-103342-s1.pdf [file jmedgenet-2015-103342-s1.pdf]

## **S1 Supporting Information**

### **S1 Appendix. Ethical Approval**

**BO:** Ethical approval for the clinical third wave of follow-up of Boyd Orr (2002-03) was obtained from Multi-centre Research Ethics Committee Scotland. All participants gave informed consent.

**CaPS:** Ethical approval for genotypic analyses was provided by South East Wales Local Research Ethics Committee Panel B (05/WSE02/131). The original CaPS project received ethical approval from the former South Glamorgan Area Health Authority.

**English Longitudinal Study of Ageing (ELSA):** ELSA has been approved by the National Research Ethics Service and all participants have given informed consent.

**HCS/HAS:** Ethical approval for the Hertfordshire studies was obtained from the Hertfordshire Local Research Ethics Committee.

**LBC1921:** Ethical approval for the Lothian Birth Cohort 1921 study was given by the Lothian Research Ethics Committee.

**NSHD:** Ethical approval for the NSHD data collection at 53 years was approved by the North Thames Multi-Centre Research Ethics Committee (ref. MREC 98/1/121). At 60–64 years ethical approval was obtained from the Central Manchester Local Research Ethics Committee (ref. 07/H1008/245) and the Scotland A Research Ethics Committee (ref. 08/MRE00/12).

Written informed consent was obtained from study members at each stage of data collection.

**Whitehall II:** All participants provided written consent and the University College London ethics committee approved the study.

**ALSPAC:** Ethical approval for the study was obtained from the ALSPAC Ethics and Law Committee and the Local Research Ethics Committees. Written informed consent for the study was obtained for genetic analysis.

## **S2 Appendix. Wave of outcome assessment**

**Boyd Orr (BO)(2):** Physical capability and lung function were assessed at the third wave (2002-03).

**Caerphilly Prospective Study (CaPS):** Cognitive function measures were assessed at phase III. Physical capability measures were assessed at phase V. Lung function measures were analysed from phase I where available, but were substituted with measures from phase II for those individuals who did not have valid measures at phase I but did at phase II.

**English Longitudinal Study of Ageing (ELSA)(3):** Physical capability, cognitive capability and lung function were assessed at wave 2 (2004/5).

**Hertfordshire Ageing Study (HAS) (4):** Cognitive function was assessed at wave 1 (1994/5). Grip strength was assessed at wave 1 and all other physical capability measures at wave 2. Lung function was measured at wave 2 (2003/05).

**Hertfordshire Cohort Study (HCS) (5):** Grip strength and lung function were assessed at wave 1 (1999-2004) while TUG (Timed-Up and Go) speed, walk speed, balance ability and chair rise speed were assessed at both waves 1 (1999-2004) and 2 (2004/05) with partial overlap in some tests and no overlap in others. These latter measures were combined across waves, with priority given to wave 1, and the covariates tailored as such.

**Lothian Birth Cohort 1921 (LBC1921) (6):** Physical and cognitive capability and lung function were assessed at wave 1 age 79 years.

**MRC National Survey of Health and Development (NSHD) (7):** All cognitive capability and lung function measures were taken from the 1999 wave when the study members were 53

years. All physical capability measures were taken from the 1999 wave with the exception of TUG speed, which was analysed when the study members were 60-64 years.

**Whitehall II Study (WHII) (8):** Walking speed and lung function were analysed at phase 7 (2002-04), while all cognitive outcomes were analysed at phase 5 (1997-99).

## **S3 Appendix. The derivation and harmonization of variables**

### **Physical capability**

Details of the ascertainment and harmonisation of the five measures of physical capability used in analyses are described in detail elsewhere(9) and are summarised here. The approach to harmonise chair rise times (5 or 10 rises) was to calculate chair rise speed in the current study.

Grip strength was tested in ELSA, HAS, HCS, LBC1921 AND NSHD using handheld dynamometers (the specific devices used in each study are described elsewhere (9)). The maximum measure was used in each study (extracted from 3 measures of each hand in ELSA, HAS and HCS, 3 measures of the dominant hand in LBC1921 and 2 measures in each hand in NSHD). If repeat measures were missing the existing measures were used to derive the maximum.

Standing balance was assessed in BO, CaPS, ELSA, HAS, HCS and NSHD. Owing to the heterogeneity in the way the test was administered across cohorts, the outcome used in analyses was a derived binary variable for inability to balance on one leg with eyes open for five seconds. In ELSA the tests administered were more complex as described by Cooper *et al.*(9) and we derived the outcome in the same way, namely, inability to balance in full tandem with eyes open for 5 seconds with individuals who were not progressed to the next phase of testing classed as unable. Individuals who did not complete the balance test for health reasons were classed as unable in all analyses. If tests were conducted more than once the best performance was used to derive the outcome variable.

The timed walk test was conducted in LBC1921 (6 metres as fast as possible), HAS and HCS (3 metres at normal pace), ELSA (8 feet at normal pace with 2 trials) and WHII (8 feet at

normal pace with 3 trials). To normalise the distribution and to make a higher outcome a healthier outcome, times were converted to speeds in metres per second and then averaged where repeat trials were available.

The timed get up and go test was performed in BO, HAS, HCS, CaPS and NSHD. In all cohorts, study members had to rise from a chair, walk 3 metres at a normal pace and return to a seated position in the chair. The test was repeated in BO and CaPS. Again all times were converted to speeds in metres per second and then averaged where the trial was conducted more than once.

Timed chair rises were assessed in HAS, HCS, ELSA and NSHD. All times were converted to chair rise speed in stands per second. The cohorts measured time to complete 5 or 10 chair rises as fast as possible. In ELSA, individuals under 69 years performed 10 rises while those aged 70 and over performed 5 rises. Time to complete 5 rises was measured in both age groups and this was used to derive chair rise speed.

Some physical performance measures were conducted in part of the HCS cohort in one wave and in the remaining cohort in a later wave. To maximise sample size, measures were pooled across waves and covariates were tailored according to the wave at which the outcome had been performed.

### **Cognitive capability**

The measures of cognition across the HALCyon cohorts were categorised into measures of crystallised ability and measures of fluid cognition.

### *Measures of crystallised cognitive function*

The National Adult Reading Test (NART)(10) was available in LBC1921, CaPS and NSHD. This requires study members to read aloud 50 words with irregular pronunciation and the number of words pronounced correctly is used in analyses here. NART should reflect pre-morbid IQ.

The Mill Hill vocabulary test(11) was administered in HAS and WHII. Study members had to choose the correct synonym for 33 words out of 6 multiple choice answers with increasing difficulty. The number of correct answers is used in analyses.

### *Measures of fluid cognitive function*

Semantic fluency was tested in ELSA, NSHD and WHII via a verbal or written test where study members were asked to name as many animals as possible in 1 minute. The number of unique animals named was used in analyses.

Verbal memory was tested in ELSA, NSHD and WHII via a word recall test. The numbers of words correctly recalled was used in analyses. In NSHD, we summed the total score for remembering the same 15 words in writing over three consecutive trials. The sum of two trials with a delay for the second trial for remembering 10 words verbally was analysed in ELSA. 20 words were recalled in writing in WHII.

Phonemic fluency was analysed in LBC1921 and WHII. In LBC1921, study members were given three 1 minute trials to name as many words as possible beginning with F, L and C. The total number of words is used in analyses. In WHII, study members wrote as many words as possible in 1 minute beginning with S.

Search speed was tested in ELSA (780 letters) and NSHD (600 letters) whereby participants crossed out particular letters in a large grid of letters. The number of letters searched per minute was used in analyses.

The Alice Heim 4-I test (AH4)(12) was available for analyses in CaPS, HAS and WHII. This involves 65 verbal and mathematical questions. The total score achieved in 10 minutes was used in analyses here.

Choice reaction time (FCRT) was assessed in CaPS via a computer test in which the study members had to press one of four key pads depending on which box a stimulus appeared in on screen.

Wechsler logical memory(13) was tested in LBC1921. The participants were asked to recall two stories immediately and following a delay for each. The total sum of the scores for each story were progressed to analysis.

Raven's Progressive Matrices(14) were used in LBC1921, in which study members were given 20 minutes to complete 60 multiple choice "complete the pattern" questions. The total score was used in the analysis.

### **Lung function**

We analysed Forced Expiratory Volume in 1 second (FEV1) and Forced Vital Capacity (FVC). All measures for which an unsatisfactory technique had been recorded were removed. All measures were cleaned so that values  $<0.3$  litres and  $>9$  litres were removed. Any instances for which FVC was less than FEV1 were changed to missing (both values excluded from the analysis). If a cohort provided the individual repeat trial data, the cleaning was applied to each trial; if a cohort provided a cleaned summary measure across trials, this was applied to these values.



If a study provided data from individual trials, the maximum FEV1 and the maximum FVC were derived. These could come from different trials. The FEV1/FVC ratio was derived by taking the ratio of these maxima. Individuals were only included in the analysis of lung function if they had both a maximum FEV1 and a maximum FVC. The FEV1, FVC and FEV1/FVC ratio values (derived from the maxima of repeat trials) were z-scored within cohorts to have a mean of 0 and a standard deviation of 1 using all data available.

In the Boyd Orr cohort, lung function was assessed using a compact II Vitalograph Spirometer. Up to 5 blows were conducted per study member and provided for analysis.

In CaPS, the values provided were the maximum FEV1 from 3 trials and the maximum FVC from 3 trials when the highest two valid FEV1 (and separately the highest two valid FVC) were within 100ml of each other. These were derived by Bolton *et al.* and spirometry was performed in the standing position using a McDermott spirometer(15). Values from phase 1 were preferentially used but values from phase 2 were substituted into the analysis if the phase 1 measures were missing or removed by cleaning. Covariates were tailored as such.

ELSA provided the highest technically satisfactory FEV1 reading and the highest technically satisfactory FVC reading (both in litres). These had been derived using data across 3 blows using a Vitalograph Escort spirometer.

In LBC1921, lung function was measured with 3 blows of a MicroMedical Spirometer in the sitting position without nose clips. The best FEV1 and FVC of the three blows were provided by the cohort for analysis.

In HAS, FEV1 and FVC were provided for 2 blows using a MicroMedical Micro Spirometer(4).

Lung function in HCS was measured using a MicroMedical Micro Spirometer(5). Three trials were conducted and provided for analysis.

In NSHD, lung function was measured using a MicroMedical Plus Spirometer(16), the cohort provided values as the maximum of two blows (for FEV1 and FVC separately) when the difference between trials was less than or equal to 0.30 L. If the study member only had one valid measure they were excluded from analyses. Biologically unfeasible values (<0.30L or >9L) and individuals regarded as having an unsatisfactory technique were removed before deriving the maxima.

Lung function was measured in WHII using a MicroMedical Micro Plus Spirometer. Each study member attempted three blows which were provided for analysis.

### **Height, weight and BMI**

Standing height (cm), weight (kg) and Body Mass Index (BMI,  $\text{kg/m}^2$ ) were included in analyses. In CaPS, height was taken from phase 1 and replaced with height from phase 2 if the phase 1 measure was missing. For the PI-height analyses, a tailored age variable for the wave at which height was assessed was derived. In Boyd Orr, height, weight and BMI were analysed from the clinic sample.

### **Age and smoking covariates**

Individuals aged 90 years or over are not assigned an exact age in ELSA data releases. As such, we estimated the age of these individuals using a representative estimate of the mean age of individuals aged 90 and over in England and Wales in 2005 (the year of wave 2 assessment). To calculate this estimate, we used the England and Wales Mid-Year Population Estimates of the Very Elderly, 2002-2010, demographic table “Mid-2010 Estimates of the very elderly (including centenarians) England and Wales; estimated resident population”

which was part of the Population Estimates of the Very Elderly, 2010 Office for National Statistics release (release date 29 September 2011, date accessed 5 February 2014 from <http://www.ons.gov.uk/ons/publications/re-reference-tables.html?edition=tcm%3A77-223697>). The estimated age used in analyses was 92.62 years. These individuals were not included in analyses of lung function or anthropometry.

Smoking status was defined as current, ex or never smoker; pipe and cigar smoking was included if this information was available.

## **S4 Appendix. Sensitivity analyses**

The association between PI-MZ and lung function was repeated (basic model, height adjusted model) with FEV1 and FVC values outside  $\pm 3$  standard deviations removed within cohorts before z-scoring to explore the robustness of the coefficient estimates to extreme values, S8 and S21 Tables. This was also implemented for the PI-MZ and height associations (basic model, lung function adjusted model) and the PI-MZ and weight association (S28, S30 and S32 Tables).

We repeated the basic PI-MZ vs PI-MM random effects models against FEV1, FVC and height using restricted maximum likelihood rather than the default maximum likelihood. This made negligible difference to the fixed effects estimates and p-values, while the variance of the random carrier effect was still immaterial.

The distribution of the raw, standardised and studentised residuals were reviewed from the fixed-effects analyses to examine the normality of the distribution. The residuals versus the fitted values were examined for all models suggestive of an association to check for independence. The fixed effects linear model of PI-MZ and z-scored FEV1 suggested that the variance of the residuals increased slightly with the fitted values, but a transformation of the outcome would not remediate this. The distribution of the residuals of FEV1 tended to have a fat tail for negative residuals, for which there was no appropriate transformation.

We repeated the fixed effects analysis of PI-MZ vs MM against z-scored FEV1 and FVC (age and sex adjusted) with robust standard errors, which do not assume that the residuals in the model are identically distributed. The regression coefficients do not change with this approach but the updated 95% confidence intervals were (0.07, 0.19) for FEV1 and (0.10, 0.22) for FVC. The p-values were very slightly attenuated.

We considered whether the variance in lung function (z-scored FEV1 and FVC, square-root transformed and z-scored FVC) differed across PI classes and in deltaF508 carriers vs non-

carriers (FVC), in addition to whether the variance in height (cm) differed across PI classes by pooling the data across cohorts and using Levene's test (S47 Table). This revealed that there was evidence for a difference in the variance of FEV1 and FVC in PI-MZ vs MM (greater variance in PI-MZ). However, the difference was reasonably small (difference of 0.06 in the standard deviation of pooled z-scored FEV1 and difference of 0.08 in the standard deviation of pooled z-scored FVC).

To account for the unequal variance in PI-MZ vs PI-MM, we repeated the basic fixed effects model (age and sex adjusted) with z-scored FEV1 and FVC within a mixed effects framework, enforcing heteroskedastic residuals by genotype rather than by cohort (so the only random component of the model is the clustering of residuals by genotype). The effect estimates were unchanged but the p-values were slightly attenuated ( $p=2.6 \times 10^{-5}$  (FEV1) and  $p=1.3 \times 10^{-7}$  (FVC)).

We considered influential observations for the associations of interest. These were (1) PI-MZ vs MM and FEV1 (basic and height, height-squared adjusted models) (2) PI-MZ vs MM and FVC (basic and height, height-squared adjusted models) (3) PI-MZ vs MM and height (basic and lung function adjusted models) (4) PI-MZ vs MM and natural log transformed weight (5) deltaF508 carrier status (height, height-squared adjusted) and FVC and (6) PI-MZ vs MM and grip strength. We calculated the dfbeta statistics from the fixed effects meta-analyses. These calculate by how many standard errors the regression coefficient would change if a single observation were omitted. This confirmed that no observations had a dfbeta value with magnitude greater than or equal to 1, such that no single observation affected the coefficient estimate by more than one standard error. However, we did note that the usual threshold of  $2/\sqrt{\text{sample size}}$  (1) was extremely sensitive and identified >60% of the mutation carriers for each regression. Owing to the large sample size (>14,000 observations for all analyses except the grip strength analysis which included >10,000 individuals), this

identified observations which changed the coefficients by approximately 0.017-0.02 standard errors. Given the small standard errors in these associations, this identified observations which changed the regression coefficient by only a small amount. A summary of the range of dfbeta values by analysis is provided in S48 Table. We repeated these associations removing the top and bottom 30 individuals with the most extreme dfbeta values. This suggested an increase in the magnitude of the association of PI-MZ with FEV1 and height.

It was noted on examination of the residual versus fitted plots from the fixed effects meta-analyses that when FEV1 or (FEV1/FVC ratio)<sup>3</sup> were analysed, on some occasions there was a bias in the residuals from individuals in ELSA who have COPD (i.e. a very small number of individuals, but this could be detected from the plots). The basic analysis of PI-MZ vs PI-MM against FEV1 was repeated excluding ELSA individuals with COPD. The updated regression coefficient was 0.13 (95% CI: 0.08, 0.19) and was 0.07 (95% CI: 0.01, 0.12) for the height, height-squared adjusted model. We repeated the fixed effects analysis of PI-MZ vs PI-MM with height, excluding Boyd Orr due to the comparatively large effect estimate in this cohort. The regression coefficient was 1.45 cm (0.98cm, 1.92cm).

**S1 Fig. EHH analysis of rs28929474 and rs17580 and neighbouring SNPs.** A) Core haplotype involves rs28929474, rs1802959, rs28929471 and rs17580. B) Core haplotype involves rs1303, rs28929473, rs28929474, rs28929474, rs1802959, rs28929471, rs17580, rs28929472 and rs28929470.

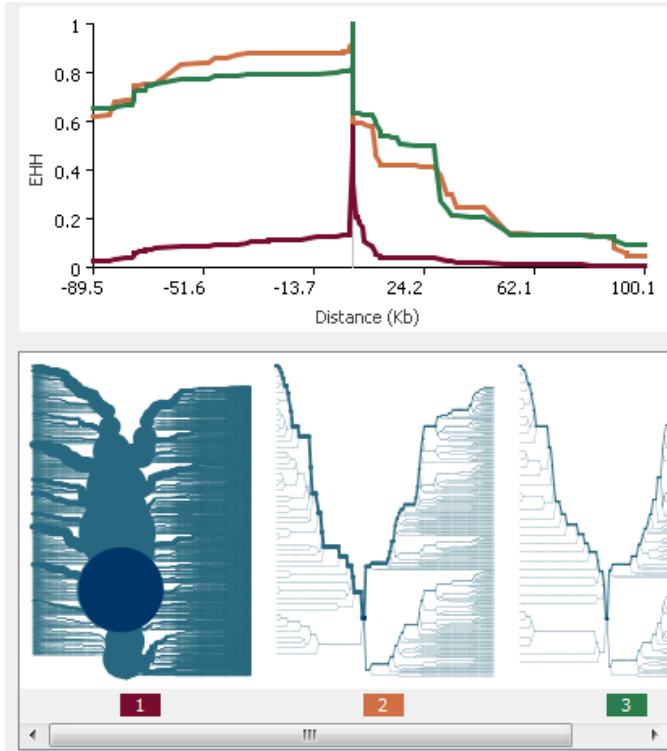

A)

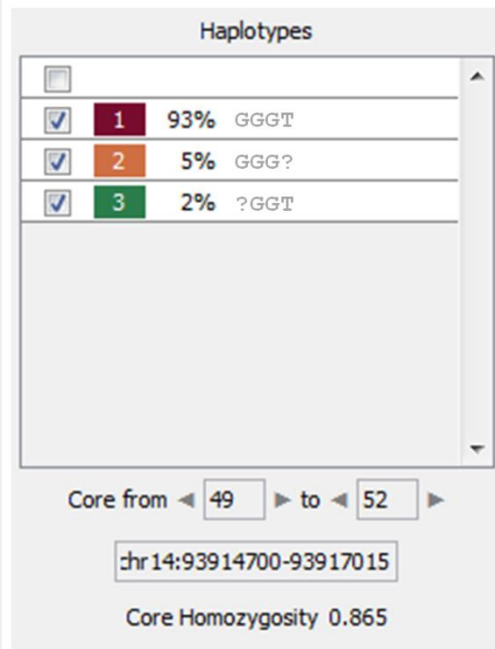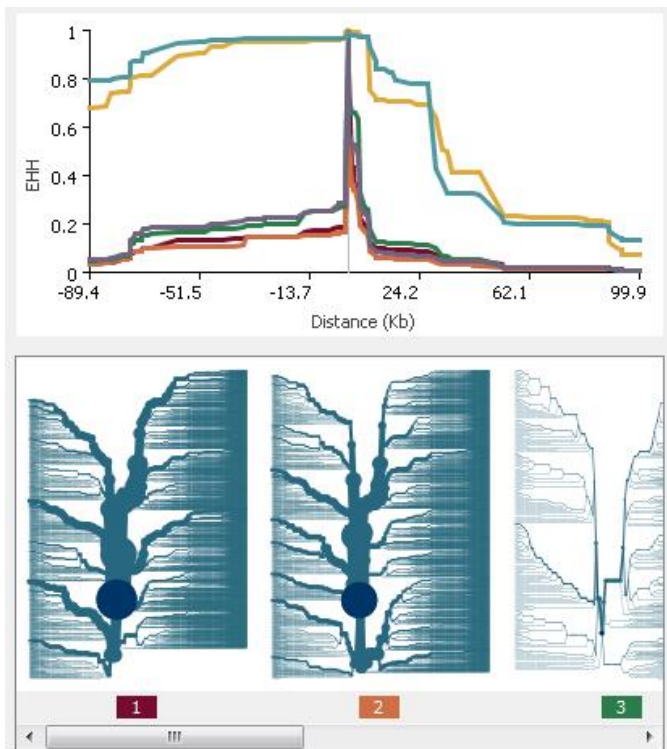

B)

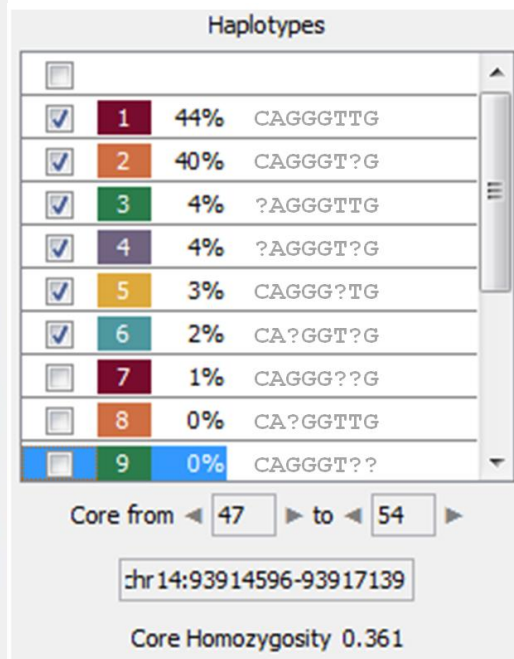

**S2 Fig. Results observed from the web tool Haplotter <http://haplotter.uchicago.edu/>.**

Signatures of recent selection for the SERPINA1 gene and surrounding region (2Mb) have been tested using four different approaches: iHS, Fay and Wu's H, Tajima's D and  $F_{st}$ .

According to the thresholds described in the literature for each test, there was no evidence of selection involving common SNPs in any case.



# Gene name: **SERPINA1** ID: **5265**

chromosome 14 [92834751:92845165]

-1 Mb | +1 Mb

## iHS

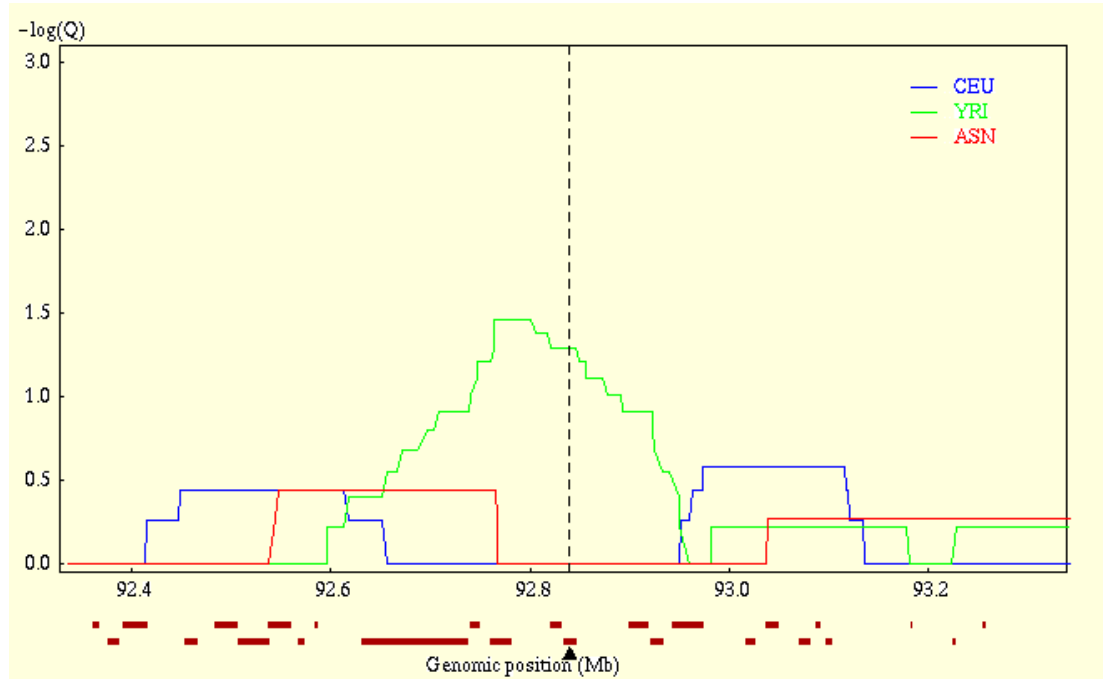

## H

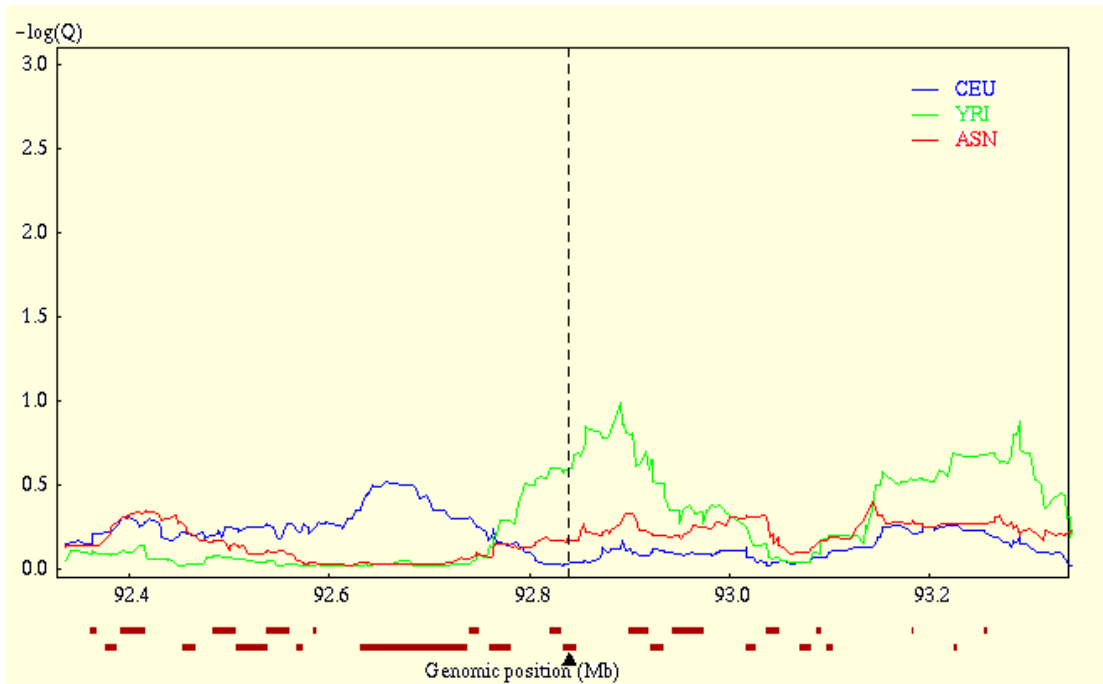

### D

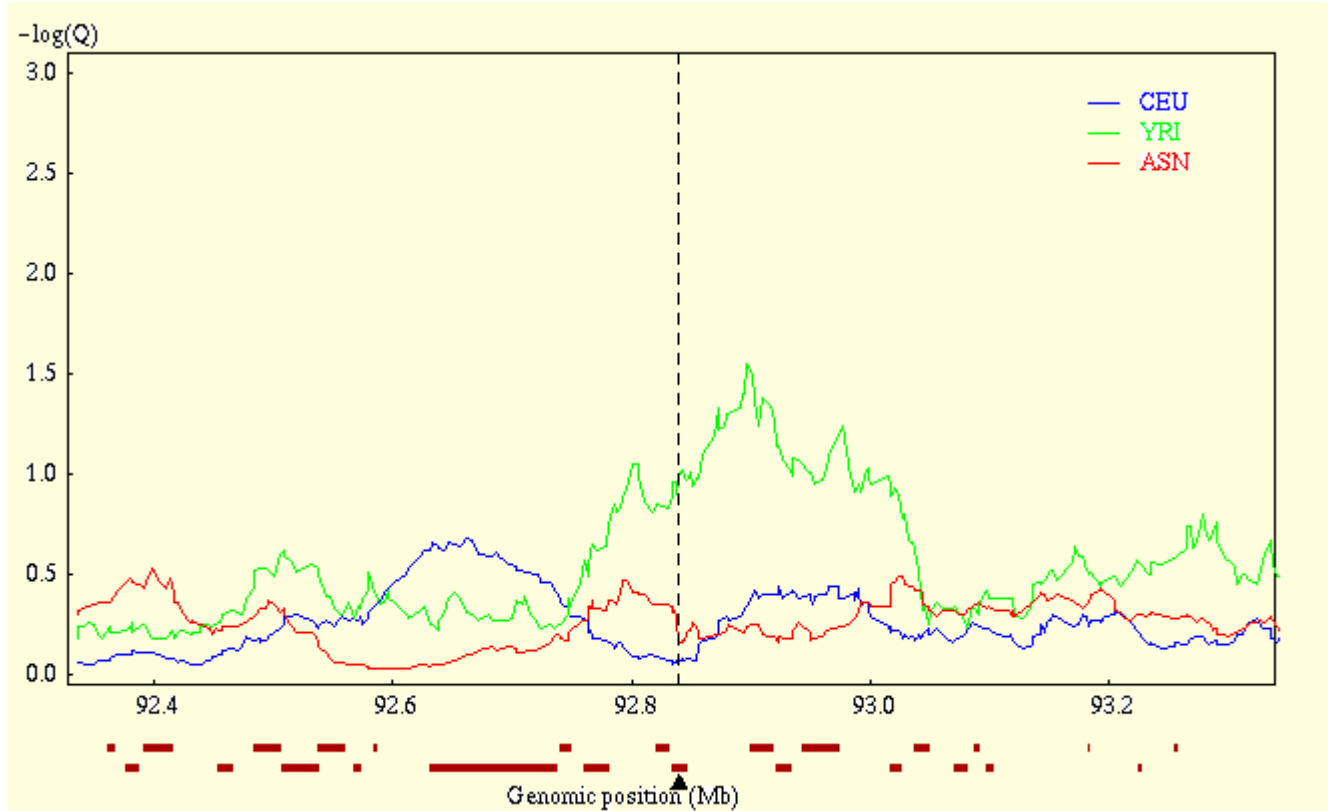

### Fst

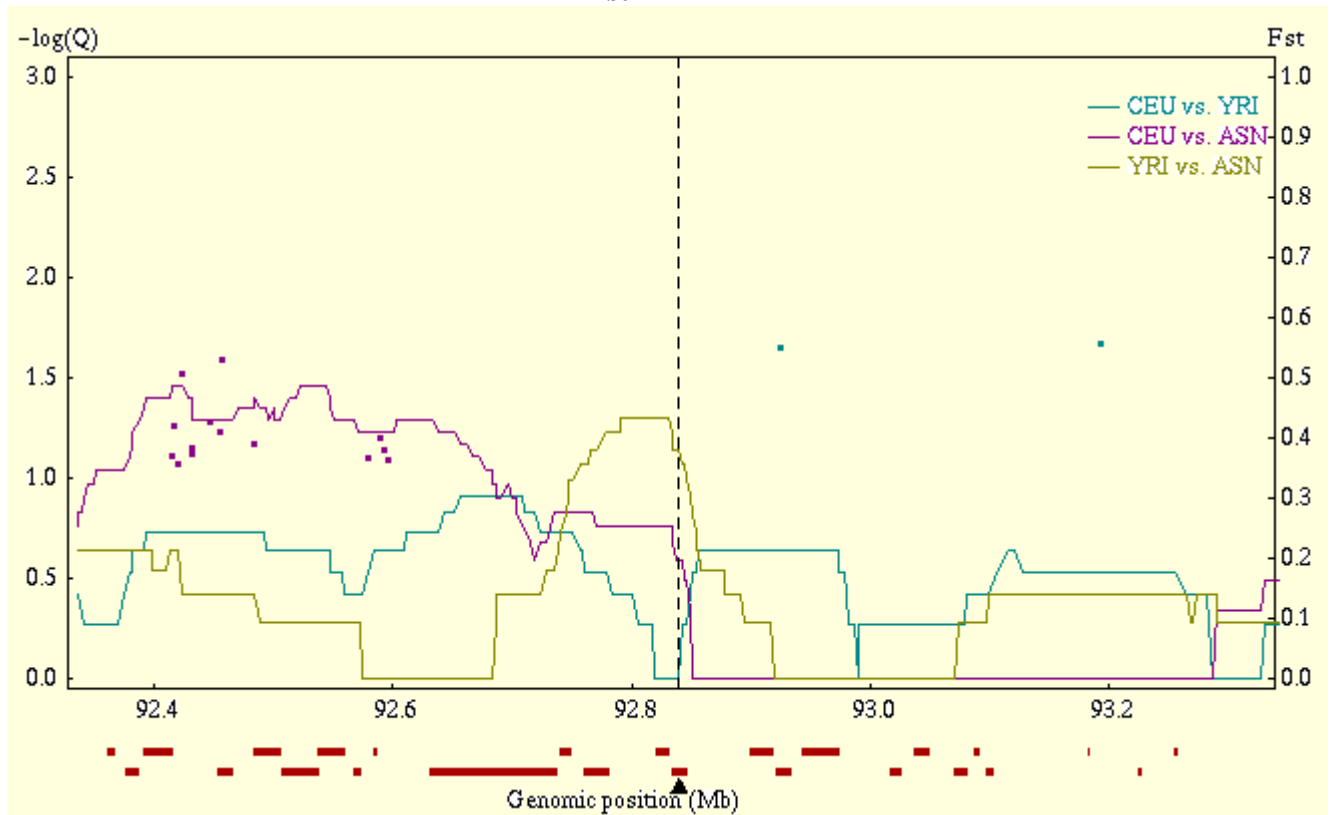

### Genes in the region

| Gene ID | Name                      | Region              | CEU                      | YRI                      | ASN                      |
|---------|---------------------------|---------------------|--------------------------|--------------------------|--------------------------|
| 90050   | <a href="#">C14orf152</a> | 92375299 - 92385985 | <a href="#">0.999955</a> | <a href="#">0.999955</a> | <a href="#">0.999954</a> |
| 51676   | <a href="#">ASB2</a>      | 92390554 - 92413808 | <a href="#">0.999955</a> | <a href="#">0.999955</a> | <a href="#">0.999954</a> |
| 256369  | <a href="#">C14orf48</a>  | 92453683 - 92465250 | <a href="#">0.351631</a> | <a href="#">0.999955</a> | <a href="#">0.999954</a> |
| 78990   | <a href="#">OTUB2</a>     | 92482765 - 92505317 | <a href="#">0.351631</a> | <a href="#">0.999955</a> | <a href="#">0.999954</a> |
| 57062   | <a href="#">DDX24</a>     | 92507309 - 92537599 | <a href="#">0.351631</a> | <a href="#">0.999955</a> | <a href="#">0.999954</a> |
| 122509  | <a href="#">FAM14B</a>    | 92537716 - 92559096 | <a href="#">0.351631</a> | <a href="#">0.999955</a> | <a href="#">0.359281</a> |
| 3429    | <a href="#">IFI27</a>     | 92568017 - 92573073 | <a href="#">0.351631</a> | <a href="#">0.999955</a> | <a href="#">0.359281</a> |
| 83982   | <a href="#">FAM14A</a>    | 92584162 - 92585964 | <a href="#">0.351631</a> | -                        | <a href="#">0.359281</a> |
| 57718   | <a href="#">KIAA1622</a>  | 92630690 - 92736113 | <a href="#">0.999955</a> | <a href="#">0.225666</a> | <a href="#">0.359281</a> |
| 51156   | <a href="#">SERPINA10</a> | 92739691 - 92749402 | <a href="#">0.999955</a> | <a href="#">0.063964</a> | <a href="#">0.359281</a> |
| 866     | <a href="#">SERPINA6</a>  | 92760627 - 92779714 | <a href="#">0.999955</a> | <a href="#">0.036685</a> | <a href="#">0.999954</a> |
| 390502  | <a href="#">SERPINA2</a>  | 92820692 - 92830320 | <a href="#">0.999955</a> | <a href="#">0.052676</a> | <a href="#">0.999954</a> |
| 5265    | <a href="#">SERPINA1</a>  | 92834751 - 92845165 | <a href="#">0.999955</a> | <a href="#">0.052676</a> | <a href="#">0.999954</a> |
| 256394  | <a href="#">SERPINA11</a> | 92898844 - 92917877 | <a href="#">0.999955</a> | <a href="#">0.132766</a> | <a href="#">0.999954</a> |
| 327657  | <a href="#">SERPINA9</a>  | 92921004 - 92932711 | <a href="#">0.999955</a> | <a href="#">0.170705</a> | <a href="#">0.999954</a> |
| 145264  | <a href="#">SERPINA12</a> | 92943661 - 92974222 | <a href="#">0.541838</a> | <a href="#">0.999955</a> | <a href="#">0.999954</a> |
| 5267    | <a href="#">SERPINA4</a>  | 93017824 - 93026284 | <a href="#">0.252749</a> | <a href="#">0.607928</a> | <a href="#">0.999954</a> |
| 5104    | <a href="#">SERPINA5</a>  | 93037852 - 93049493 | <a href="#">0.252749</a> | <a href="#">0.607928</a> | <a href="#">0.539616</a> |
| 12      | <a href="#">SERPINA3</a>  | 93070812 - 93080432 | <a href="#">0.252749</a> | <a href="#">0.607928</a> | <a href="#">0.539616</a> |
| 390503  | <a href="#">LOC390503</a> | 93088276 - 93090906 | <a href="#">0.252749</a> | <a href="#">0.607928</a> | <a href="#">0.539616</a> |
| 388007  | <a href="#">SERPINA13</a> | 93097103 - 93103372 | <a href="#">0.252749</a> | <a href="#">0.607928</a> | <a href="#">0.539616</a> |
| 145259  | <a href="#">LAMR1P4</a>   | 93182590 - 93183619 | <a href="#">0.999955</a> | <a href="#">0.999955</a> | <a href="#">0.539616</a> |

**S3 Fig. Estimation of the number of generations ( $n$ ) computed from the proportion of haplotypes not recombined ( $X$ ). Each point corresponds to a pairwise combination involving rs28929474 and neighbouring SNPs at a distance ranging from 104 bp to 224 Kb.**

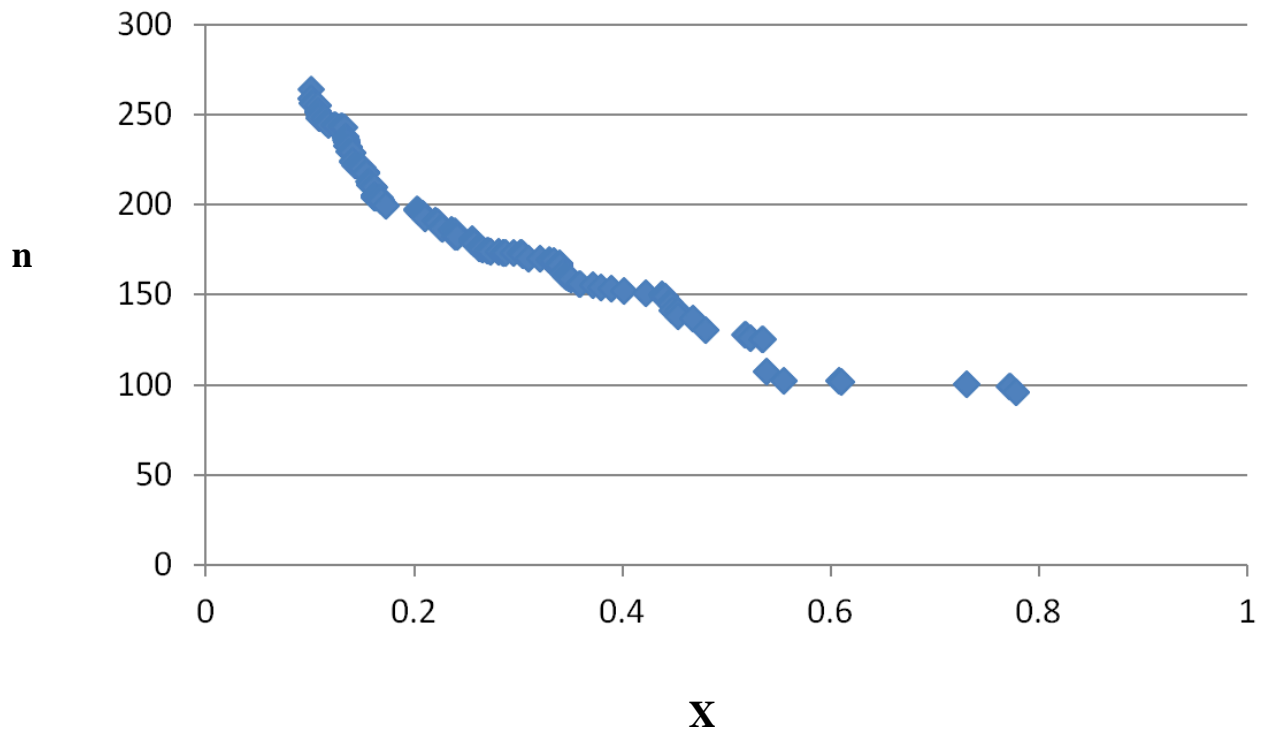

**S1 Table. Genotyping Quality**

| Analysis                       | Cohort  | SNP        | Call rate (%) | Duplicate concordance rate (%) |
|--------------------------------|---------|------------|---------------|--------------------------------|
| Alpha 1-antitrypsin deficiency | BO      | rs28929474 | 99.9          | 100                            |
|                                | CaPS    |            | 99.2          | 100                            |
|                                | ELSA    |            | 98.8          | 100                            |
|                                | LBC1921 |            | 98.6          | 100                            |
|                                | HAS     |            | 94.0          | Not available                  |
|                                | HCS     |            | 98.1          | Not available                  |
|                                | NSHD    |            | N/A           | N/A                            |
|                                | WHII    |            | 99.1          | 100                            |
|                                | BO      | rs17580    | 97.2          | 100                            |
|                                | CaPS    |            | 94.5          | 100                            |
| ELSA                           |         | 98.0       | 99.9          |                                |
| LBC1921                        |         | 96.3       | 100           |                                |
| HAS/HCS                        |         | 98.1       | Not available |                                |
| NSHD                           |         | N/A        | N/A           |                                |

|                 |         |             |      |               |
|-----------------|---------|-------------|------|---------------|
|                 | WHII    |             | 99.2 | 100           |
| Cystic fibrosis | BO      | rs113993960 | 99.6 | 100           |
|                 | CaPS    |             | 98.3 | 100           |
|                 | ELSA    |             | 99.8 | 100           |
|                 | LBC1921 |             | 98.3 | 100           |
|                 | HAS/HCS |             | 98.4 | Not available |
|                 | NSHD    |             | 99.0 | 100           |
|                 | WHII    |             | 99.4 | 100           |
| Phenylketonuria | BO      | rs5030858   | 99.5 | 100           |
|                 | CaPS    |             | 99.7 | 100           |
|                 | ELSA    |             | 99.2 | 100           |
|                 | LBC1921 |             | 99.3 | 100           |
|                 | HAS/HCS |             | 98.5 | Not available |
|                 | NSHD    |             | 99.2 | 100           |
|                 | WHII    |             | 99.1 | 100           |
|                 | BO      | rs5030861   | 99.9 | 100           |
|                 | CaPS    |             | 99.6 | 100           |

|                                                |         |            |      |               |
|------------------------------------------------|---------|------------|------|---------------|
|                                                | ELSA    |            | 99.2 | 100           |
|                                                | LBC1921 |            | 98.6 | 100           |
|                                                | HAS/HCS |            | 97.8 | Not available |
|                                                | NSHD    |            | 99.0 | N/A           |
|                                                | WHII    |            | 98.6 | 100           |
|                                                | BO      | rs75193786 | 99.2 | 100           |
|                                                | CaPS    |            | 98.4 | 100           |
|                                                | ELSA    |            | 99.4 | 100           |
|                                                | LBC1921 |            | 98.6 | 100           |
|                                                | HAS/HCS |            | 97.5 | Not available |
|                                                | NSHD    |            | 97.8 | N/A           |
|                                                | WHII    |            | 99.1 | 100           |
| Medium chain acyl-coA dehydrogenase deficiency | BO      | rs77931234 | 99.6 | 100           |
|                                                | CaPS    |            | 98.8 | 100           |
|                                                | ELSA    |            | 99.4 | 100           |

|  |         |  |      |               |
|--|---------|--|------|---------------|
|  | LBC1921 |  | 97.0 | 100           |
|  | HAS/HCS |  | 97.8 | Not available |
|  | NSHD    |  | 98.9 | 100           |
|  | WHII    |  | 98.4 | 100           |



**S2 Table. Sample size by analysis**

| Outcome            | Covariates      | Genetic exposure  | Number of carriers | Number of non-carriers | Total sample size analysed |
|--------------------|-----------------|-------------------|--------------------|------------------------|----------------------------|
| weight             | age,sex         | PI-MS vs PI-MM    | 1746               | 15873                  | 17619                      |
| height             | age,sex         | PI-MS vs PI-MM    | 1739               | 15902                  | 17641                      |
| BMI                | age,sex         | PI-MS vs PI-MM    | 1732               | 15782                  | 17514                      |
| FEV1               | age,sex         | PI-MS vs PI-MM    | 1490               | 13721                  | 15211                      |
| FVC                | age,sex         | PI-MS vs PI-MM    | 1490               | 13721                  | 15211                      |
| FEV1/FVC ratio     | age,sex         | PI-MS vs PI-MM    | 1490               | 13721                  | 15211                      |
| FEV1               | age,sex, hadj   | PI-MS vs PI-MM    | 1471               | 13579                  | 15050                      |
| FVC                | age,sex, hadj   | PI-MS vs PI-MM    | 1471               | 13579                  | 15050                      |
| FEV1/FVC ratio     | age,sex, hadj   | PI-MS vs PI-MM    | 1471               | 13579                  | 15050                      |
| FEV1               | age,sex, hadj3  | PI-MS vs PI-MM    | 1471               | 13579                  | 15050                      |
| FVC                | age,sex, hadj3  | PI-MS vs PI-MM    | 1471               | 13579                  | 15050                      |
| FEV1/FVC ratio     | age,sex, hadj3  | PI-MS vs PI-MM    | 1471               | 13579                  | 15050                      |
| COPD               | age,sex         | PI-MS vs PI-MM    | 1471               | 13579                  | 15050                      |
| height             | age,sex - lfadj | PI-MS vs PI-MM    | 1471               | 13579                  | 15050                      |
| grip strength      | age,sex         | PI-MS vs PI-MM    | 1114               | 10025                  | 11139                      |
| walk speed         | age,sex         | PI-MS vs PI-MM    | 1073               | 10088                  | 11161                      |
| ability to balance | age,sex         | PI-MS vs PI-MM    | 994                | 9209                   | 10203                      |
| chair rise speed   | age,sex         | PI-MS vs PI-MM    | 804                | 7547                   | 8351                       |
| height             | age,sex         | PI-MZ vs PI-MM    | 725                | 15902                  | 16627                      |
| weight             | age,sex         | PI-MZ vs PI-MM    | 725                | 15873                  | 16598                      |
| height_trim        | age,sex         | PI-MZ vs PI-MM    | 724                | 15871                  | 16595                      |
| BMI                | age,sex         | PI-MZ vs PI-MM    | 722                | 15782                  | 16504                      |
| weight_trim        | age,sex         | PI-MZ vs PI-MM    | 719                | 15763                  | 16482                      |
| FEV1               | exsmok          | PI-MS vs PI-MM    | 665                | 6135                   | 6800                       |
| FVC                | exsmok          | PI-MS vs PI-MM    | 665                | 6135                   | 6800                       |
| FEV1/FVC ratio     | exsmok          | PI-MS vs PI-MM    | 665                | 6135                   | 6800                       |
| FEV1               | age,sex         | PI-MZ vs PI-MM    | 640                | 13721                  | 14361                      |
| FEV1_trim          | age,sex         | PI-MZ vs PI-MM    | 640                | 13697                  | 14337                      |
| FVC                | age,sex         | PI-MZ vs PI-MM    | 640                | 13721                  | 14361                      |
| FEV1/FVC ratio     | age,sex         | PI-MZ vs PI-MM    | 640                | 13721                  | 14361                      |
| FVC_trim           | age,sex         | PI-MZ vs PI-MM    | 637                | 13682                  | 14319                      |
| FEV1               | age,sex, hadj   | PI-MZ vs PI-MM    | 633                | 13579                  | 14212                      |
| FEV1_trim          | age,sex, hadj   | PI-MZ vs PI-MM    | 633                | 13556                  | 14189                      |
| FVC                | age,sex, hadj   | PI-MZ vs PI-MM    | 633                | 13579                  | 14212                      |
| FEV1/FVC ratio     | age,sex, hadj   | PI-MZ vs PI-MM    | 633                | 13579                  | 14212                      |
| FEV1               | age,sex, hadj3  | PI-MZ vs PI-MM    | 633                | 13579                  | 14212                      |
| FVC                | age,sex, hadj3  | PI-MZ vs PI-MM    | 633                | 13579                  | 14212                      |
| FEV1/FVC ratio     | age,sex, hadj3  | PI-MZ vs PI-MM    | 633                | 13579                  | 14212                      |
| COPD               | age,sex         | PI-MZ vs PI-MM    | 633                | 13579                  | 14212                      |
| height             | age,sex - lfadj | PI-MZ vs PI-MM    | 633                | 13579                  | 14212                      |
| height_trim        | age,sex - lfadj | PI-MZ vs PI-MM    | 632                | 13555                  | 14187                      |
| FVC_trim           | age,sex, hadj   | PI-MZ vs PI-MM    | 630                | 13540                  | 14170                      |
| FEV1               | neversmok       | PI-MS vs PI-MM    | 558                | 5219                   | 5777                       |
| FVC                | neversmok       | PI-MS vs PI-MM    | 558                | 5219                   | 5777                       |
| FEV1/FVC ratio     | neversmok       | PI-MS vs PI-MM    | 558                | 5219                   | 5777                       |
| TUG speed          | age,sex         | PI-MS vs PI-MM    | 481                | 4381                   | 4862                       |
| grip strength      | age,sex         | PI-MZ vs PI-MM    | 467                | 10025                  | 10492                      |
| FEV1               | age,sex         | DeltaF508 carrier | 452                | 14854                  | 15306                      |
| FVC                | age,sex         | DeltaF508 carrier | 452                | 14854                  | 15306                      |
| FEV1/FVC ratio     | age,sex         | DeltaF508 carrier | 452                | 14854                  | 15306                      |
| walk speed         | age,sex         | PI-MZ vs PI-MM    | 450                | 10088                  | 10538                      |
| FEV1               | hadj            | DeltaF508 carrier | 442                | 14697                  | 15139                      |
| FVC                | hadj            | DeltaF508 carrier | 442                | 14697                  | 15139                      |
| FEV1/FVC ratio     | hadj            | DeltaF508 carrier | 442                | 14697                  | 15139                      |
| COPD               | age,sex         | DeltaF508 carrier | 442                | 14697                  | 15139                      |
| ability to balance | age,sex         | PI-MZ vs PI-MM    | 422                | 9209                   | 9631                       |
| chair rise speed   | age,sex         | PI-MZ vs PI-MM    | 348                | 7547                   | 7895                       |
| FEV1               | exsmok          | PI-MZ vs PI-MM    | 287                | 6135                   | 6422                       |
| FVC                | exsmok          | PI-MZ vs PI-MM    | 287                | 6135                   | 6422                       |
| FEV1/FVC ratio     | exsmok          | PI-MZ vs PI-MM    | 287                | 6135                   | 6422                       |
| FEV1               | currsmok        | PI-MS vs PI-MM    | 263                | 2333                   | 2596                       |
| FVC                | currsmok        | PI-MS vs PI-MM    | 263                | 2333                   | 2596                       |
| FEV1/FVC ratio     | currsmok        | PI-MS vs PI-MM    | 263                | 2333                   | 2596                       |
| FEV1               | neversmok       | PI-MZ vs PI-MM    | 254                | 5219                   | 5473                       |
| FVC                | neversmok       | PI-MZ vs PI-MM    | 254                | 5219                   | 5473                       |

|                     |                            |                      |     |       |       |
|---------------------|----------------------------|----------------------|-----|-------|-------|
| FEV1/FVC ratio      | neversmok                  | PI-MZ vs PI-MM       | 254 | 5219  | 5473  |
| FEV1                | exsmok                     | DeltaF508 carrier    | 221 | 6656  | 6877  |
| FVC                 | exsmok                     | DeltaF508 carrier    | 221 | 6656  | 6877  |
| FEV1/FVC ratio      | exsmok                     | DeltaF508 carrier    | 221 | 6656  | 6877  |
| TUG speed           | age,sex                    | PI-MZ vs PI-MM       | 218 | 4381  | 4599  |
| semantic fluency    | age,sex                    | K304E carrier        | 208 | 12753 | 12961 |
| height              | age,sex - under 55         | PI-MZ vs PI-MM       | 204 | 4348  | 4552  |
| word recall ability | age,sex                    | K304E carrier        | 193 | 11505 | 11698 |
| walk speed          | age,sex                    | K304E carrier        | 177 | 10541 | 10718 |
| grip strength       | age,sex                    | K304E carrier        | 171 | 11651 | 11822 |
| ability to balance  | age,sex                    | K304E carrier        | 156 | 10650 | 10806 |
| FEV1                | neversmok                  | DeltaF508 carrier    | 151 | 5603  | 5754  |
| FVC                 | neversmok                  | DeltaF508 carrier    | 151 | 5603  | 5754  |
| FEV1/FVC ratio      | neversmok                  | DeltaF508 carrier    | 151 | 5603  | 5754  |
| chair rise speed    | age,sex                    | K304E carrier        | 134 | 8720  | 8854  |
| FEV1                | age,sex, in COPD           | PI-MS vs PI-MM       | 118 | 1118  | 1236  |
| FEV1                | age,sex,hadj,SSadj in COPD | PI-MS vs PI-MM       | 118 | 1116  | 1234  |
| FVC                 | age,sex, in COPD           | PI-MS vs PI-MM       | 118 | 1118  | 1236  |
| FVC                 | age,sex,hadj,SSadj in COPD | PI-MS vs PI-MM       | 118 | 1116  | 1234  |
| FEV1/FVC ratio      | age,sex, in COPD           | PI-MS vs PI-MM       | 118 | 1118  | 1236  |
| FEV1/FVC ratio      | age,sex,hadj,SSadj in COPD | PI-MS vs PI-MM       | 118 | 1116  | 1234  |
| FEV1                | currsmok                   | PI-MZ vs PI-MM       | 97  | 2333  | 2430  |
| FVC                 | currsmok                   | PI-MZ vs PI-MM       | 97  | 2333  | 2430  |
| FEV1/FVC ratio      | currsmok                   | PI-MZ vs PI-MM       | 97  | 2333  | 2430  |
| AH4                 | age,sex                    | K304E carrier        | 94  | 5232  | 5326  |
| semantic fluency    | age,sex                    | PAH mutation carrier | 81  | 12708 | 12789 |
| FEV1                | currsmok                   | DeltaF508 carrier    | 79  | 2559  | 2638  |
| FVC                 | currsmok                   | DeltaF508 carrier    | 79  | 2559  | 2638  |
| FEV1/FVC ratio      | currsmok                   | DeltaF508 carrier    | 79  | 2559  | 2638  |
| word recall ability | age,sex                    | PAH mutation carrier | 74  | 11456 | 11530 |
| TUG speed           | age,sex                    | K304E carrier        | 69  | 5053  | 5122  |
| grip strength       | age,sex                    | PAH mutation carrier | 69  | 11587 | 11656 |
| walk speed          | age,sex                    | PAH mutation carrier | 67  | 10525 | 10592 |
| ability to balance  | age,sex                    | PAH mutation carrier | 62  | 10589 | 10651 |
| chair rise speed    | age,sex                    | PAH mutation carrier | 54  | 8661  | 8715  |
| FEV1                | age,sex, in COPD           | PI-MZ vs PI-MM       | 51  | 1118  | 1169  |
| FEV1                | age,sex,hadj,SSadj in COPD | PI-MZ vs PI-MM       | 51  | 1116  | 1167  |
| FVC                 | age,sex, in COPD           | PI-MZ vs PI-MM       | 51  | 1118  | 1169  |
| FVC                 | age,sex,hadj,SSadj in COPD | PI-MZ vs PI-MM       | 51  | 1116  | 1167  |
| FEV1/FVC ratio      | age,sex, in COPD           | PI-MZ vs PI-MM       | 51  | 1118  | 1169  |
| FEV1/FVC ratio      | age,sex,hadj,SSadj in COPD | PI-MZ vs PI-MM       | 51  | 1116  | 1167  |
| height              | age,sex                    | PI-SZ vs PI-MM       | 42  | 15902 | 15944 |
| FEV1                | COPD                       | DeltaF508 carrier    | 41  | 1212  | 1253  |
| FVC                 | COPD                       | DeltaF508 carrier    | 41  | 1212  | 1253  |
| FEV1/FVC ratio      | COPD                       | DeltaF508 carrier    | 41  | 1212  | 1253  |
| height              | age,sex                    | PI-SS vs PI-MM       | 41  | 15902 | 15943 |
| weight              | age,sex                    | PI-SZ vs PI-MM       | 41  | 15873 | 15914 |
| weight              | age,sex                    | PI-SS vs PI-MM       | 41  | 15873 | 15914 |
| BMI                 | age,sex                    | PI-SZ vs PI-MM       | 41  | 15782 | 15823 |
| BMI                 | age,sex                    | PI-SS vs PI-MM       | 41  | 15782 | 15823 |
| AH4                 | age,sex                    | PAH mutation carrier | 38  | 5225  | 5263  |
| FEV1                | age,sex, hadj              | PI-SZ vs PI-MM       | 37  | 13579 | 13616 |
| FEV1                | age,sex, hadj              | PI-SS vs PI-MM       | 37  | 13579 | 13616 |
| FEV1                | age,sex                    | PI-SZ vs PI-MM       | 37  | 13721 | 13758 |
| FVC                 | age,sex                    | PI-SZ vs PI-MM       | 37  | 13721 | 13758 |
| FEV1/FVC ratio      | age,sex                    | PI-SZ vs PI-MM       | 37  | 13721 | 13758 |
| FVC                 | age,sex, hadj              | PI-SZ vs PI-MM       | 37  | 13579 | 13616 |
| FEV1/FVC ratio      | age,sex, hadj              | PI-SZ vs PI-MM       | 37  | 13579 | 13616 |

|                                                                                                                                                                                                                                                                                                                                                                      |                 |                      |    |       |       |
|----------------------------------------------------------------------------------------------------------------------------------------------------------------------------------------------------------------------------------------------------------------------------------------------------------------------------------------------------------------------|-----------------|----------------------|----|-------|-------|
| FEV1                                                                                                                                                                                                                                                                                                                                                                 | age,sex, hadj3  | PI-SZ vs PI-MM       | 37 | 13579 | 13616 |
| FVC                                                                                                                                                                                                                                                                                                                                                                  | age,sex, hadj3  | PI-SZ vs PI-MM       | 37 | 13579 | 13616 |
| FEV1/FVC ratio                                                                                                                                                                                                                                                                                                                                                       | age,sex, hadj3  | PI-SZ vs PI-MM       | 37 | 13579 | 13616 |
| height                                                                                                                                                                                                                                                                                                                                                               | age,sex - lfadj | PI-SZ vs PI-MM       | 37 | 13579 | 13616 |
| height                                                                                                                                                                                                                                                                                                                                                               | age,sex - lfadj | PI-SS vs PI-MM       | 37 | 13579 | 13616 |
| FEV1                                                                                                                                                                                                                                                                                                                                                                 | age,sex         | PI-SS vs PI-MM       | 37 | 13721 | 13758 |
| FVC                                                                                                                                                                                                                                                                                                                                                                  | age,sex         | PI-SS vs PI-MM       | 37 | 13721 | 13758 |
| FEV1/FVC ratio                                                                                                                                                                                                                                                                                                                                                       | age,sex         | PI-SS vs PI-MM       | 37 | 13721 | 13758 |
| FVC                                                                                                                                                                                                                                                                                                                                                                  | age,sex, hadj   | PI-SS vs PI-MM       | 37 | 13579 | 13616 |
| FEV1/FVC ratio                                                                                                                                                                                                                                                                                                                                                       | age,sex, hadj   | PI-SS vs PI-MM       | 37 | 13579 | 13616 |
| FEV1                                                                                                                                                                                                                                                                                                                                                                 | age,sex, hadj3  | PI-SS vs PI-MM       | 37 | 13579 | 13616 |
| FVC                                                                                                                                                                                                                                                                                                                                                                  | age,sex, hadj3  | PI-SS vs PI-MM       | 37 | 13579 | 13616 |
| FEV1/FVC ratio                                                                                                                                                                                                                                                                                                                                                       | age,sex, hadj3  | PI-SS vs PI-MM       | 37 | 13579 | 13616 |
| walk speed                                                                                                                                                                                                                                                                                                                                                           | age,sex         | PI-SS vs PI-MM       | 32 | 10088 | 10120 |
| grip strength                                                                                                                                                                                                                                                                                                                                                        | age,sex         | PI-SZ vs PI-MM       | 31 | 10025 | 10056 |
| TUG speed                                                                                                                                                                                                                                                                                                                                                            | age,sex         | PAH mutation carrier | 30 | 5028  | 5058  |
| NART                                                                                                                                                                                                                                                                                                                                                                 | age,sex         | PAH mutation carrier | 29 | 4203  | 4232  |
| walk speed                                                                                                                                                                                                                                                                                                                                                           | age,sex         | PI-SZ vs PI-MM       | 28 | 10088 | 10116 |
| grip strength                                                                                                                                                                                                                                                                                                                                                        | age,sex         | PI-SS vs PI-MM       | 28 | 10025 | 10053 |
| chair rise speed                                                                                                                                                                                                                                                                                                                                                     | age,sex         | PI-SZ vs PI-MM       | 25 | 7547  | 7572  |
| chair rise speed                                                                                                                                                                                                                                                                                                                                                     | age,sex         | PI-SS vs PI-MM       | 19 | 7547  | 7566  |
| FEV1                                                                                                                                                                                                                                                                                                                                                                 | exsmok          | PI-SZ vs PI-MM       | 18 | 6135  | 6153  |
| FVC                                                                                                                                                                                                                                                                                                                                                                  | exsmok          | PI-SZ vs PI-MM       | 18 | 6135  | 6153  |
| FEV1/FVC ratio                                                                                                                                                                                                                                                                                                                                                       | exsmok          | PI-SZ vs PI-MM       | 18 | 6135  | 6153  |
| FEV1                                                                                                                                                                                                                                                                                                                                                                 | neversmok       | PI-SZ vs PI-MM       | 17 | 5219  | 5236  |
| FVC                                                                                                                                                                                                                                                                                                                                                                  | neversmok       | PI-SZ vs PI-MM       | 17 | 5219  | 5236  |
| FEV1/FVC ratio                                                                                                                                                                                                                                                                                                                                                       | neversmok       | PI-SZ vs PI-MM       | 17 | 5219  | 5236  |
| FEV1                                                                                                                                                                                                                                                                                                                                                                 | exsmok          | PI-SS vs PI-MM       | 17 | 6135  | 6152  |
| FVC                                                                                                                                                                                                                                                                                                                                                                  | exsmok          | PI-SS vs PI-MM       | 17 | 6135  | 6152  |
| FEV1/FVC ratio                                                                                                                                                                                                                                                                                                                                                       | exsmok          | PI-SS vs PI-MM       | 17 | 6135  | 6152  |
| FEV1                                                                                                                                                                                                                                                                                                                                                                 | neversmok       | PI-SS vs PI-MM       | 16 | 5219  | 5235  |
| FVC                                                                                                                                                                                                                                                                                                                                                                  | neversmok       | PI-SS vs PI-MM       | 16 | 5219  | 5235  |
| FEV1/FVC ratio                                                                                                                                                                                                                                                                                                                                                       | neversmok       | PI-SS vs PI-MM       | 16 | 5219  | 5235  |
| TUG speed                                                                                                                                                                                                                                                                                                                                                            | age,sex         | PI-SZ vs PI-MM       | 14 | 4381  | 4395  |
| TUG speed                                                                                                                                                                                                                                                                                                                                                            | age,sex         | PI-SS vs PI-MM       | 12 | 4381  | 4393  |
| height                                                                                                                                                                                                                                                                                                                                                               | age,sex         | PI-ZZ vs PI-MM       | 8  | 15902 | 15910 |
| weight                                                                                                                                                                                                                                                                                                                                                               | age,sex         | PI-ZZ vs PI-MM       | 8  | 15873 | 15881 |
| BMI                                                                                                                                                                                                                                                                                                                                                                  | age,sex         | PI-ZZ vs PI-MM       | 8  | 15782 | 15790 |
| FEV1                                                                                                                                                                                                                                                                                                                                                                 | age,sex, hadj   | PI-ZZ vs PI-MM       | 6  | 13579 | 13585 |
| FEV1                                                                                                                                                                                                                                                                                                                                                                 | age,sex         | PI-ZZ vs PI-MM       | 6  | 13721 | 13727 |
| FVC                                                                                                                                                                                                                                                                                                                                                                  | age,sex         | PI-ZZ vs PI-MM       | 6  | 13721 | 13727 |
| height                                                                                                                                                                                                                                                                                                                                                               | age,sex - lfadj | PI-ZZ vs PI-MM       | 6  | 13579 | 13585 |
| FEV1/FVC ratio                                                                                                                                                                                                                                                                                                                                                       | age,sex         | PI-ZZ vs PI-MM       | 6  | 13721 | 13727 |
| FVC                                                                                                                                                                                                                                                                                                                                                                  | age,sex, hadj   | PI-ZZ vs PI-MM       | 6  | 13579 | 13585 |
| FEV1/FVC ratio                                                                                                                                                                                                                                                                                                                                                       | age,sex, hadj   | PI-ZZ vs PI-MM       | 6  | 13579 | 13585 |
| FEV1                                                                                                                                                                                                                                                                                                                                                                 | age,sex, hadj3  | PI-ZZ vs PI-MM       | 6  | 13579 | 13585 |
| FVC                                                                                                                                                                                                                                                                                                                                                                  | age,sex, hadj3  | PI-ZZ vs PI-MM       | 6  | 13579 | 13585 |
| FEV1/FVC ratio                                                                                                                                                                                                                                                                                                                                                       | age,sex, hadj3  | PI-ZZ vs PI-MM       | 6  | 13579 | 13585 |
| FEV1                                                                                                                                                                                                                                                                                                                                                                 | currsmok        | PI-SS vs PI-MM       | 4  | 2333  | 2337  |
| FVC                                                                                                                                                                                                                                                                                                                                                                  | currsmok        | PI-SS vs PI-MM       | 4  | 2333  | 2337  |
| FEV1/FVC ratio                                                                                                                                                                                                                                                                                                                                                       | currsmok        | PI-SS vs PI-MM       | 4  | 2333  | 2337  |
| FEV1                                                                                                                                                                                                                                                                                                                                                                 | neversmok       | PI-ZZ vs PI-MM       | 3  | 5219  | 5222  |
| FVC                                                                                                                                                                                                                                                                                                                                                                  | neversmok       | PI-ZZ vs PI-MM       | 3  | 5219  | 5222  |
| FEV1/FVC ratio                                                                                                                                                                                                                                                                                                                                                       | neversmok       | PI-ZZ vs PI-MM       | 3  | 5219  | 5222  |
| Hadj – height + height <sup>2</sup> adjusted<br>Hadj3 – height + height <sup>2</sup> + height <sup>3</sup> adjusted<br>SSadj – smoking status adjusted<br>Lfadj – FEV1 and FVC adjusted<br>Exsmok – analysis in ex smokers<br>Neversmok-analysis in never smokers<br>Currsmok – analysis in current smokers<br>COPD – analysis in individuals classed as having COPD |                 |                      |    |       |       |

## Alpha 1-antitrypsin deficiency

**S3 Table. Alpha 1-antitrypsin deficiency PI status frequencies**

| Cohort                                                                                                                                                                 | MM    | MS   | MZ   | SS   | SZ   | ZZ   | Total, N <sup>a</sup> | % female | Mean age <sup>b</sup> (SE) |
|------------------------------------------------------------------------------------------------------------------------------------------------------------------------|-------|------|------|------|------|------|-----------------------|----------|----------------------------|
| BO                                                                                                                                                                     | 232   | 24   | 6    | 0    | 0    | 0    | 262                   | 54.96    | 69.61(0.26)                |
| CaPS                                                                                                                                                                   | 1112  | 112  | 61   | 0    | 3    | 1    | 1289                  | 0        | 53.79(0.14)                |
| ELSA                                                                                                                                                                   | 4279  | 450  | 195  | 11   | 16   | 1    | 4952                  | 53.92    | 65.59(0.13)                |
| HAS                                                                                                                                                                    | 155   | 15   | 13   | 1    | 2    | 0    | 186                   | 35.48    | 76.38(0.17)                |
| HCS                                                                                                                                                                    | 2133  | 256  | 111  | 6    | 7    | 0    | 2513                  | 47       | 66.09(0.06)                |
| LBC1921                                                                                                                                                                | 443   | 40   | 17   | 3    | 1    | 0    | 504                   | 58.73    | 79.06(0.03)                |
| NSHD                                                                                                                                                                   | 1704  | 191  | 81   | 6    | 2    | 1    | 1985                  | 52.34    | 53.45(0.00)                |
| WHII                                                                                                                                                                   | 3663  | 402  | 156  | 10   | 6    | 3    | 4240                  | 29.41    | 60.74(0.09)                |
| Combined                                                                                                                                                               | 13721 | 1490 | 640  | 37   | 37   | 6    | 15931                 | 41.7     | 62.53(0.07)                |
| Combined (%)                                                                                                                                                           | 86.13 | 9.35 | 4.02 | 0.23 | 0.23 | 0.04 | 100                   |          |                            |
| <sup>a</sup> Total number of individuals is total number with a valid PI status, sex, age and lung function<br><sup>b</sup> mean age at wave of lung function outcomes |       |      |      |      |      |      |                       |          |                            |

**S4 Table. HWE of PI-S (rs17580)**

| Cohort            | T/T   | T/A  | A/A | Total | HWE P-value |
|-------------------|-------|------|-----|-------|-------------|
| BO                | 238   | 24   | 0   | 262   | 0.437       |
| CaPS              | 1174  | 115  | 0   | 1289  | 0.094       |
| ELSA              | 4475  | 466  | 11  | 4952  | 0.756       |
| HAS               | 168   | 17   | 1   | 186   | 0.436       |
| HCS               | 2244  | 263  | 6   | 2513  | 0.557       |
| LBC1921           | 460   | 41   | 3   | 504   | 0.056       |
| NSHD <sup>a</sup> | 1786  | 193  | 6   | 1985  | 0.746       |
| WHII              | 3822  | 408  | 10  | 4240  | 0.797       |
| TOTAL             | 14367 | 1527 | 37  | 15931 | 0.593       |

Based on all individuals with a valid PI status, age, sex and lung function outcomes  
<sup>a</sup> Derived from PI classes from isoelectric focusing(17)

**S5 Table. HWE of PI-Z (rs28929474)**

| Cohort            | G/G   | G/A | A/A | Total | HWE P-value |
|-------------------|-------|-----|-----|-------|-------------|
| BO                | 256   | 6   | 0   | 262   | 0.851       |
| CaPS              | 1224  | 64  | 1   | 1289  | 0.862       |
| ELSA              | 4740  | 211 | 1   | 4952  | 0.384       |
| HAS               | 171   | 15  | 0   | 186   | 0.567       |
| HCS               | 2395  | 118 | 0   | 2513  | 0.228       |
| LBC1921           | 486   | 18  | 0   | 504   | 0.683       |
| NSHD <sup>a</sup> | 1901  | 83  | 1   | 1985  | 0.923       |
| WHII              | 4075  | 162 | 3   | 4240  | 0.291       |
| TOTAL             | 15248 | 677 | 6   | 15931 | 0.587       |

Based on all individuals with a valid PI status, age, sex and lung function outcomes  
<sup>a</sup> Derived from PI classes from isoelectric focusing(17)

**S6 Table. Association of PI status with lung function, adjusted for age and sex**

| Outcome                             | Cohort                      | Regression Coefficient (95% CI) |                             |                             |                             |           |
|-------------------------------------|-----------------------------|---------------------------------|-----------------------------|-----------------------------|-----------------------------|-----------|
|                                     |                             | MS VS. MM                       | MZ VS. MM                   | SS VS. MM                   | SZ VS. MM                   | ZZ VS. MM |
| Maximum FEV1                        | BO                          | -0.05(-0.36,0.27)               | 0.45(-0.14,1.04)            | a                           |                             |           |
|                                     | CaPS                        | 0.07(-0.10,0.24)                | 0.11(-0.12,0.33)            |                             |                             |           |
|                                     | ELSA                        | 0.05(-0.03,0.12)                | 0.12*(0.01,0.23)            |                             |                             |           |
|                                     | HAS                         | -0.49*(-0.94,-0.05)             | 0.08(-0.39,0.55)            |                             |                             |           |
|                                     | HCS                         | -0.01(-0.10,0.09)               | 0.05(-0.10,0.19)            |                             |                             |           |
|                                     | LBC1921                     | -0.06(-0.31,0.19)               | 0.16(-0.22,0.54)            |                             |                             |           |
|                                     | NSHD                        | 0.02(-0.09,0.13)                | 0.18*(0.01,0.35)            |                             |                             |           |
|                                     | WHII                        | 0.05(-0.03,0.12)                | 0.18**(0.06,0.29)           |                             |                             |           |
|                                     | Combined Fixed Effect       | 0.03(-0.01,0.07)                | 0.13****(0.07,0.19)         |                             |                             |           |
| Combined Random Effect              | 0.03(-0.01,0.07)            | 0.13****(0.07,0.19)             | 0.02(-0.22,0.26)            | 0.07(-0.18,0.31)            | -0.35(-0.95,0.25)           |           |
| Estimated variance of random effect | 1.20e-13(0.00e+00,..)       | 1.09e-19(0.00e+00,..)           | 7.37e-12(4.15e-26,1.31e+03) | 2.04e-14(5.46e-28,7.65e-01) | 5.65e-10(0.00e+00,..)       |           |
| Maximum FVC                         | BO                          | 0.03(-0.26,0.32)                | 0.43(-0.11,0.97)            | a                           |                             |           |
|                                     | CaPS                        | 0.08(-0.10,0.26)                | 0.15(-0.09,0.39)            |                             |                             |           |
|                                     | ELSA                        | 0.02(-0.05,0.09)                | 0.12*(0.01,0.22)            |                             |                             |           |
|                                     | HAS                         | -0.35(-0.73,0.03)               | 0.33(-0.09,0.74)            |                             |                             |           |
|                                     | HCS                         | -0.02(-0.11,0.07)               | 0.14*(0.01,0.27)            |                             |                             |           |
|                                     | LBC1921                     | -0.07(-0.32,0.17)               | 0.20(-0.17,0.56)            |                             |                             |           |
|                                     | NSHD                        | 0.02(-0.09,0.13)                | 0.20*(0.04,0.37)            |                             |                             |           |
|                                     | WHII                        | -0.01(-0.08,0.07)               | 0.19**(0.07,0.30)           |                             |                             |           |
|                                     | Combined Fixed Effect       | 0.01(-0.03,0.04)                | 0.16****(0.10,0.22)         |                             |                             |           |
| Combined Random Effect              | 0.00(-0.04,0.04)            | 0.16****(0.10,0.22)             | -0.11(-0.34,0.12)           | 0.07(-0.17,0.30)            | -0.18(-0.77,0.41)           |           |
| Estimated variance of random effect | 3.76e-15(1.01e-28,1.40e-01) | 3.53e-19(0.00e+00,..)           | 4.07e-14(8.72e-29,1.90e+01) | 9.77e-13(1.11e-31,8.59e+06) | 3.87e-14(2.43e-32,6.18e+04) |           |

|                                                                                                                                                                                                                          |                                     |                             |                             |                             |                             |                             |
|--------------------------------------------------------------------------------------------------------------------------------------------------------------------------------------------------------------------------|-------------------------------------|-----------------------------|-----------------------------|-----------------------------|-----------------------------|-----------------------------|
| FEV1/FVC ratio                                                                                                                                                                                                           | BO                                  | -0.31(-0.73,0.11)           | 0.15(-0.64,0.95)            | a                           |                             |                             |
|                                                                                                                                                                                                                          | CaPS                                | 0.02(-0.15,0.18)            | 0.03(-0.20,0.25)            |                             |                             |                             |
|                                                                                                                                                                                                                          | ELSA                                | 0.04(-0.06,0.13)            | 0.01(-0.14,0.15)            |                             |                             |                             |
|                                                                                                                                                                                                                          | HAS                                 | -0.34(-0.89,0.22)           | -0.29(-0.85,0.27)           |                             |                             |                             |
|                                                                                                                                                                                                                          | HCS                                 | 0.03(-0.10,0.15)            | -0.13(-0.32,0.06)           |                             |                             |                             |
|                                                                                                                                                                                                                          | LBC1921                             | -0.02(-0.34,0.31)           | -0.15(-0.65,0.34)           |                             |                             |                             |
|                                                                                                                                                                                                                          | NSHD                                | -0.03(-0.18,0.12)           | -0.10(-0.32,0.12)           |                             |                             |                             |
|                                                                                                                                                                                                                          | WHII                                | 0.11*(0.01,0.21)            | 0.02(-0.14,0.18)            |                             |                             |                             |
|                                                                                                                                                                                                                          | Combined Fixed Effect               | 0.03(-0.02,0.09)            | -0.04(-0.11,0.04)           |                             |                             |                             |
|                                                                                                                                                                                                                          | Combined Random Effect              | 0.03(-0.02,0.09)            | -0.03(-0.11,0.04)           | 0.23(-0.09,0.55)            | 0.01(-0.31,0.32)            | -0.55(-1.43,0.34)           |
|                                                                                                                                                                                                                          | Estimated variance of random effect | 3.41e-17(4.23e-30,2.75e-04) | 1.34e-18(9.21e-33,1.95e-04) | 4.77e-17(7.55e-32,3.02e-02) | 2.73e-15(2.55e-32,2.92e+02) | 1.60e-01(2.99e-04,8.50e+01) |
| <p>Outcomes z-scored within cohorts<br/> *p&lt;0.05, **p&lt;0.01, ***p&lt;0.001, ****p&lt;0.0001<br/> <sup>a</sup> Cohort specific estimates are suppressed for PI-SS, SZ and ZZ due to the small number of carriers</p> |                                     |                             |                             |                             |                             |                             |



**S7 Table. Association of PI status with transformed lung function, adjusted for age and sex**

| Outcome                             | Cohort                      | Regression Coefficient (95% CI) |                             |                             |                             |           |
|-------------------------------------|-----------------------------|---------------------------------|-----------------------------|-----------------------------|-----------------------------|-----------|
|                                     |                             | MS VS. MM                       | MZ VS. MM                   | SS VS. MM                   | SZ VS. MM                   | ZZ VS. MM |
| Sqrt(Maximum FVC)                   | BO                          | -0.02(-0.32,0.27)               | 0.43(-0.12,0.97)            | a                           |                             |           |
|                                     | CaPS                        | 0.08(-0.10,0.25)                | 0.13(-0.10,0.36)            |                             |                             |           |
|                                     | ELSA                        | 0.02(-0.05,0.09)                | 0.10(-0.00,0.21)            |                             |                             |           |
|                                     | HAS                         | -0.35(-0.73,0.03)               | 0.31(-0.10,0.72)            |                             |                             |           |
|                                     | HCS                         | -0.01(-0.10,0.07)               | 0.12(-0.00,0.25)            |                             |                             |           |
|                                     | LBC1921                     | -0.08(-0.33,0.17)               | 0.18(-0.19,0.55)            |                             |                             |           |
|                                     | NSHD                        | 0.02(-0.09,0.13)                | 0.20*(0.04,0.37)            |                             |                             |           |
|                                     | WHII                        | -0.01(-0.08,0.06)               | 0.18**(0.07,0.29)           |                             |                             |           |
|                                     | Combined Fixed Effect       | 0.00(-0.04,0.04)                | 0.15****(0.09,0.21)         |                             |                             |           |
| Combined Random Effect              | 0.00(-0.04,0.04)            | 0.15****(0.09,0.21)             | -0.10(-0.33,0.13)           | 0.07(-0.16,0.31)            | -0.17(-0.75,0.42)           |           |
| Estimated variance of random effect | 1.03e-14(5.17e-28,2.07e-01) | 4.11e-17(9.66e-31,1.75e-03)     | 1.13e-14(1.77e-30,7.23e+01) | 1.80e-12(0.00e+00,.)        | 4.18e-09(3.76e-27,4.66e+09) |           |
| (FEV1/FVC ratio) <sup>3</sup>       | BO                          | -0.30(-0.72,0.13)               | 0.07(-0.75,0.88)            | a                           |                             |           |
|                                     | CaPS                        | -0.01(-0.18,0.17)               | 0.02(-0.22,0.25)            |                             |                             |           |
|                                     | ELSA                        | 0.03(-0.07,0.12)                | 0.02(-0.12,0.16)            |                             |                             |           |
|                                     | HAS                         | -0.27(-0.81,0.27)               | -0.37(-0.94,0.19)           |                             |                             |           |
|                                     | HCS                         | 0.02(-0.11,0.14)                | -0.08(-0.27,0.11)           |                             |                             |           |
|                                     | LBC1921                     | -0.06(-0.38,0.26)               | -0.14(-0.64,0.35)           |                             |                             |           |
|                                     | NSHD                        | -0.03(-0.18,0.12)               | -0.14(-0.36,0.08)           |                             |                             |           |
|                                     | WHII                        | 0.10*(0.00,0.21)                | 0.03(-0.13,0.19)            |                             |                             |           |
|                                     | Combined Fixed Effect       | 0.03(-0.03,0.08)                | -0.03(-0.11,0.05)           |                             |                             |           |
| Combined Random Effect              | 0.03(-0.03,0.08)            | -0.03(-0.10,0.05)               | 0.19(-0.13,0.50)            | -0.07(-0.38,0.25)           | -0.57(-1.35,0.21)           |           |
| Estimated variance of random effect | 1.74e-17(5.35e-31,5.65e-04) | 2.18e-17(2.82e-30,1.69e-04)     | 8.96e-20(7.43e-34,1.08e-05) | 4.48e-06(3.06e-19,6.56e+07) | 7.56e-10(3.04e-32,1.88e+13) |           |

Outcomes z-scored within cohorts  
 \*p<0.05, \*\*p<0.01, \*\*\*p<0.001, \*\*\*\*p<0.0001  
 a Cohort specific estimates are suppressed for PI-SS, SZ and ZZ due to the small number of carriers

**S8 Table. Association of PI-MZ with lung function with +/-3SDs removed from outcome before standardisation, adjusted for age and sex**

| Outcome                                     | Cohort                              | Regression Coefficient (95% CI) |
|---------------------------------------------|-------------------------------------|---------------------------------|
| Maximum FEV1                                | Combined Fixed Effect               | 0.14****(0.08,0.20)             |
|                                             | Combined Random Effect              | 0.14****(0.08,0.20)             |
|                                             | Estimated variance of random effect | 2.19e-17(2.33e-29,2.05e-05)     |
| Maximum FVC                                 | Combined Fixed Effect               | 0.16****(0.10,0.22)             |
|                                             | Combined Random Effect              | 0.16****(0.10,0.22)             |
|                                             | Estimated variance of random effect | 1.84e-17(9.28e-33,3.66e-02)     |
| Outcomes z-scored within cohorts            |                                     |                                 |
| *p<0.05, **p<0.01, ***p<0.001, ****p<0.0001 |                                     |                                 |

**S9 Table. Association of PI-MZ with lung function, raw values without z-scoring, adjusted for age and sex**

| Outcome                                     | Cohort                              | Regression Coefficient (95% CI) (Litres) |                  |
|---------------------------------------------|-------------------------------------|------------------------------------------|------------------|
| Maximum FEV1 (L)                            | BO                                  | 0.33(-0.10,0.75)                         |                  |
|                                             | CaPS                                | 0.08(-0.09,0.25)                         |                  |
|                                             | ELSA                                | 0.10*(0.01,0.19)                         |                  |
|                                             | HAS                                 | 0.05(-0.25,0.35)                         |                  |
|                                             | HCS                                 | 0.03(-0.07,0.13)                         |                  |
|                                             | LBC1921                             | 0.10(-0.14,0.34)                         |                  |
|                                             | NSHD                                | 0.12*(0.01,0.24)                         |                  |
|                                             | WHII                                | 0.14**(0.05,0.23)                        |                  |
|                                             | Combined Fixed Effect               | 0.10****(0.06,0.15)                      |                  |
|                                             | Combined Random Effect              | 0.10****(0.05,0.14)                      |                  |
|                                             | Estimated variance of random effect | 6.77e-21(1.15e-32,3.97e-09)              |                  |
|                                             | Maximum FVC (L)                     | BO                                       | 0.39(-0.10,0.89) |
|                                             |                                     | CaPS                                     | 0.12(-0.07,0.30) |
| ELSA                                        |                                     | 0.13*(0.02,0.24)                         |                  |
| HAS                                         |                                     | 0.26(-0.07,0.58)                         |                  |
| HCS                                         |                                     | 0.13*(0.01,0.25)                         |                  |
| LBC1921                                     |                                     | 0.14(-0.13,0.42)                         |                  |
| NSHD                                        |                                     | 0.18*(0.04,0.32)                         |                  |
| WHII                                        |                                     | 0.18**(0.07,0.29)                        |                  |
| Combined Fixed Effect                       |                                     | 0.15****(0.10,0.21)                      |                  |
| Combined Random Effect                      |                                     | 0.15****(0.10,0.21)                      |                  |
| Estimated variance of random effect         | 4.75e-21(5.59e-36,4.04e-06)         |                                          |                  |
| *p<0.05, **p<0.01, ***p<0.001, ****p<0.0001 |                                     |                                          |                  |

**S10 Table. Association of PI status with lung function, adjusted for age and sex, in current smokers**

| Outcome                                                                                                                                                                                                                                                                                                                                                                                                                                           | Cohort                              | Regression Coefficient (95% CI) |                             |                             |
|---------------------------------------------------------------------------------------------------------------------------------------------------------------------------------------------------------------------------------------------------------------------------------------------------------------------------------------------------------------------------------------------------------------------------------------------------|-------------------------------------|---------------------------------|-----------------------------|-----------------------------|
|                                                                                                                                                                                                                                                                                                                                                                                                                                                   |                                     | MS VS. MM                       | MZ VS. MM                   | SS VS. MM                   |
| Maximum FEV1                                                                                                                                                                                                                                                                                                                                                                                                                                      | Combined Fixed Effect               | 0.04(-0.06,0.14)                | 0.09(-0.07,0.25)            | -0.30(-1.08,0.48)           |
|                                                                                                                                                                                                                                                                                                                                                                                                                                                   | Combined Random Effect              | 0.03(-0.07,0.13)                | 0.09(-0.07,0.25)            | -0.31(-1.30,0.69)           |
|                                                                                                                                                                                                                                                                                                                                                                                                                                                   | Estimated variance of random effect | 1.58e-24(7.90e-45,3.15e-04)     | 7.96e-22(2.05e-41,3.10e-02) | 5.09e-01(2.86e-02,9.04e+00) |
| Maximum FVC                                                                                                                                                                                                                                                                                                                                                                                                                                       | Combined Fixed Effect               | 0.00(-0.09,0.10)                | 0.12(-0.04,0.28)            | -0.66(-1.42,0.11)           |
|                                                                                                                                                                                                                                                                                                                                                                                                                                                   | Combined Random Effect              | -0.01(-0.11,0.08)               | 0.14(-0.02,0.29)            | -0.67(-1.69,0.35)           |
|                                                                                                                                                                                                                                                                                                                                                                                                                                                   | Estimated variance of random effect | 8.57e-23(1.06e-47,6.95e+02)     | 3.94e-22 <sup>a</sup>       | 5.89e-01(4.30e-02,8.08e+00) |
| FEV1/FVC ratio                                                                                                                                                                                                                                                                                                                                                                                                                                    | Combined Fixed Effect               | 0.07(-0.07,0.20)                | -0.06(-0.28,0.15)           | 0.77(-0.29,1.83)            |
|                                                                                                                                                                                                                                                                                                                                                                                                                                                   | Combined Random Effect              | 0.06(-0.07,0.19)                | -0.02(-0.23,0.18)           | 0.74(-0.28,1.76)            |
|                                                                                                                                                                                                                                                                                                                                                                                                                                                   | Estimated variance of random effect | 2.75e-11(0.00e+00,..)           | 1.42e-13(5.60e-33,3.59e+06) | 9.39e-20(5.69e-39,1.55e+00) |
| <p>Outcomes z-scored within cohorts<br/>                     Cohort specific estimates are suppressed due to the small number of carriers<br/>                     Meta-analysis not possible for PI-SZ and ZZ as there were fewer than three cohorts with adequate data<br/>                     *p&lt;0.05, **p&lt;0.01, ***p&lt;0.001, ****p&lt;0.0001<br/> <sup>a</sup> Standard error of the variance of the random effect not estimable</p> |                                     |                                 |                             |                             |

**S11 Table. Association of PI status with transformed lung function, adjusted for age and sex, in current smokers**

| Outcome                                                                                                                                                                                                                                                                                           | Cohort                              | Regression Coefficient (95% CI) |                             |                             |
|---------------------------------------------------------------------------------------------------------------------------------------------------------------------------------------------------------------------------------------------------------------------------------------------------|-------------------------------------|---------------------------------|-----------------------------|-----------------------------|
|                                                                                                                                                                                                                                                                                                   |                                     | MS VS. MM                       | MZ VS. MM                   | SS VS. MM                   |
| Sqrt(Maximum FVC)                                                                                                                                                                                                                                                                                 | Combined Fixed Effect               | 0.01(-0.09,0.10)                | 0.11(-0.04,0.27)            | -0.72(-1.48,0.05)           |
|                                                                                                                                                                                                                                                                                                   | Combined Random Effect              | -0.01(-0.11,0.08)               | 0.13(-0.02,0.29)            | -0.70(-1.78,0.38)           |
|                                                                                                                                                                                                                                                                                                   | Estimated variance of random effect | 1.05e-17(4.73e-36,2.33e+01)     | 4.69e-24(5.98e-42,3.67e-06) | 6.98e-01(6.46e-02,7.55e+00) |
| (FEV1/FVC ratio) <sup>3</sup>                                                                                                                                                                                                                                                                     | Combined Fixed Effect               | 0.06(-0.07,0.19)                | -0.03(-0.24,0.18)           | 0.81(-0.19,1.82)            |
|                                                                                                                                                                                                                                                                                                   | Combined Random Effect              | 0.05(-0.08,0.18)                | -0.01(-0.21,0.19)           | 0.80(-0.21,1.81)            |
|                                                                                                                                                                                                                                                                                                   | Estimated variance of random effect | 3.60e-15(5.28e-28,2.46e-02)     | 6.98e-16(7.32e-32,6.66e+00) | 1.73e-12(2.54e-31,1.17e+07) |
| <p>Outcomes z-scored within cohorts<br/> Cohort specific estimates are suppressed due to the small number of carriers<br/> Meta-analysis not possible for PI-SZ and ZZ as there were fewer than three cohorts with adequate data<br/> *p&lt;0.05, **p&lt;0.01, ***p&lt;0.001, ****p&lt;0.0001</p> |                                     |                                 |                             |                             |

**S1 Table. Association of PI status with lung function, adjusted for age and sex, in ex smokers**

| Outcome                                                                                                                                                                                                                                                                                                                                               | Cohort                              | Regression Coefficient (95% CI) |                             |                             |                             |
|-------------------------------------------------------------------------------------------------------------------------------------------------------------------------------------------------------------------------------------------------------------------------------------------------------------------------------------------------------|-------------------------------------|---------------------------------|-----------------------------|-----------------------------|-----------------------------|
|                                                                                                                                                                                                                                                                                                                                                       |                                     | MS VS. MM                       | MZ VS. MM                   | SS VS. MM                   | SZ VS. MM                   |
| Maximum FEV1                                                                                                                                                                                                                                                                                                                                          | Combined Fixed Effect               | -0.01(-0.07,0.05)               | 0.13**(0.04,0.22)           | 0.18(-0.18,0.54)            | 0.26(-0.09,0.61)            |
|                                                                                                                                                                                                                                                                                                                                                       | Combined Random Effect              | -0.00(-0.06,0.06)               | 0.15*(0.03,0.26)            | 0.21(-0.15,0.57)            | NOCONVERGENCE <sup>a</sup>  |
|                                                                                                                                                                                                                                                                                                                                                       | Estimated variance of random effect | 1.85e-22(1.89e-36,1.81e-08)     | 6.60e-03(4.74e-04,9.19e-02) | 3.72e-14(0.00e+00,.)        | NOCONVERGENCE <sup>a</sup>  |
| Maximum FVC                                                                                                                                                                                                                                                                                                                                           | Combined Fixed Effect               | -0.02(-0.08,0.03)               | 0.19****(0.11,0.28)         | 0.04(-0.31,0.39)            | 0.29(-0.04,0.63)            |
|                                                                                                                                                                                                                                                                                                                                                       | Combined Random Effect              | -0.02(-0.08,0.03)               | 0.20****(0.11,0.28)         | 0.06(-0.29,0.41)            | 0.28(-0.06,0.61)            |
|                                                                                                                                                                                                                                                                                                                                                       | Estimated variance of random effect | 8.94e-16(1.09e-29,7.31e-02)     | 3.94e-18(3.65e-34,4.25e-02) | 9.69e-14(0.00e+00,.)        | 1.88e-12(4.93e-40,7.19e+15) |
| FEV1/FVC ratio                                                                                                                                                                                                                                                                                                                                        | Combined Fixed Effect               | 0.04(-0.04,0.11)                | -0.06(-0.17,0.05)           | 0.21(-0.25,0.67)            | -0.06(-0.51,0.38)           |
|                                                                                                                                                                                                                                                                                                                                                       | Combined Random Effect              | 0.04(-0.04,0.12)                | -0.06(-0.19,0.08)           | 0.21(-0.25,0.68)            | -0.06(-0.50,0.38)           |
|                                                                                                                                                                                                                                                                                                                                                       | Estimated variance of random effect | 6.41e-16(1.93e-30,2.14e-01)     | 7.46e-03(2.53e-04,2.19e-01) | 4.70e-14(6.50e-32,3.39e+04) | 8.66e-17(3.55e-35,2.11e+02) |
| <p>Outcomes z-scored within cohorts<br/> Cohort specific estimates are suppressed due to the small number of carriers<br/> Meta-analysis not possible for PI- ZZ as there were fewer than three cohorts with adequate data<br/> *p&lt;0.05, **p&lt;0.01, ***p&lt;0.001, ****p&lt;0.0001<br/> <sup>a</sup> Random effects model failed to converge</p> |                                     |                                 |                             |                             |                             |

**S2 Table. Association of PI status with transformed lung function, adjusted for age and sex, in ex smokers**

| Outcome                                                                                                                                                                                                                                                            | Cohort                              | Regression Coefficient (95% CI) |                             |                             |                             |
|--------------------------------------------------------------------------------------------------------------------------------------------------------------------------------------------------------------------------------------------------------------------|-------------------------------------|---------------------------------|-----------------------------|-----------------------------|-----------------------------|
|                                                                                                                                                                                                                                                                    |                                     | MS VS. MM                       | MZ VS. MM                   | SS VS. MM                   | SZ VS. MM                   |
| Sqrt(Maximum FVC)                                                                                                                                                                                                                                                  | Combined Fixed Effect               | -0.03(-0.08,0.03)               | 0.17****(0.08,0.25)         | 0.07(-0.27,0.41)            | 0.27(-0.06,0.60)            |
|                                                                                                                                                                                                                                                                    | Combined Random Effect              | -0.03(-0.08,0.03)               | 0.17****(0.09,0.26)         | 0.10(-0.25,0.44)            | 0.26(-0.07,0.60)            |
|                                                                                                                                                                                                                                                                    | Estimated variance of random effect | 2.89e-15(9.33e-30,8.94e-01)     | 5.26e-22(1.08e-39,2.57e-04) | 1.01e-13(0.00e+00,.)        | 1.79e-14(3.31e-33,9.64e+04) |
| (FEV1/FVC ratio) <sup>3</sup>                                                                                                                                                                                                                                      | Combined Fixed Effect               | 0.04(-0.04,0.11)                | -0.05(-0.17,0.06)           | 0.15(-0.31,0.61)            | -0.14(-0.59,0.31)           |
|                                                                                                                                                                                                                                                                    | Combined Random Effect              | 0.04(-0.04,0.12)                | -0.05(-0.19,0.08)           | 0.16(-0.31,0.63)            | -0.14(-0.59,0.31)           |
|                                                                                                                                                                                                                                                                    | Estimated variance of random effect | 6.21e-18(1.73e-33,2.23e-02)     | 5.30e-03(6.21e-05,4.52e-01) | 4.43e-13(4.36e-29,4.51e+03) | 9.95e-17(6.79e-33,1.46e+00) |
| Outcomes z-scored within cohorts<br>Cohort specific estimates are suppressed due to the small number of carriers<br>Meta-analysis not possible for PI- ZZ as there were fewer than three cohorts with adequate data<br>*p<0.05, **p<0.01, ***p<0.001, ****p<0.0001 |                                     |                                 |                             |                             |                             |

**S3 Table. Association of PI status with lung function, adjusted for age and sex, in never smokers**

| Outcome                                                                                                                                                         | Cohort                              | Regression Coefficient (95% CI) |                             |                             |                             |                             |
|-----------------------------------------------------------------------------------------------------------------------------------------------------------------|-------------------------------------|---------------------------------|-----------------------------|-----------------------------|-----------------------------|-----------------------------|
|                                                                                                                                                                 |                                     | MS VS. MM                       | MZ VS. MM                   | SS VS. MM                   | SZ VS. MM                   | ZZ VS. MM                   |
| Maximum FEV1                                                                                                                                                    | Combined Fixed Effect               | 0.07*(0.01,0.13)                | 0.12**(0.03,0.21)           | -0.11(-0.45,0.24)           | -0.17(-0.51,0.17)           | 0.41(-0.39,1.22)            |
|                                                                                                                                                                 | Combined Random Effect              | 0.07*(0.01,0.13)                | 0.11*(0.03,0.20)            | -0.11(-0.46,0.23)           | -0.14(-0.48,0.19)           | 0.40(-0.44,1.25)            |
|                                                                                                                                                                 | Estimated variance of random effect | 7.06e-20(4.51e-35,1.10e-04)     | 4.35e-22(9.47e-38,2.00e-06) | 4.86e-18(1.28e-36,1.85e+01) | 1.01e-20(2.68e-37,3.79e-04) | 1.14e-16(0.00e+00,.)        |
| Maximum FVC                                                                                                                                                     | Combined Fixed Effect               | 0.05(-0.01,0.11)                | 0.12**(0.04,0.21)           | -0.19(-0.53,0.16)           | -0.14(-0.48,0.19)           | 0.45(-0.35,1.25)            |
|                                                                                                                                                                 | Combined Random Effect              | 0.05(-0.01,0.11)                | 0.12**(0.03,0.21)           | -0.18(-0.52,0.16)           | -0.13(-0.45,0.20)           | 0.46(-0.38,1.30)            |
|                                                                                                                                                                 | Estimated variance of random effect | 1.07e-23(7.42e-39,1.53e-08)     | 7.43e-19(1.26e-30,4.38e-07) | 1.14e-19(1.06e-38,1.22e+00) | 7.52e-22(3.15e-42,1.80e-01) | 8.56e-20(2.12e-40,3.47e+01) |
| FEV1/FVC ratio                                                                                                                                                  | Combined Fixed Effect               | 0.03(-0.06,0.11)                | -0.02(-0.14,0.10)           | 0.14(-0.32,0.60)            | -0.02(-0.47,0.42)           | -0.05(-1.11,1.02)           |
|                                                                                                                                                                 | Combined Random Effect              | 0.01(-0.07,0.09)                | -0.02(-0.14,0.10)           | 0.10(-0.36,0.56)            | 0.01(-0.41,0.43)            | 0.01(-1.03,1.05)            |
|                                                                                                                                                                 | Estimated variance of random effect | 7.19e-04(1.55e-09,3.34e+02)     | 2.25e-03(1.28e-07,3.96e+01) | 6.94e-22(4.79e-41,1.00e-02) | 4.75e-12(3.46e-30,6.51e+06) | 1.19e-15(6.57e-39,2.17e+08) |
| Outcomes z-scored within cohorts<br>Cohort specific estimates are suppressed due to the small number of carriers<br>*p<0.05, **p<0.01, ***p<0.001, ****p<0.0001 |                                     |                                 |                             |                             |                             |                             |



**S4 Table. Association of PI status with transformed lung function, adjusted for age and sex, in never smokers**

| Outcome                                                                                                                                                         | Cohort                              | Regression Coefficient (95% CI) |                             |                             |                             |                             |
|-----------------------------------------------------------------------------------------------------------------------------------------------------------------|-------------------------------------|---------------------------------|-----------------------------|-----------------------------|-----------------------------|-----------------------------|
|                                                                                                                                                                 |                                     | MS VS. MM                       | MZ VS. MM                   | SS VS. MM                   | SZ VS. MM                   | ZZ VS. MM                   |
| Sqrt(Maximum FVC)                                                                                                                                               | Combined Fixed Effect               | 0.05(-0.01,0.11)                | 0.12**(0.04,0.21)           | -0.18(-0.53,0.16)           | -0.12(-0.46,0.21)           | 0.51(-0.29,1.30)            |
|                                                                                                                                                                 | Combined Random Effect              | 0.05(-0.01,0.11)                | 0.12**(0.03,0.20)           | -0.20(-0.53,0.14)           | -0.10(-0.42,0.22)           | 0.52(-0.31,1.35)            |
|                                                                                                                                                                 | Estimated variance of random effect | 1.07e-23(1.46e-38,7.87e-09)     | 6.42e-19(8.06e-35,5.12e-03) | 1.70e-20(3.41e-38,8.53e-03) | 3.74e-21(4.78e-36,2.92e-06) | 9.35e-18(5.78e-38,1.51e+03) |
| (FEV1/FVC ratio) <sup>3</sup>                                                                                                                                   | Combined Fixed Effect               | 0.01(-0.08,0.09)                | -0.02(-0.14,0.10)           | 0.09(-0.38,0.56)            | -0.09(-0.55,0.36)           | -0.17(-1.26,0.92)           |
|                                                                                                                                                                 | Combined Random Effect              | -0.00(-0.09,0.08)               | -0.03(-0.16,0.10)           | 0.05(-0.42,0.53)            | -0.13(-0.63,0.37)           | -0.14(-1.21,0.93)           |
|                                                                                                                                                                 | Estimated variance of random effect | 7.63e-04(7.09e-10,8.22e+02)     | 3.46e-03(2.47e-06,4.85e+00) | 7.76e-17(6.18e-35,9.74e+01) | 5.94e-02(1.54e-04,2.28e+01) | 5.75e-17(3.92e-36,8.43e+02) |
| Outcomes z-scored within cohorts<br>Cohort specific estimates are suppressed due to the small number of carriers<br>*p<0.05, **p<0.01, ***p<0.001, ****p<0.0001 |                                     |                                 |                             |                             |                             |                             |

**S5 Table. Association of PI status with lung function, adjusted for age and sex, in COPD cases**

| Outcome                                                                                                                                                                                                                                                                                                   | Cohort                              | Regression Coefficient (95% CI) |                             |
|-----------------------------------------------------------------------------------------------------------------------------------------------------------------------------------------------------------------------------------------------------------------------------------------------------------|-------------------------------------|---------------------------------|-----------------------------|
|                                                                                                                                                                                                                                                                                                           |                                     | MS VS. MM                       | MZ VS. MM                   |
| Maximum FEV1                                                                                                                                                                                                                                                                                              | Combined Fixed Effect               | 0.06(-0.05,0.18)                | 0.01(-0.15,0.18)            |
|                                                                                                                                                                                                                                                                                                           | Combined Random Effect              | 0.04(-0.07,0.15)                | -0.00(-0.17,0.16)           |
|                                                                                                                                                                                                                                                                                                           | Estimated variance of random effect | 5.22e-20(1.89e-33,1.44e-06)     | 1.87e-20(2.05e-37,1.71e-03) |
| Maximum FVC                                                                                                                                                                                                                                                                                               | Combined Fixed Effect               | -0.04(-0.18,0.09)               | 0.12(-0.08,0.32)            |
|                                                                                                                                                                                                                                                                                                           | Combined Random Effect              | -0.05(-0.18,0.08)               | 0.10(-0.10,0.29)            |
|                                                                                                                                                                                                                                                                                                           | Estimated variance of random effect | 4.09e-18(5.45e-32,3.07e-04)     | 3.97e-15(2.48e-30,6.34e+00) |
| FEV1/FVC ratio                                                                                                                                                                                                                                                                                            | Combined Fixed Effect               | 0.21*(0.01,0.41)                | -0.10(-0.41,0.20)           |
|                                                                                                                                                                                                                                                                                                           | Combined Random Effect              | 0.20*(0.01,0.38)                | -0.06(-0.35,0.24)           |
|                                                                                                                                                                                                                                                                                                           | Estimated variance of random effect | 1.47e-18(0.00e+00,.)            | 4.19e-23(2.04e-37,8.62e-09) |
| <p>Outcomes z-scored within cohorts<br/> Cohort specific estimates are suppressed due to the small number of carriers<br/> Meta-analyses for PI-SS, SZ and ZZ were not possible as there were fewer than three cohorts with adequate data<br/> p&lt;0.05, **p&lt;0.01, ***p&lt;0.001, ****p&lt;0.0001</p> |                                     |                                 |                             |

**S6 Table. Association of PI status with lung function adjusted for age, sex, height and height-squared**

| Outcome                             | Cohort                      | Regression Coefficient (95% CI) |                             |                             |                             |           |
|-------------------------------------|-----------------------------|---------------------------------|-----------------------------|-----------------------------|-----------------------------|-----------|
|                                     |                             | MS VS. MM                       | MZ VS. MM                   | SS VS. MM                   | SZ VS. MM                   | ZZ VS. MM |
| Maximum FEV1                        | BO                          | -0.16(-0.46,0.14)               | 0.17(-0.40,0.74)            | a                           |                             |           |
|                                     | CaPS                        | 0.05(-0.11,0.21)                | 0.09(-0.12,0.30)            |                             |                             |           |
|                                     | ELSA                        | 0.05(-0.02,0.12)                | 0.06(-0.05,0.16)            |                             |                             |           |
|                                     | HAS                         | -0.41(-0.87,0.05)               | 0.11(-0.34,0.56)            |                             |                             |           |
|                                     | HCS                         | 0.00(-0.09,0.09)                | -0.01(-0.15,0.12)           |                             |                             |           |
|                                     | LBC1921                     | -0.08(-0.31,0.16)               | 0.09(-0.27,0.44)            |                             |                             |           |
|                                     | NSHD                        | -0.02(-0.12,0.08)               | 0.08(-0.08,0.23)            |                             |                             |           |
|                                     | WHII                        | 0.04(-0.03,0.10)                | 0.11(-0.00,0.21)            |                             |                             |           |
|                                     | Combined Fixed Effect       | 0.02(-0.02,0.06)                | 0.07*(0.01,0.12)            |                             |                             |           |
| Combined Random Effect              | 0.02(-0.02,0.06)            | 0.07*(0.01,0.12)                | 0.03(-0.20,0.25)            | 0.03(-0.20,0.26)            | -0.35(-0.91,0.20)           |           |
| Estimated variance of random effect | 1.32e-13(1.51e-27,1.15e+01) | 1.03e-17(1.80e-32,5.87e-03)     | 4.91e-14(7.47e-31,3.22e+03) | 1.59e-23(5.06e-38,5.00e-09) | 1.53e-06(8.51e-32,2.74e+19) |           |
| Maximum FVC                         | BO                          | -0.11(-0.37,0.15)               | 0.06(-0.43,0.56)            | a                           |                             |           |
|                                     | CaPS                        | 0.07(-0.09,0.23)                | 0.13(-0.08,0.34)            |                             |                             |           |
|                                     | ELSA                        | 0.03(-0.04,0.09)                | 0.04(-0.06,0.14)            |                             |                             |           |
|                                     | HAS                         | -0.30(-0.69,0.09)               | 0.35(-0.04,0.74)            |                             |                             |           |
|                                     | HCS                         | -0.01(-0.08,0.07)               | 0.07(-0.05,0.18)            |                             |                             |           |
|                                     | LBC1921                     | -0.09(-0.31,0.14)               | 0.10(-0.23,0.44)            |                             |                             |           |
|                                     | NSHD                        | -0.02(-0.12,0.07)               | 0.08(-0.06,0.23)            |                             |                             |           |
|                                     | WHII                        | -0.02(-0.08,0.05)               | 0.10(-0.00,0.20)            |                             |                             |           |
|                                     | Combined Fixed Effect       | -0.00(-0.04,0.03)               | 0.08**(0.03,0.13)           |                             |                             |           |
| Combined Random Effect              | -0.01(-0.04,0.03)           | 0.08**(0.03,0.13)               | -0.10(-0.30,0.11)           | 0.01(-0.20,0.22)            | -0.19(-0.71,0.34)           |           |
| Estimated variance of random effect | 6.12e-14(3.19e-29,1.17e+02) | 1.25e-13(5.20e-27,3.01e+00)     | 9.71e-17(8.57e-33,1.10e+00) | 8.32e-19(3.11e-33,2.22e-04) | 1.31e-14(4.02e-33,4.26e+04) |           |

|                                                                                                                                                                                        |                                           |                             |                             |                             |                             |                             |
|----------------------------------------------------------------------------------------------------------------------------------------------------------------------------------------|-------------------------------------------|-----------------------------|-----------------------------|-----------------------------|-----------------------------|-----------------------------|
| FEV1/FV<br>C ratio                                                                                                                                                                     | BO                                        | -0.28(-0.70,0.14)           | 0.26(-0.55,1.07)            | a                           |                             |                             |
|                                                                                                                                                                                        | CaPS                                      | 0.01(-0.16,0.18)            | 0.02(-0.20,0.25)            |                             |                             |                             |
|                                                                                                                                                                                        | ELSA                                      | 0.04(-0.06,0.14)            | 0.02(-0.12,0.17)            |                             |                             |                             |
|                                                                                                                                                                                        | HAS                                       | -0.20(-0.80,0.40)           | -0.28(-0.84,0.28)           |                             |                             |                             |
|                                                                                                                                                                                        | HCS                                       | 0.03(-0.10,0.15)            | -0.12(-0.31,0.07)           |                             |                             |                             |
|                                                                                                                                                                                        | LBC1921                                   | -0.01(-0.34,0.31)           | -0.13(-0.63,0.36)           |                             |                             |                             |
|                                                                                                                                                                                        | NSHD                                      | -0.01(-0.16,0.13)           | -0.06(-0.28,0.16)           |                             |                             |                             |
|                                                                                                                                                                                        | WHII                                      | 0.11*(0.01,0.21)            | 0.03(-0.13,0.19)            |                             |                             |                             |
|                                                                                                                                                                                        | Combined<br>Fixed Effect                  | 0.04(-0.01,0.09)            | -0.02(-0.10,0.06)           |                             |                             |                             |
|                                                                                                                                                                                        | Combined<br>Random Effect                 | 0.04(-0.01,0.09)            | -0.02(-0.10,0.06)           | 0.23(-0.09,0.55)            | 0.02(-0.30,0.33)            | -0.55(-1.41,0.32)           |
|                                                                                                                                                                                        | Estimated<br>variance of<br>random effect | 2.26e-21(9.99e-37,5.13e-06) | 2.27e-17(1.70e-30,3.03e-04) | 1.15e-17(1.90e-33,6.99e-02) | 1.19e-19(1.19e-37,1.19e-01) | 1.23e-01(5.10e-05,2.97e+02) |
| Outcomes z-scored within cohorts<br>*p<0.05, **p<0.01, ***p<0.001, ****p<0.0001<br>a Cohort specific estimates are suppressed for PI-SS, SZ and ZZ due to the small number of carriers |                                           |                             |                             |                             |                             |                             |

**S7 Table. Association of PI status with lung function adjusted for age, sex, height and height-squared, outcomes transformed**

| Outcome                             | Cohort                      | Regression Coefficient (95% CI) |                             |                      |                             |           |
|-------------------------------------|-----------------------------|---------------------------------|-----------------------------|----------------------|-----------------------------|-----------|
|                                     |                             | MS VS. MM                       | MZ VS. MM                   | SS VS. MM            | SZ VS. MM                   | ZZ VS. MM |
| Sqrt(Maximum FVC)                   | BO                          | -0.15(-0.42,0.11)               | 0.07(-0.44,0.58)            | b                    |                             |           |
|                                     | CaPS                        | 0.06(-0.09,0.22)                | 0.11(-0.10,0.32)            |                      |                             |           |
|                                     | ELSA                        | 0.02(-0.04,0.09)                | 0.03(-0.07,0.13)            |                      |                             |           |
|                                     | HAS                         | -0.29(-0.68,0.10)               | 0.33(-0.06,0.72)            |                      |                             |           |
|                                     | HCS                         | -0.00(-0.08,0.07)               | 0.06(-0.06,0.17)            |                      |                             |           |
|                                     | LBC1921                     | -0.10(-0.33,0.13)               | 0.10(-0.25,0.44)            |                      |                             |           |
|                                     | NSHD                        | -0.02(-0.11,0.08)               | 0.09(-0.06,0.23)            |                      |                             |           |
|                                     | WHII                        | -0.02(-0.08,0.04)               | 0.09(-0.00,0.19)            |                      |                             |           |
|                                     | Combined Fixed Effect       | -0.00(-0.04,0.03)               | 0.07**(0.02,0.12)           |                      |                             |           |
| Combined Random Effect              | -0.01(-0.04,0.03)           | 0.07**(0.02,0.12)               | -0.09(-0.29,0.12)           | 0.02(-0.19,0.23)     | -0.20(-0.71,0.32)           |           |
| Estimated variance of random effect | 2.16e-20(3.13e-36,1.49e-04) | 6.57e-18(0.00e+00,,)            | 8.37e-16(2.36e-30,2.97e-01) | 3.40e-17(0.00e+00,,) | 1.51e-16(6.00e-34,3.79e+01) |           |
| (FEV1/FVC ratio) <sup>3</sup>       | BO                          | -0.25(-0.68,0.18)               | 0.21(-0.62,1.04)            | b                    |                             |           |
|                                     | CaPS                        | -0.01(-0.19,0.16)               | 0.01(-0.22,0.25)            |                      |                             |           |
|                                     | ELSA                        | 0.04(-0.06,0.13)                | 0.04(-0.10,0.19)            |                      |                             |           |
|                                     | HAS                         | -0.11(-0.69,0.47)               | -0.37(-0.93,0.20)           |                      |                             |           |
|                                     | HCS                         | 0.01(-0.11,0.14)                | -0.06(-0.25,0.12)           |                      |                             |           |
|                                     | LBC1921                     | -0.06(-0.38,0.27)               | -0.12(-0.61,0.37)           |                      |                             |           |
|                                     | NSHD                        | -0.02(-0.16,0.13)               | -0.10(-0.32,0.12)           |                      |                             |           |
|                                     | WHII                        | 0.10*(0.00,0.21)                | 0.05(-0.11,0.21)            |                      |                             |           |
|                                     | Combined Fixed Effect       | 0.03(-0.02,0.08)                | -0.01(-0.08,0.07)           |                      |                             |           |

|  |                                     |                             |                             |                             |                            |                             |
|--|-------------------------------------|-----------------------------|-----------------------------|-----------------------------|----------------------------|-----------------------------|
|  | Combined Random Effect              | 0.03(-0.02,0.08)            | -0.01(-0.08,0.07)           | 0.18(-0.13,0.50)            | NOCONVERGENCE <sup>a</sup> | -0.56(-1.33,0.22)           |
|  | Estimated variance of random effect | 2.70e-21(3.30e-35,2.22e-07) | 1.26e-17(7.38e-31,2.15e-04) | 1.82e-19(1.20e-35,2.78e-03) | NOCONVERGENCE <sup>a</sup> | 5.89e-12(9.75e-32,3.56e+08) |

Outcomes z-scored within cohorts

\*p<0.05, \*\*p<0.01, \*\*\*p<0.001, \*\*\*\*p<0.0001

<sup>a</sup> Random effects model failed to converge

<sup>b</sup> Cohort specific estimates are suppressed for PI-SS, SZ and ZZ due to the small number of carriers

**S8 Table. Association of PI status with lung function, adjusted for age, sex, height, height-squared and smoking status in COPD cases**

| Outcome                                                                                                                                                                                                                                                                                                                                                                | Cohort                              | Regression Coefficient (95% CI) |                             |
|------------------------------------------------------------------------------------------------------------------------------------------------------------------------------------------------------------------------------------------------------------------------------------------------------------------------------------------------------------------------|-------------------------------------|---------------------------------|-----------------------------|
|                                                                                                                                                                                                                                                                                                                                                                        |                                     | MS VS. MM                       | MZ VS. MM                   |
| Maximum FEV1                                                                                                                                                                                                                                                                                                                                                           | Combined Fixed Effect               | 0.06(-0.05,0.17)                | -0.02(-0.18,0.14)           |
|                                                                                                                                                                                                                                                                                                                                                                        | Combined Random Effect              | 0.04(-0.07,0.14)                | -0.05(-0.20,0.11)           |
|                                                                                                                                                                                                                                                                                                                                                                        | Estimated variance of random effect | 1.86e-20(4.01e-36,8.62e-05)     | 1.06e-18(1.27e-32,8.95e-05) |
| Maximum FVC                                                                                                                                                                                                                                                                                                                                                            | Combined Fixed Effect               | -0.06(-0.19,0.06)               | 0.06(-0.13,0.25)            |
|                                                                                                                                                                                                                                                                                                                                                                        | Combined Random Effect              | -0.06(-0.18,0.06)               | 0.04(-0.14,0.21)            |
|                                                                                                                                                                                                                                                                                                                                                                        | Estimated variance of random effect | 3.06e-24(1.30e-36,7.19e-12)     | 6.24e-21(2.66e-37,1.47e-04) |
| FEV1/FVC ratio                                                                                                                                                                                                                                                                                                                                                         | Combined Fixed Effect               | 0.23*(0.02,0.43)                | -0.09(-0.40,0.21)           |
|                                                                                                                                                                                                                                                                                                                                                                        | Combined Random Effect              | 0.22*(0.04,0.41)                | -0.05(-0.35,0.24)           |
|                                                                                                                                                                                                                                                                                                                                                                        | Estimated variance of random effect | 1.63e-21(6.35e-35,4.20e-08)     | 1.25e-18(4.60e-33,3.42e-04) |
| <p>Outcomes z-scored within cohorts<br/>                     Cohort specific estimates are suppressed due to the small number of carriers<br/>                     Meta-analyses for PI-SS, SZ and ZZ were not possible as there were fewer than three cohorts with adequate data *p&lt;0.05,<br/>                     **p&lt;0.01, ***p&lt;0.001, ****p&lt;0.0001</p> |                                     |                                 |                             |

**S20 Table. Association of PI status with lung function, adjusted for age and sex, in COPD cases with outcomes transformed**

| Outcome                                                                                                                                                                                                                                                                           | Cohort                              | Regression Coefficient (95% CI) |                             |
|-----------------------------------------------------------------------------------------------------------------------------------------------------------------------------------------------------------------------------------------------------------------------------------|-------------------------------------|---------------------------------|-----------------------------|
|                                                                                                                                                                                                                                                                                   |                                     | MS VS. MM                       | MZ VS. MM                   |
| Sqrt(Maximum FVC)                                                                                                                                                                                                                                                                 | Combined Fixed Effect               | -0.05(-0.19,0.09)               | 0.12(-0.09,0.33)            |
|                                                                                                                                                                                                                                                                                   | Combined Random Effect              | -0.05(-0.19,0.08)               | 0.10(-0.11,0.30)            |
|                                                                                                                                                                                                                                                                                   | Estimated variance of random effect | 1.50e-20(1.42e-35,1.59e-05)     | 6.87e-13(1.79e-31,2.64e+06) |
| (FEV1/FVC ratio) <sup>3</sup>                                                                                                                                                                                                                                                     | Combined Fixed Effect               | 0.12*(0.02,0.22)                | -0.05(-0.19,0.10)           |
|                                                                                                                                                                                                                                                                                   | Combined Random Effect              | 0.11*(0.02,0.20)                | 0.00(-0.14,0.14)            |
|                                                                                                                                                                                                                                                                                   | Estimated variance of random effect | 1.24e-20(9.41e-49,1.63e+08)     | 4.31e-19(9.86e-38,1.88e+00) |
| Outcomes z-scored within cohorts<br>Cohort specific estimates are suppressed due to the small number of carriers<br>Meta-analyses for PI-SS, SZ and ZZ were not possible as there were fewer than three cohorts with adequate data<br>*p<0.05, **p<0.01, ***p<0.001, ****p<0.0001 |                                     |                                 |                             |



**S21 Table. Association of PI-MZ with lung function with +/-3SDs removed from outcome before standardisation, adjusted for age, sex, height and height-squared**

| Outcome                                     | Cohort                              | Regression Coefficient (95% CI) |
|---------------------------------------------|-------------------------------------|---------------------------------|
| Maximum FEV1                                | Combined Fixed Effect               | 0.07*(0.01,0.13)                |
|                                             | Combined Random Effect              | 0.07*(0.01,0.13)                |
|                                             | Estimated variance of random effect | 1.48e-18(0.00e+00,.)            |
| Maximum FVC                                 | Combined Fixed Effect               | 0.08**(0.03,0.13)               |
|                                             | Combined Random Effect              | 0.08**(0.03,0.13)               |
|                                             | Estimated variance of random effect | 1.06e-12(1.14e-25,9.94e+00)     |
| Outcomes z-scored within cohorts            |                                     |                                 |
| *p<0.05, **p<0.01, ***p<0.001, ****p<0.0001 |                                     |                                 |

**S9 Table. Association of PI status with lung function adjusted for age, sex, height, height-squared and height-cubed**

| Outcome                | Cohort                              | Regression Coefficient (95% CI) |                             |                             |                             |                             |
|------------------------|-------------------------------------|---------------------------------|-----------------------------|-----------------------------|-----------------------------|-----------------------------|
|                        |                                     | MS VS. MM                       | MZ VS. MM                   | SS VS. MM                   | SZ VS. MM                   | ZZ VS. MM                   |
| Maximum FEV1           | BO                                  | -0.18(-0.48,0.12)               | 0.16(-0.41,0.73)            | a                           |                             |                             |
|                        | CaPS                                | 0.05(-0.11,0.21)                | 0.09(-0.12,0.30)            |                             |                             |                             |
|                        | ELSA                                | 0.05(-0.02,0.12)                | 0.06(-0.04,0.17)            |                             |                             |                             |
|                        | HAS                                 | -0.41(-0.87,0.05)               | 0.10(-0.35,0.56)            |                             |                             |                             |
|                        | HCS                                 | 0.00(-0.09,0.09)                | -0.01(-0.15,0.12)           |                             |                             |                             |
|                        | LBC1921                             | -0.08(-0.31,0.16)               | 0.08(-0.27,0.44)            |                             |                             |                             |
|                        | NSHD                                | -0.02(-0.12,0.08)               | 0.08(-0.08,0.23)            |                             |                             |                             |
|                        | WHII                                | 0.04(-0.03,0.10)                | 0.11(-0.00,0.21)            |                             |                             |                             |
|                        | Combined Fixed Effect               | 0.02(-0.02,0.06)                | 0.07*(0.01,0.12)            |                             |                             |                             |
| Combined Random Effect | 0.02(-0.02,0.06)                    | 0.07*(0.01,0.12)                | 0.03(-0.20,0.25)            | 0.03(-0.20,0.26)            | -0.35(-0.91,0.21)           |                             |
|                        | Estimated variance of random effect | 9.32e-18(7.18e-30,1.21e-05)     | 1.66e-19(6.53e-35,4.20e-04) | 2.85e-15(4.20e-32,1.93e+02) | 8.24e-16(4.26e-30,1.59e-01) | 3.10e-12(4.97e-33,1.93e+09) |
| Maximum FVC            | BO                                  | -0.12(-0.38,0.14)               | 0.07(-0.43,0.57)            | a                           |                             |                             |
|                        | CaPS                                | 0.07(-0.09,0.23)                | 0.13(-0.08,0.34)            |                             |                             |                             |
|                        | ELSA                                | 0.03(-0.04,0.09)                | 0.04(-0.06,0.14)            |                             |                             |                             |
|                        | HAS                                 | -0.30(-0.69,0.09)               | 0.34(-0.06,0.73)            |                             |                             |                             |
|                        | HCS                                 | -0.01(-0.08,0.07)               | 0.07(-0.05,0.18)            |                             |                             |                             |
|                        | LBC1921                             | -0.09(-0.31,0.14)               | 0.11(-0.23,0.44)            |                             |                             |                             |
|                        | NSHD                                | -0.02(-0.12,0.07)               | 0.08(-0.06,0.23)            |                             |                             |                             |
|                        | WHII                                | -0.02(-0.08,0.05)               | 0.10(-0.00,0.20)            |                             |                             |                             |
|                        | Combined Fixed Effect               | -0.00(-0.04,0.03)               | 0.08**(0.03,0.14)           |                             |                             |                             |
| Combined Random Effect | -0.01(-0.04,0.03)                   | 0.08**(0.03,0.13)               | -0.10(-0.30,0.11)           | 0.02(-0.19,0.23)            | -0.18(-0.71,0.34)           |                             |
|                        | Estimated variance of random effect | 4.40e-16(9.54e-32,2.02e+00)     | 7.69e-14(4.31e-27,1.37e+00) | 4.85e-15(3.28e-31,7.17e+01) | 1.66e-13(7.47e-30,3.68e+03) | 7.50e-16(2.11e-35,2.67e+04) |

|                                                                                                     |                                     |                             |                      |                             |                             |                             |
|-----------------------------------------------------------------------------------------------------|-------------------------------------|-----------------------------|----------------------|-----------------------------|-----------------------------|-----------------------------|
| FEV1/FVC ratio                                                                                      | BO                                  | -0.31(-0.74,0.11)           | 0.23(-0.58,1.04)     | a                           |                             |                             |
|                                                                                                     | CaPS                                | 0.01(-0.16,0.18)            | 0.02(-0.20,0.25)     |                             |                             |                             |
|                                                                                                     | ELSA                                | 0.04(-0.06,0.14)            | 0.02(-0.12,0.17)     |                             |                             |                             |
|                                                                                                     | HAS                                 | -0.19(-0.79,0.41)           | -0.27(-0.83,0.30)    |                             |                             |                             |
|                                                                                                     | HCS                                 | 0.03(-0.10,0.15)            | -0.12(-0.31,0.07)    |                             |                             |                             |
|                                                                                                     | LBC1921                             | -0.01(-0.34,0.31)           | -0.14(-0.64,0.36)    |                             |                             |                             |
|                                                                                                     | NSHD                                | -0.01(-0.16,0.13)           | -0.06(-0.28,0.16)    |                             |                             |                             |
|                                                                                                     | WHII                                | 0.11*(0.01,0.21)            | 0.03(-0.13,0.19)     |                             |                             |                             |
|                                                                                                     | Combined Fixed Effect               | 0.04(-0.01,0.09)            | -0.02(-0.10,0.06)    | 0.23(-0.08,0.55)            | 0.02(-0.30,0.33)            | -0.67(-1.46,0.11)           |
|                                                                                                     | Combined Random Effect              | 0.04(-0.01,0.09)            | -0.02(-0.10,0.06)    | 0.23(-0.09,0.55)            | 0.02(-0.30,0.33)            | -0.55(-1.41,0.32)           |
|                                                                                                     | Estimated variance of random effect | 5.96e-19(1.82e-32,1.95e-05) | 5.70e-14(0.00e+00,,) | 1.50e-16(9.10e-31,2.48e-02) | 9.05e-11(1.38e-27,5.94e+06) | 1.22e-01(4.76e-05,3.13e+02) |
| Outcomes z-scored within cohorts                                                                    |                                     |                             |                      |                             |                             |                             |
| *p<0.05, **p<0.01, ***p<0.001, ****p<0.0001                                                         |                                     |                             |                      |                             |                             |                             |
| a Cohort specific estimates are suppressed for PI-SS, SZ and ZZ due to the small number of carriers |                                     |                             |                      |                             |                             |                             |

**S10 Table. Association of PI status with lung function adjusted for age, sex, height, height-squared and height-cubed, outcomes transformed**

| Outcome                                                                                             | Cohort                      | Regression Coefficient (95% CI) |                             |                             |                             |           |
|-----------------------------------------------------------------------------------------------------|-----------------------------|---------------------------------|-----------------------------|-----------------------------|-----------------------------|-----------|
|                                                                                                     |                             | MS VS. MM                       | MZ VS. MM                   | SS VS. MM                   | SZ VS. MM                   | ZZ VS. MM |
| Sqrt(Maximum FVC)                                                                                   | BO                          | -0.16(-0.43,0.11)               | 0.08(-0.43,0.59)            | a                           |                             |           |
|                                                                                                     | CaPS                        | 0.06(-0.09,0.22)                | 0.11(-0.09,0.32)            |                             |                             |           |
|                                                                                                     | ELSA                        | 0.02(-0.04,0.09)                | 0.03(-0.07,0.13)            |                             |                             |           |
|                                                                                                     | HAS                         | -0.29(-0.68,0.10)               | 0.32(-0.07,0.71)            |                             |                             |           |
|                                                                                                     | HCS                         | -0.00(-0.08,0.07)               | 0.06(-0.06,0.17)            |                             |                             |           |
|                                                                                                     | LBC1921                     | -0.10(-0.33,0.13)               | 0.10(-0.24,0.44)            |                             |                             |           |
|                                                                                                     | NSHD                        | -0.02(-0.11,0.08)               | 0.09(-0.05,0.23)            |                             |                             |           |
|                                                                                                     | WHII                        | -0.02(-0.08,0.04)               | 0.09(-0.00,0.19)            |                             |                             |           |
|                                                                                                     | Combined Fixed Effect       | -0.00(-0.04,0.03)               | 0.07**(0.02,0.13)           |                             |                             |           |
| Combined Random Effect                                                                              | -0.01(-0.04,0.03)           | 0.07**(0.02,0.12)               | -0.09(-0.29,0.12)           | 0.02(-0.19,0.23)            | -0.19(-0.71,0.32)           |           |
| Estimated variance of random effect                                                                 | 1.85e-19(7.62e-32,4.47e-07) | 3.78e-16(4.59e-31,3.11e-01)     | 3.68e-15(3.95e-33,3.43e+03) | 1.22e-13(5.83e-28,2.54e+01) | 2.38e-15(0.00e+00,..)       |           |
| (FEV1/FVC ratio) <sup>3</sup>                                                                       | BO                          | -0.29(-0.71,0.14)               | 0.17(-0.66,1.00)            | a                           |                             |           |
|                                                                                                     | CaPS                        | -0.01(-0.19,0.16)               | 0.01(-0.22,0.25)            |                             |                             |           |
|                                                                                                     | ELSA                        | 0.04(-0.06,0.13)                | 0.04(-0.10,0.19)            |                             |                             |           |
|                                                                                                     | HAS                         | -0.10(-0.68,0.48)               | -0.35(-0.92,0.22)           |                             |                             |           |
|                                                                                                     | HCS                         | 0.01(-0.11,0.14)                | -0.06(-0.25,0.12)           |                             |                             |           |
|                                                                                                     | LBC1921                     | -0.06(-0.38,0.27)               | -0.13(-0.63,0.36)           |                             |                             |           |
|                                                                                                     | NSHD                        | -0.02(-0.16,0.13)               | -0.10(-0.32,0.12)           |                             |                             |           |
|                                                                                                     | WHII                        | 0.10*(0.00,0.21)                | 0.05(-0.11,0.21)            |                             |                             |           |
|                                                                                                     | Combined Fixed Effect       | 0.03(-0.02,0.08)                | -0.01(-0.08,0.07)           |                             |                             |           |
| Combined Random Effect                                                                              | 0.03(-0.02,0.08)            | -0.01(-0.08,0.07)               | 0.19(-0.13,0.50)            | -0.05(-0.38,0.27)           | -0.55(-1.33,0.22)           |           |
| Estimated variance of random effect                                                                 | 1.01e-18(8.43e-33,1.20e-04) | 1.64e-16(1.28e-28,2.10e-04)     | 1.34e-17(1.32e-35,1.36e+01) | 4.00e-03(3.93e-07,4.08e+01) | 5.34e-12(2.39e-31,1.19e+08) |           |
| Outcomes z-scored within cohorts                                                                    |                             |                                 |                             |                             |                             |           |
| *p<0.05, **p<0.01, ***p<0.001, ****p<0.0001                                                         |                             |                                 |                             |                             |                             |           |
| a Cohort specific estimates are suppressed for PI-SS, SZ and ZZ due to the small number of carriers |                             |                                 |                             |                             |                             |           |

**S11 Table. Association of PI status with physical capability, adjusted for age and sex**

| Outcome          | Cohort                              | Coefficient <sup>d</sup> (95% CI)   |                             |                             |                             |
|------------------|-------------------------------------|-------------------------------------|-----------------------------|-----------------------------|-----------------------------|
|                  |                                     | MS VS. MM                           | MZ VS. MM                   | SS VS. MM                   | SZ VS. MM                   |
| Grip strength    | ELSA                                | -0.00(-0.06,0.05)                   | -0.02(-0.11,0.06)           | c                           |                             |
|                  | HAS                                 | 0.02(-0.17,0.21)                    | 0.07(-0.18,0.33)            |                             |                             |
|                  | HCS                                 | 0.01(-0.07,0.08)                    | 0.12*(0.01,0.23)            |                             |                             |
|                  | LBC1921                             | -0.12(-0.33,0.08)                   | 0.29(-0.02,0.60)            |                             |                             |
|                  | NSHD                                | 0.05(-0.04,0.15)                    | 0.13(-0.01,0.27)            |                             |                             |
|                  | Combined Fixed Effect               | 0.01(-0.03,0.05)                    | 0.06*(0.01,0.12)            | 0.00(-0.23,0.23)            | 0.00(-0.22,0.22)            |
|                  | Combined Random Effect              | 0.01(-0.03,0.05)                    | 0.08(-0.00,0.16)            | 0.03(-0.20,0.26)            | -0.01(-0.23,0.20)           |
|                  | Estimated variance of random effect | 3.66e-16(4.15e-37,3.23e+05)         | 2.98e-03(1.75e-04,5.08e-02) | 8.78e-10(1.18e-27,6.53e+08) | 3.66e-16(5.67e-37,2.37e+05) |
| Chair rise speed | ELSA                                | -0.04(-0.14,0.05)                   | -0.03(-0.17,0.11)           | c                           |                             |
|                  | HAS                                 | 0.21(-0.35,0.78)                    | 0.32(-0.25,0.89)            |                             |                             |
|                  | HCS                                 | -0.15(-0.31,0.02)                   | -0.01(-0.25,0.24)           |                             |                             |
|                  | NSHD                                | -0.01(-0.14,0.13)                   | 0.10(-0.09,0.30)            |                             |                             |
|                  | Combined Fixed Effect               | -0.04(-0.11,0.02)                   | 0.03(-0.07,0.13)            |                             |                             |
|                  | Combined Random Effect              | -0.05(-0.12,0.02)                   | 0.02(-0.08,0.12)            | 0.27(-0.15,0.70)            | -0.00(-0.77,0.77)           |
|                  |                                     | Estimated variance of random effect | 9.52e-16(0.00e+00,..)       | 1.02e-19(4.96e-43,2.08e+04) | 8.75e-19(2.29e-37,3.34e+00) |
| Walk speed       | ELSA                                | 0.06(-0.05,0.17)                    | 0.09(-0.07,0.25)            | c                           |                             |
|                  | HAS                                 | -0.31(-0.81,0.19)                   | 0.52(-0.00,1.05)            |                             |                             |
|                  | HCS                                 | -0.04(-0.18,0.10)                   | 0.05(-0.15,0.25)            |                             |                             |
|                  | LBC1921                             | 0.19(-0.13,0.51)                    | 0.20(-0.26,0.67)            |                             |                             |
|                  | WHII                                | -0.07(-0.16,0.01)                   | 0.03(-0.10,0.17)            |                             |                             |
|                  | Combined Fixed Effect               | -0.02(-0.08,0.03)                   | 0.07(-0.02,0.16)            | 0.16(-0.17,0.48)            | -0.28(-0.63,0.07)           |
|                  | Combined Random Effect              | -0.02(-0.09,0.05)                   | 0.07(-0.01,0.16)            | 0.15(-0.17,0.48)            | -0.32(-0.80,0.17)           |
|                  | Estimated variance of random effect | 8.25e-04(9.04e-07,7.53e-01)         | 1.65e-17(1.70e-32,1.59e-02) | 2.26e-13(4.27e-62,1.19e+36) | 1.13e-01(5.11e-03,2.51e+00) |

|                                                                                                                                                                                                                                                                                                                                                                                                                                                                                                                                                                                                                                                                                                         |                             |                               |                       |                                  |                                   |
|---------------------------------------------------------------------------------------------------------------------------------------------------------------------------------------------------------------------------------------------------------------------------------------------------------------------------------------------------------------------------------------------------------------------------------------------------------------------------------------------------------------------------------------------------------------------------------------------------------------------------------------------------------------------------------------------------------|-----------------------------|-------------------------------|-----------------------|----------------------------------|-----------------------------------|
| TUG speed                                                                                                                                                                                                                                                                                                                                                                                                                                                                                                                                                                                                                                                                                               | BO                          | -0.08(-0.48,0.32)             | 0.70(-0.07,1.48)      | c                                |                                   |
|                                                                                                                                                                                                                                                                                                                                                                                                                                                                                                                                                                                                                                                                                                         | CaPS                        | -0.10(-0.33,0.14)             | -0.01(-0.34,0.31)     |                                  |                                   |
|                                                                                                                                                                                                                                                                                                                                                                                                                                                                                                                                                                                                                                                                                                         | HAS                         | -0.41(-0.88,0.07)             | 0.42(-0.09,0.93)      |                                  |                                   |
|                                                                                                                                                                                                                                                                                                                                                                                                                                                                                                                                                                                                                                                                                                         | HCS                         | -0.05(-0.19,0.09)             | 0.03(-0.17,0.24)      |                                  |                                   |
|                                                                                                                                                                                                                                                                                                                                                                                                                                                                                                                                                                                                                                                                                                         | NSHD                        | 0.09(-0.07,0.25)              | -0.00(-0.24,0.23)     |                                  |                                   |
|                                                                                                                                                                                                                                                                                                                                                                                                                                                                                                                                                                                                                                                                                                         | Combined Fixed Effect       | -0.02(-0.11,0.07)             | 0.06(-0.08,0.19)      | 0.07(-0.49,0.62)                 | -0.80**(-1.31,-0.28) <sup>d</sup> |
| Combined Random Effect                                                                                                                                                                                                                                                                                                                                                                                                                                                                                                                                                                                                                                                                                  | -0.02(-0.12,0.07)           | 0.06(-0.07,0.19)              | 0.05(-0.51,0.61)      | -0.75*(-1.32,-0.18) <sup>d</sup> |                                   |
| Estimated variance of random effect                                                                                                                                                                                                                                                                                                                                                                                                                                                                                                                                                                                                                                                                     | 6.01e-17(6.36e-46,5.68e+12) | 1.29e-12(1.15e-191,1.46e+167) | 1.27e-10 <sup>b</sup> | 6.60e-02(1.12e-04,3.87e+01)      |                                   |
| Inability to balance for 5s                                                                                                                                                                                                                                                                                                                                                                                                                                                                                                                                                                                                                                                                             | BO                          | 1.28(0.46,3.54)               | -                     | c                                |                                   |
|                                                                                                                                                                                                                                                                                                                                                                                                                                                                                                                                                                                                                                                                                                         | CaPS                        | 0.62(0.32,1.22)               | 1.26(0.56,2.81)       |                                  |                                   |
|                                                                                                                                                                                                                                                                                                                                                                                                                                                                                                                                                                                                                                                                                                         | ELSA                        | 1.21(0.89,1.65)               | 1.21(0.77,1.90)       |                                  |                                   |
|                                                                                                                                                                                                                                                                                                                                                                                                                                                                                                                                                                                                                                                                                                         | HAS                         | 2.01(0.68,5.91)               | 1.07(0.31,3.71)       |                                  |                                   |
|                                                                                                                                                                                                                                                                                                                                                                                                                                                                                                                                                                                                                                                                                                         | HCS                         | 1.08(0.69,1.69)               | 0.52(0.22,1.22)       |                                  |                                   |
|                                                                                                                                                                                                                                                                                                                                                                                                                                                                                                                                                                                                                                                                                                         | NSHD                        | 0.96(0.49,1.87)               | 0.93(0.33,2.58)       |                                  |                                   |
| Combined Fixed Effect                                                                                                                                                                                                                                                                                                                                                                                                                                                                                                                                                                                                                                                                                   | 1.09(0.88,1.35)             | 0.98(0.72,1.35)               | F3CH                  | F3CH                             |                                   |
| Combined Random Effect                                                                                                                                                                                                                                                                                                                                                                                                                                                                                                                                                                                                                                                                                  | 1.09(0.88,1.35)             | 0.98(0.72,1.35)               | F3CH                  | F3CH                             |                                   |
| Estimated variance of random effect                                                                                                                                                                                                                                                                                                                                                                                                                                                                                                                                                                                                                                                                     | 4.33e-12(0.00e+00,.)        | 2.00e-08(0.00e+00,.)          | F3CH                  | F3CH                             |                                   |
| <p>Continuous outcomes z-scored within cohorts<br/> Meta-analyses for PI-ZZ were not possible as there were fewer than three cohorts with adequate data<br/> F3CH: Fewer than 3 cohorts with adequate data to perform the meta-analysis<br/> *p&lt;0.05, **p&lt;0.01, ***p&lt;0.001, ****p&lt;0.0001<br/> <sup>a</sup> Coefficients are linear regression coefficients for continuous outcomes and odds ratios for binary outcomes<br/> <sup>b</sup> Standard error of the variance of the random effect not estimable<br/> <sup>c</sup> Cohort specific estimates are suppressed for PI-SS and SZ due to the small number of carriers<br/> <sup>d</sup> Association driven by a single observation</p> |                             |                               |                       |                                  |                                   |

**S12 Table. Number of COPD cases and non-cases in PI status – COPD analysis**

| Cohort    | Number COPD cases | Number COPD non-cases | Total |
|-----------|-------------------|-----------------------|-------|
| BO        | 35                | 227                   | 262   |
| CaPS      | 86                | 1187                  | 1273  |
| ELSA      | 486               | 4331                  | 4817  |
| HAS       | 22                | 162                   | 184   |
| HCS       | 233               | 2278                  | 2511  |
| LBC1921   | 28                | 476                   | 504   |
| NSHD      | 88                | 1892                  | 1980  |
| WHII      | 315               | 3917                  | 4232  |
| Total     | 1293              | 14470                 | 15763 |
| Total (%) | 8.20              | 91.80                 | 100   |

Numbers based on individuals with a valid PI status, age, sex, height and lung function measures

**S13 Table. Association of PI status with COPD status, adjusted for age and sex**

| Cohort                                                                                                                                                                                                                                                                     | OR for COPD <sup>a</sup> (95% CI) |                      |
|----------------------------------------------------------------------------------------------------------------------------------------------------------------------------------------------------------------------------------------------------------------------------|-----------------------------------|----------------------|
|                                                                                                                                                                                                                                                                            | MS VS. MM                         | MZ VS. MM            |
| BO                                                                                                                                                                                                                                                                         | 2.32(0.84,6.36)                   | -                    |
| CaPS                                                                                                                                                                                                                                                                       | 1.02(0.48,2.18)                   | 0.94(0.33,2.67)      |
| ELSA                                                                                                                                                                                                                                                                       | 1.05(0.76,1.46)                   | 1.08(0.67,1.73)      |
| HAS                                                                                                                                                                                                                                                                        | 1.39(0.28,6.82)                   | 0.66(0.08,5.43)      |
| HCS                                                                                                                                                                                                                                                                        | 0.92(0.58,1.47)                   | 1.27(0.70,2.31)      |
| LBC1921                                                                                                                                                                                                                                                                    | 0.87(0.20,3.81)                   | 1.14(0.14,9.09)      |
| NSHD                                                                                                                                                                                                                                                                       | 1.40(0.75,2.64)                   | -                    |
| WHII                                                                                                                                                                                                                                                                       | 0.65(0.41,1.02)                   | 0.99(0.54,1.81)      |
| Combined<br>Fixed Effect                                                                                                                                                                                                                                                   | 0.97(0.79,1.18)                   | 0.98(0.73,1.31)      |
| Combined<br>Random Effect                                                                                                                                                                                                                                                  | 0.97(0.79,1.18)                   | 0.98(0.73,1.31)      |
| Estimated<br>variance of<br>random effect                                                                                                                                                                                                                                  | 2.23e-07(0.00e+00,.)              | 3.76e-17(0.00e+00,.) |
| <p>Meta-analyses for PI-SS, SZ and ZZ were not possible as there were fewer than three cohorts with adequate data<br/>           *p&lt;0.05, **p&lt;0.01, ***p&lt;0.001, ****p&lt;0.0001<br/> <sup>a</sup> Coefficient is odds ratio for COPD in PI class versus PI-MM</p> |                                   |                      |



**S14 Table. Association of PI status with height (cm) adjusted for age and sex**

| Cohort                                                                                              | Regression Coefficient (95% CI) |                             |                             |                             |                             |
|-----------------------------------------------------------------------------------------------------|---------------------------------|-----------------------------|-----------------------------|-----------------------------|-----------------------------|
|                                                                                                     | MS VS. MM                       | MZ VS. MM                   | SS VS. MM                   | SZ VS. MM                   | ZZ VS. MM                   |
| BO                                                                                                  | 2.31(-0.24,4.86)                | 7.33**(2.36,12.30)          | a                           |                             |                             |
| CaPS                                                                                                | 0.27(-0.97,1.51)                | 0.55(-1.08,2.18)            |                             |                             |                             |
| ELSA                                                                                                | 0.20(-0.40,0.81)                | 2.02****(1.12,2.92)         |                             |                             |                             |
| HAS                                                                                                 | 0.24(-3.04,3.51)                | -0.26(-3.69,3.18)           |                             |                             |                             |
| HCS                                                                                                 | -0.10(-0.87,0.67)               | 1.23*(0.09,2.37)            |                             |                             |                             |
| LBC1921                                                                                             | 0.44(-1.55,2.43)                | 1.06(-1.89,4.00)            |                             |                             |                             |
| NSHD                                                                                                | 0.68(-0.11,1.47)                | 1.84**(0.64,3.04)           |                             |                             |                             |
| WHII                                                                                                | 0.23(-0.34,0.81)                | 1.24**(0.34,2.14)           |                             |                             |                             |
| Combined Fixed Effect                                                                               | 0.28(-0.03,0.59)                | 1.50****(1.03,1.97)         |                             |                             |                             |
| Combined Random Effect                                                                              | 0.28(-0.03,0.59)                | 1.51****(1.04,1.97)         | -1.24(-5.15,2.67)           | 1.81(-0.10,3.71)            | 2.04(-2.36,6.43)            |
| Estimated variance of random effect                                                                 | 2.77e-13(1.06e-26,7.27e+00)     | 1.67e-12(1.59e-25,1.76e+01) | 1.57e+01(2.04e+00,1.20e+02) | 2.22e-11(8.31e-27,5.92e+04) | 1.13e-11(1.32e-29,9.74e+06) |
| *p<0.05, **p<0.01, ***p<0.001, ****p<0.0001                                                         |                                 |                             |                             |                             |                             |
| a Cohort specific estimates are suppressed for PI-SS, SZ and ZZ due to the small number of carriers |                                 |                             |                             |                             |                             |

**S15 Table. Association of PI-MZ with Height, +/-3 SDs removed from outcome, adjusted for age and sex**

| Cohort                                      | Regression Coefficient (95% CI) (cm) |
|---------------------------------------------|--------------------------------------|
| Combined Fixed Effect                       | 1.53****(1.06,1.99)                  |
| Combined Random Effect                      | 1.53****(1.06,1.99)                  |
| Estimated variance of random effect         | 6.08e-11(9.70e-25,3.82e+03)          |
| *p<0.05, **p<0.01, ***p<0.001, ****p<0.0001 |                                      |

**S16 Table. Association of PI status with height, adjusted for age, sex, FEV1(z-score) and FVC(z-score)**

| Cohort                                                                                              | Regression Coefficient (95% CI) (cm) |                             |                             |                             |                             |
|-----------------------------------------------------------------------------------------------------|--------------------------------------|-----------------------------|-----------------------------|-----------------------------|-----------------------------|
|                                                                                                     | MS VS. MM                            | MZ VS. MM                   | SS VS. MM                   | SZ VS. MM                   | ZZ VS. MM                   |
| BO                                                                                                  | 2.06(-0.28,4.40)                     | 5.76*(1.22,10.29)           | a                           |                             |                             |
| CaPS                                                                                                | -0.04(-1.17,1.09)                    | -0.18(-1.66,1.31)           |                             |                             |                             |
| ELSA                                                                                                | 0.04(-0.54,0.63)                     | 1.55*** (0.69,2.40)         |                             |                             |                             |
| HAS                                                                                                 | 0.94(-2.19,4.07)                     | -1.33(-4.49,1.83)           |                             |                             |                             |
| HCS                                                                                                 | -0.06(-0.75,0.63)                    | 0.53(-0.50,1.55)            |                             |                             |                             |
| LBC1921                                                                                             | 0.75(-1.05,2.54)                     | 0.62(-2.12,3.37)            |                             |                             |                             |
| NSHD                                                                                                | 0.61(-0.20,1.42)                     | 1.20(-0.01,2.42)            |                             |                             |                             |
| WHII                                                                                                | 0.15(-0.43,0.72)                     | 0.76(-0.14,1.66)            |                             |                             |                             |
| Combined Fixed Effect                                                                               | 0.18(-0.12,0.48)                     | 0.92****(0.47,1.37)         |                             | 0.13(-1.69,1.95)            | 0.89(-0.93,2.71)            |
| Combined Random Effect                                                                              | 0.19(-0.11,0.49)                     | 0.91****(0.46,1.35)         | -0.46(-3.30,2.37)           | 0.92(-0.91,2.74)            | 1.28(-3.24,5.79)            |
| Estimated variance of random effect                                                                 | 1.25e-12(9.57e-31,1.64e+06)          | 2.70e-08(5.75e-29,1.27e+13) | 6.31e+00(3.26e-01,1.22e+02) | 5.25e-11(1.34e-25,2.05e+04) | 3.66e-11(5.11e-31,2.62e+09) |
| *p<0.05, **p<0.01, ***p<0.001, ****p<0.0001                                                         |                                      |                             |                             |                             |                             |
| a Cohort specific estimates are suppressed for PI-SS, SZ and ZZ due to the small number of carriers |                                      |                             |                             |                             |                             |

**S30 Table. Association of PI-MZ with Height, +/-3 SDs removed from outcome, adjusted for age, sex, FEV1 (z-score) and FVC (z-score)**

| Cohort                                      | Regression Coefficient (95% CI) (cm) |
|---------------------------------------------|--------------------------------------|
| Combined Fixed Effect                       | 0.96****(0.51,1.41)                  |
| Combined Random Effect                      | 0.94****(0.49,1.38)                  |
| Estimated variance of random effect         | 3.42e-07(2.24e-107,5.21e+93)         |
| *p<0.05, **p<0.01, ***p<0.001, ****p<0.0001 |                                      |

**S31 Table. Association of PI status with weight, adjusted for age and sex**

| Cohort                                                                                              | Regression Coefficient (95% CI) (kg) |                             |                             |                             |                               |
|-----------------------------------------------------------------------------------------------------|--------------------------------------|-----------------------------|-----------------------------|-----------------------------|-------------------------------|
|                                                                                                     | MS VS. MM                            | MZ VS. MM                   | SS VS. MM                   | SZ VS. MM                   | ZZ VS. MM                     |
| BO                                                                                                  | 0.70(-4.83,6.22)                     | 4.25(-6.21,14.72)           | a                           |                             |                               |
| CaPS                                                                                                | 0.27(-2.05,2.59)                     | 0.27(-2.78,3.31)            |                             |                             |                               |
| ELSA                                                                                                | 0.08(-1.21,1.38)                     | 1.05(-0.89,2.99)            |                             |                             |                               |
| HAS                                                                                                 | -0.38(-7.76,7.00)                    | -6.10(-13.96,1.77)          |                             |                             |                               |
| HCS                                                                                                 | -0.36(-1.98,1.26)                    | 0.84(-1.57,3.26)            |                             |                             |                               |
| LBC1921                                                                                             | -2.88(-6.48,0.73)                    | 3.20(-2.08,8.48)            |                             |                             |                               |
| NSHD                                                                                                | 0.13(-1.59,1.85)                     | 3.26*(0.61,5.91)            |                             |                             |                               |
| WHII                                                                                                | 0.38(-0.80,1.56)                     | 0.28(-1.58,2.13)            |                             |                             |                               |
| Combined Fixed Effect                                                                               | 0.06(-0.60,0.71)                     | 1.02*(0.04,2.01)            |                             | -2.73(-6.79,1.32)           | 1.97(-2.08,6.03)              |
| Combined Random Effect                                                                              | 0.03(-0.62,0.68)                     | 1.01*(0.03,1.99)            | -3.15(-7.19,0.88)           | 2.36(-2.41,7.14)            | -2.10(-11.21,7.00)            |
| Estimated variance of random effect                                                                 | 5.33e-13(6.25e-25,4.54e-01)          | 9.93e-15(2.68e-27,3.68e-02) | 7.92e-08(1.05e-22,5.97e+07) | 7.88e+00(8.09e-02,7.68e+02) | 1.85e-07(4.06e-176,8.46e+161) |
| *p<0.05, **p<0.01, ***p<0.001, ****p<0.0001                                                         |                                      |                             |                             |                             |                               |
| a Cohort specific estimates are suppressed for PI-SS, SZ and ZZ due to the small number of carriers |                                      |                             |                             |                             |                               |

**S17 Table. Association of PI-MZ with Weight, +/-3 SDs removed from outcome, adjusted for age and sex**

| Cohort                                      | Regression Coefficient (95% CI) (kg) |
|---------------------------------------------|--------------------------------------|
| Combined Fixed Effect                       | 0.92(-0.02,1.86)                     |
| Combined Random Effect                      | 0.95*(0.01,1.88)                     |
| Estimated variance of random effect         | 2.80e-11(4.20e-24,1.86e+02)          |
| *p<0.05, **p<0.01, ***p<0.001, ****p<0.0001 |                                      |

**S18 Table. Association of PI status with ln(weight), adjusted for age and sex**

| Cohort                                                                                              | Regression Coefficient (95% CI) |                             |                             |                             |                             |
|-----------------------------------------------------------------------------------------------------|---------------------------------|-----------------------------|-----------------------------|-----------------------------|-----------------------------|
|                                                                                                     | MS VS. MM                       | MZ VS. MM                   | SS VS. MM                   | SZ VS. MM                   | ZZ VS. MM                   |
| BO                                                                                                  | -0.00(-0.07,0.07)               | 0.06(-0.08,0.20)            | a                           |                             |                             |
| CaPS                                                                                                | 0.00(-0.03,0.03)                | 0.01(-0.03,0.05)            |                             |                             |                             |
| ELSA                                                                                                | 0.00(-0.02,0.02)                | 0.02(-0.01,0.04)            |                             |                             |                             |
| HAS                                                                                                 | -0.01(-0.11,0.09)               | -0.07(-0.17,0.04)           |                             |                             |                             |
| HCS                                                                                                 | -0.00(-0.02,0.02)               | 0.01(-0.02,0.04)            |                             |                             |                             |
| LBC1921                                                                                             | -0.04(-0.09,0.01)               | 0.05(-0.03,0.12)            |                             |                             |                             |
| NSHD                                                                                                | 0.00(-0.02,0.02)                | 0.04*(0.00,0.07)            |                             |                             |                             |
| WHII                                                                                                | 0.00(-0.01,0.02)                | 0.00(-0.02,0.03)            |                             |                             |                             |
| Combined Fixed Effect                                                                               | 0.00(-0.01,0.01)                | 0.01*(0.00,0.03)            |                             |                             |                             |
| Combined Random Effect                                                                              | 0.00(-0.01,0.01)                | 0.01*(0.00,0.03)            | -0.04(-0.09,0.02)           | 0.03(-0.03,0.09)            | -0.02(-0.13,0.10)           |
| Estimated variance of random effect                                                                 | 1.73e-19(3.95e-35,7.59e-04)     | 1.72e-19(6.57e-32,4.50e-07) | 8.89e-05(2.82e-14,2.80e+05) | 7.46e-04(5.62e-07,9.89e-01) | 2.83e-18(1.88e-41,4.27e+05) |
| Outcome is ln(weight in kg)                                                                         |                                 |                             |                             |                             |                             |
| *p<0.05, **p<0.01, ***p<0.001, ****p<0.0001                                                         |                                 |                             |                             |                             |                             |
| a Cohort specific estimates are suppressed for PI-SS, SZ and ZZ due to the small number of carriers |                                 |                             |                             |                             |                             |

**S19 Table. Association of PI status with BMI, adjusted for age and sex**

| Cohort                                                                                                         | Regression Coefficient (95% CI) (kg/m <sup>2</sup> ) |                             |                             |                             |                             |
|----------------------------------------------------------------------------------------------------------------|------------------------------------------------------|-----------------------------|-----------------------------|-----------------------------|-----------------------------|
|                                                                                                                | MS VS. MM                                            | MZ VS. MM                   | SS VS. MM                   | SZ VS. MM                   | ZZ VS. MM                   |
| BO                                                                                                             | -0.66(-2.54,1.22)                                    | -0.88(-4.50,2.73)           | <sup>a</sup>                |                             |                             |
| CaPS                                                                                                           | 0.05(-0.65,0.76)                                     | 0.02(-0.90,0.95)            |                             |                             |                             |
| ELSA                                                                                                           | 0.01(-0.44,0.46)                                     | -0.26(-0.94,0.41)           |                             |                             |                             |
| HAS                                                                                                            | -1.74(-4.28,0.79)                                    | -1.83(-4.47,0.81)           |                             |                             |                             |
| HCS                                                                                                            | -0.09(-0.63,0.46)                                    | -0.05(-0.86,0.76)           |                             |                             |                             |
| LBC1921                                                                                                        | -1.25(-2.59,0.09)                                    | 0.93(-1.04,2.90)            |                             |                             |                             |
| NSHD                                                                                                           | -0.20(-0.79,0.39)                                    | 0.51(-0.40,1.42)            |                             |                             |                             |
| WHII                                                                                                           | 0.04(-0.34,0.43)                                     | -0.27(-0.87,0.34)           |                             |                             |                             |
| Combined Fixed Effect                                                                                          | -0.08(-0.30,0.14)                                    | -0.09(-0.43,0.24)           |                             |                             |                             |
| Combined Random Effect                                                                                         | -0.08(-0.30,0.14)                                    | -0.09(-0.42,0.24)           | -0.92(-2.29,0.45)           | 0.32(-1.15,1.80)            | -1.48(-4.47,1.52)           |
| Estimated variance of random effect                                                                            | 5.69e-18(1.13e-32,2.88e-03)                          | 1.35e-18(2.10e-34,8.67e-03) | 4.65e-14(3.71e-29,5.82e+01) | 4.04e-01(8.81e-05,1.85e+03) | 2.55e-10(2.47e-28,2.63e+08) |
| *p<0.05, **p<0.01, ***p<0.001, ****p<0.0001                                                                    |                                                      |                             |                             |                             |                             |
| <sup>a</sup> Cohort specific estimates are suppressed for PI-SS, SZ and ZZ due to the small number of carriers |                                                      |                             |                             |                             |                             |



**S20 Table. Association of PI status with ln(BMI), adjusted for age and sex**

| Cohort                                                                                              | Regression Coefficient (95% CI) |                             |                             |                             |                             |
|-----------------------------------------------------------------------------------------------------|---------------------------------|-----------------------------|-----------------------------|-----------------------------|-----------------------------|
|                                                                                                     | MS VS. MM                       | MZ VS. MM                   | SS VS. MM                   | SZ VS. MM                   | ZZ VS. MM                   |
| BO                                                                                                  | -0.03(-0.10,0.04)               | -0.03(-0.16,0.10)           | a                           |                             |                             |
| CaPS                                                                                                | 0.00(-0.02,0.03)                | 0.00(-0.03,0.04)            |                             |                             |                             |
| ELSA                                                                                                | 0.00(-0.02,0.02)                | -0.01(-0.03,0.02)           |                             |                             |                             |
| HAS                                                                                                 | -0.07(-0.16,0.02)               | -0.06(-0.15,0.03)           |                             |                             |                             |
| HCS                                                                                                 | -0.00(-0.02,0.02)               | -0.00(-0.03,0.03)           |                             |                             |                             |
| LBC1921                                                                                             | -0.05(-0.10,0.00)               | 0.04(-0.04,0.11)            |                             |                             |                             |
| NSHD                                                                                                | -0.01(-0.03,0.01)               | 0.02(-0.02,0.05)            |                             |                             |                             |
| WHII                                                                                                | 0.00(-0.01,0.02)                | -0.01(-0.03,0.01)           |                             |                             |                             |
| Combined Fixed Effect                                                                               | -0.00(-0.01,0.00)               | -0.00(-0.02,0.01)           |                             |                             |                             |
| Combined Random Effect                                                                              | -0.00(-0.01,0.00)               | -0.00(-0.01,0.01)           | -0.03(-0.08,0.02)           | 0.01(-0.04,0.06)            | -0.05(-0.15,0.06)           |
| Estimated variance of random effect                                                                 | 1.09e-20(0.00e+00,.)            | 2.48e-16(2.02e-28,3.03e-04) | 1.62e-17(2.73e-33,9.64e-02) | 2.41e-04(1.27e-11,4.57e+03) | 1.95e-18(1.08e-35,3.54e-01) |
| Outcome is ln(BMI in kg/m <sup>2</sup> )                                                            |                                 |                             |                             |                             |                             |
| *p<0.05, **p<0.01, ***p<0.001, ****p<0.0001                                                         |                                 |                             |                             |                             |                             |
| a Cohort specific estimates are suppressed for PI-SS, SZ and ZZ due to the small number of carriers |                                 |                             |                             |                             |                             |

## Cystic Fibrosis

**S21 Table. Cystic fibrosis deltaF508 carrier frequency**

| Cohort   | Number of carriers <sup>a</sup> | Number of non-carriers <sup>a</sup> | Total, N <sup>a</sup> | Minor Allele Frequency | % female | Mean age (SE) |
|----------|---------------------------------|-------------------------------------|-----------------------|------------------------|----------|---------------|
| BO       | 5                               | 258                                 | 263                   | 0.010                  | 54.75    | 69.60(0.26)   |
| CaPS     | 39                              | 1254                                | 1293                  | 0.015                  | 0        | 53.80(0.14)   |
| ELSA     | 170                             | 4931                                | 5101                  | 0.017                  | 53.85    | 65.62(0.13)   |
| HAS      | 8                               | 184                                 | 192                   | 0.021                  | 34.9     | 76.36(0.16)   |
| HCS      | 70                              | 2495                                | 2565                  | 0.014                  | 47.02    | 66.09(0.06)   |
| LBC1921  | 12                              | 506                                 | 518                   | 0.012                  | 58.88    | 79.06(0.03)   |
| NSHD     | 49                              | 1912                                | 1961                  | 0.012                  | 52.07    | 53.45(0.00)   |
| WHII     | 99                              | 3314                                | 3413                  | 0.015                  | 25.99    | 60.63(0.10)   |
| Combined | 452                             | 14854                               | 15306                 | 0.015                  | 41.66    | 62.69(0.07)   |

<sup>a</sup> Total number of individuals for each mutation is total number with a valid genotype, sex, age and lung function

**S22 Table. Association of deltaF508 carrier status with lung function**

| Outcome         | Cohort                                    | Regression Coefficient (95% CI)<br>(age and sex adjusted model) | Regression Coefficient<br>(95% CI) (current<br>smokers, age and sex<br>adjusted model) | Regression<br>Coefficient (95%<br>CI) (ex smokers,<br>age and sex adjusted<br>model) | Regression<br>Coefficient (95%<br>CI) (never smokers,<br>age and sex adjusted<br>model) | Regression<br>Coefficient (95% CI)<br>(COPD cases, age and<br>sex adjusted model) | Regression Coefficient (95% CI)<br>(age, sex, height and height-<br>squared adjusted model) |
|-----------------|-------------------------------------------|-----------------------------------------------------------------|----------------------------------------------------------------------------------------|--------------------------------------------------------------------------------------|-----------------------------------------------------------------------------------------|-----------------------------------------------------------------------------------|---------------------------------------------------------------------------------------------|
| Maximum<br>FEV1 | BO                                        | -0.33(-1.00,0.33)                                               | a                                                                                      |                                                                                      |                                                                                         |                                                                                   | -0.23(-0.86,0.39)                                                                           |
|                 | CaPS                                      | 0.05(-0.23,0.33)                                                |                                                                                        |                                                                                      |                                                                                         |                                                                                   | 0.01(-0.26,0.27)                                                                            |
|                 | ELSA                                      | -0.02(-0.14,0.09)                                               |                                                                                        |                                                                                      |                                                                                         |                                                                                   | -0.02(-0.13,0.09)                                                                           |
|                 | HAS                                       | -0.14(-0.73,0.46)                                               |                                                                                        |                                                                                      |                                                                                         |                                                                                   | -0.19(-0.76,0.37)                                                                           |
|                 | HCS                                       | 0.05(-0.13,0.23)                                                |                                                                                        |                                                                                      |                                                                                         |                                                                                   | -0.01(-0.18,0.16)                                                                           |
|                 | LBC1921                                   | 0.01(-0.44,0.45)                                                |                                                                                        |                                                                                      |                                                                                         |                                                                                   | 0.13(-0.29,0.54)                                                                            |
|                 | NSHD                                      | -0.04(-0.26,0.17)                                               |                                                                                        |                                                                                      |                                                                                         |                                                                                   | -0.10(-0.29,0.10)                                                                           |
|                 | WHII                                      | -0.05(-0.20,0.09)                                               |                                                                                        |                                                                                      |                                                                                         |                                                                                   | -0.05(-0.18,0.09)                                                                           |
|                 | Combined<br>Fixed Effect                  | -0.02(-0.09,0.05)                                               | -0.05(-0.23,0.12)                                                                      | 0.02(-0.08,0.12)                                                                     | -0.05(-0.16,0.07)                                                                       | 0.09(-0.10,0.27)                                                                  | -0.03(-0.10,0.03)                                                                           |
|                 | Combined<br>Random<br>Effect              | -0.02(-0.09,0.05)                                               | -0.06(-0.23,0.12)                                                                      | 0.02(-0.08,0.12)                                                                     | -0.04(-0.16,0.07)                                                                       | 0.09(-0.08,0.27)                                                                  | -0.03(-0.10,0.03)                                                                           |
|                 | Estimated<br>variance of<br>random effect | 4.07e-14(2.19e-26,7.56e-02)                                     | 5.10e-18(0.00e+00,.)                                                                   | 7.32e-17(5.89e-<br>32,9.10e-02)                                                      | 1.41e-22(3.51e-<br>40,5.64e-05)                                                         | 5.38e-18(1.71e-<br>35,1.69e+00)                                                   | 3.81e-17(5.16e-33,2.81e-01)                                                                 |
| Maximum<br>FVC  | BO                                        | -0.17(-0.79,0.45)                                               | a                                                                                      |                                                                                      |                                                                                         |                                                                                   | -0.04(-0.59,0.52)                                                                           |
|                 | CaPS                                      | -0.16(-0.45,0.14)                                               |                                                                                        |                                                                                      |                                                                                         |                                                                                   | -0.21(-0.48,0.05)                                                                           |
|                 | ELSA                                      | -0.09(-0.20,0.02)                                               |                                                                                        |                                                                                      |                                                                                         |                                                                                   | -0.11(-0.21,0.00)                                                                           |
|                 | HAS                                       | 0.05(-0.47,0.57)                                                |                                                                                        |                                                                                      |                                                                                         |                                                                                   | -0.01(-0.49,0.48)                                                                           |
|                 | HCS                                       | 0.10(-0.06,0.26)                                                |                                                                                        |                                                                                      |                                                                                         |                                                                                   | 0.01(-0.13,0.16)                                                                            |
|                 | LBC1921                                   | -0.17(-0.61,0.27)                                               |                                                                                        |                                                                                      |                                                                                         |                                                                                   | -0.03(-0.43,0.36)                                                                           |
|                 | NSHD                                      | 0.01(-0.20,0.21)                                                |                                                                                        |                                                                                      |                                                                                         |                                                                                   | -0.05(-0.23,0.13)                                                                           |
|                 | WHII                                      | -0.09(-0.23,0.05)                                               |                                                                                        |                                                                                      |                                                                                         |                                                                                   | -0.08(-0.20,0.04)                                                                           |
|                 | Combined<br>Fixed Effect                  | -0.06(-0.12,0.01)                                               | -0.12(-0.29,0.05)                                                                      | -0.00(-0.10,0.09)                                                                    | -0.08(-0.20,0.03)                                                                       | -0.07(-0.29,0.16)                                                                 | -0.08*(-0.14,-0.02)                                                                         |
|                 | Combined<br>Random<br>Effect              | -0.05(-0.12,0.02)                                               | -0.12(-0.29,0.05)                                                                      | 0.00(-0.10,0.10)                                                                     | -0.08(-0.19,0.03)                                                                       | -0.08(-0.29,0.14)                                                                 | -0.07*(-0.13,-0.01)                                                                         |

|                                                                                                                                                                                               |                                     |                             |                             |                             |                             |                             |                             |
|-----------------------------------------------------------------------------------------------------------------------------------------------------------------------------------------------|-------------------------------------|-----------------------------|-----------------------------|-----------------------------|-----------------------------|-----------------------------|-----------------------------|
|                                                                                                                                                                                               | Estimated variance of random effect | 5.60e-08(7.09e-24,4.42e+08) | 6.12e-15(6.97e-30,5.37e+00) | 6.43e-15(7.91e-27,5.23e-03) | 1.23e-22(6.83e-39,2.23e-06) | 3.15e-23(4.54e-42,2.18e-04) | 1.93e-17(2.22e-29,1.67e-05) |
| FEV1/FVC ratio                                                                                                                                                                                | BO                                  | -0.39(-1.27,0.49)           | a                           |                             |                             |                             | -0.43(-1.31,0.45)           |
|                                                                                                                                                                                               | CaPS                                | 0.42**(0.14,0.69)           |                             |                             |                             |                             | 0.42**(0.14,0.70)           |
|                                                                                                                                                                                               | ELSA                                | 0.08(-0.07,0.24)            |                             |                             |                             |                             | 0.11(-0.05,0.26)            |
|                                                                                                                                                                                               | HAS                                 | -0.44(-1.16,0.28)           |                             |                             |                             |                             | -0.44(-1.16,0.28)           |
|                                                                                                                                                                                               | HCS                                 | -0.05(-0.28,0.19)           |                             |                             |                             |                             | 0.01(-0.23,0.24)            |
|                                                                                                                                                                                               | LBC1921                             | 0.35(-0.22,0.92)            |                             |                             |                             |                             | 0.33(-0.24,0.91)            |
|                                                                                                                                                                                               | NSHD                                | -0.11(-0.39,0.17)           |                             |                             |                             |                             | -0.08(-0.36,0.20)           |
|                                                                                                                                                                                               | WHII                                | 0.04(-0.16,0.23)            |                             |                             |                             |                             | 0.03(-0.17,0.22)            |
|                                                                                                                                                                                               | Combined Fixed Effect               | 0.05(-0.04,0.15)            | 0.10(-0.13,0.34)            | 0.05(-0.08,0.18)            | 0.04(-0.11,0.19)            | 0.26(-0.07,0.59)            | 0.07(-0.02,0.16)            |
|                                                                                                                                                                                               | Combined Random Effect              | 0.06(-0.05,0.17)            | 0.08(-0.24,0.39)            | 0.07(-0.06,0.19)            | 0.06(-0.09,0.20)            | 0.23(-0.09,0.55)            | 0.08(-0.01,0.17)            |
|                                                                                                                                                                                               | Estimated variance of random effect | 4.58e-03(1.25e-06,1.67e+01) | 5.84e-02(3.72e-03,9.16e-01) | 1.22e-18(3.66e-34,4.06e-03) | 1.82e-07(2.94e-22,1.12e+08) | 2.20e-17(5.96e-34,8.15e-01) | 1.01e-11(1.73e-26,5.88e+03) |
| Outcomes z-scored within cohorts<br>*p<0.05, **p<0.01, ***p<0.001, ****p<0.0001<br>a Cohort specific estimates are suppressed for smoking and COPD strata due to the small number of carriers |                                     |                             |                             |                             |                             |                             |                             |

**S23 Table. Association of deltaF508 carrier status with lung function, outcomes transformed**

| Outcome                             | Cohort                      | Regression Coefficient (95% CI) (age and sex adjusted model) | Regression Coefficient (95% CI) (current smokers, age and sex adjusted model) | Regression Coefficient (95% CI) (ex smokers, age and sex adjusted model) | Regression Coefficient (95% CI) (never smokers, age and sex adjusted model) | Regression Coefficient (95% CI) (COPD cases, age and sex adjusted model) | Regression Coefficient (95% CI) (age, sex, height and height-squared adjusted model) |  |                   |
|-------------------------------------|-----------------------------|--------------------------------------------------------------|-------------------------------------------------------------------------------|--------------------------------------------------------------------------|-----------------------------------------------------------------------------|--------------------------------------------------------------------------|--------------------------------------------------------------------------------------|--|-------------------|
| Sqrt(Maximum FVC)                   | BO                          | -0.16(-0.78,0.46)                                            | a                                                                             |                                                                          |                                                                             |                                                                          |                                                                                      |  | -0.03(-0.60,0.53) |
|                                     | CaPS                        | -0.14(-0.43,0.14)                                            |                                                                               |                                                                          |                                                                             |                                                                          |                                                                                      |  | -0.20(-0.46,0.06) |
|                                     | ELSA                        | -0.08(-0.19,0.03)                                            |                                                                               |                                                                          |                                                                             |                                                                          |                                                                                      |  | -0.10(-0.20,0.01) |
|                                     | HAS                         | 0.07(-0.44,0.58)                                             |                                                                               |                                                                          |                                                                             |                                                                          |                                                                                      |  | 0.01(-0.47,0.49)  |
|                                     | HCS                         | 0.09(-0.07,0.25)                                             |                                                                               |                                                                          |                                                                             |                                                                          |                                                                                      |  | 0.00(-0.14,0.15)  |
|                                     | LBC1921                     | -0.17(-0.61,0.28)                                            |                                                                               |                                                                          |                                                                             |                                                                          |                                                                                      |  | -0.04(-0.44,0.36) |
|                                     | NSHD                        | 0.01(-0.20,0.22)                                             |                                                                               |                                                                          |                                                                             |                                                                          |                                                                                      |  | -0.05(-0.24,0.13) |
|                                     | WHII                        | -0.09(-0.23,0.05)                                            |                                                                               |                                                                          |                                                                             |                                                                          |                                                                                      |  | -0.08(-0.20,0.04) |
|                                     | Combined Fixed Effect       | -0.05(-0.12,0.02)                                            |                                                                               |                                                                          |                                                                             |                                                                          |                                                                                      |  | -0.11(-0.28,0.06) |
| Combined Random Effect              | -0.05(-0.11,0.02)           | -0.11(-0.28,0.05)                                            | 0.01(-0.09,0.10)                                                              | -0.09(-0.20,0.02)                                                        | -0.08(-0.31,0.14)                                                           | -0.07*(-0.13,-0.01)                                                      |                                                                                      |  |                   |
| Estimated variance of random effect | 8.13e-14(6.22e-28,1.06e+01) | 1.44e-10(0.00e+00,.)                                         | 1.21e-13(1.17e-26,1.25e+00)                                                   | 1.35e-20(6.45e-35,2.83e-06)                                              | 2.71e-22(6.22e-37,1.18e-07)                                                 | 1.63e-22(2.46e-36,1.08e-08)                                              |                                                                                      |  |                   |
| (FEV1/FVC ratio) <sup>3</sup>       | BO                          | -0.16(-1.05,0.73)                                            | a                                                                             |                                                                          |                                                                             |                                                                          |                                                                                      |  | -0.21(-1.10,0.69) |
|                                     | CaPS                        | 0.47**(0.19,0.76)                                            |                                                                               |                                                                          |                                                                             |                                                                          |                                                                                      |  | 0.48**(0.19,0.77) |
|                                     | ELSA                        | 0.09(-0.06,0.24)                                             |                                                                               |                                                                          |                                                                             |                                                                          |                                                                                      |  | 0.12(-0.04,0.27)  |
|                                     | HAS                         | -0.47(-1.17,0.23)                                            |                                                                               |                                                                          |                                                                             |                                                                          |                                                                                      |  | -0.48(-1.17,0.22) |
|                                     | HCS                         | -0.02(-0.25,0.22)                                            |                                                                               |                                                                          |                                                                             |                                                                          |                                                                                      |  | 0.04(-0.19,0.27)  |
|                                     | LBC1921                     | 0.38(-0.20,0.95)                                             |                                                                               |                                                                          |                                                                             |                                                                          |                                                                                      |  | 0.36(-0.22,0.93)  |
|                                     | NSHD                        | -0.06(-0.34,0.22)                                            |                                                                               |                                                                          |                                                                             |                                                                          |                                                                                      |  | -0.03(-0.31,0.25) |
|                                     | WHII                        | 0.01(-0.19,0.20)                                             |                                                                               |                                                                          |                                                                             |                                                                          |                                                                                      |  | 0.00(-0.20,0.20)  |

|  |                                     |                             |                             |                             |                             |                       |                             |
|--|-------------------------------------|-----------------------------|-----------------------------|-----------------------------|-----------------------------|-----------------------|-----------------------------|
|  | Combined Fixed Effect               | 0.07(-0.03,0.16)            | 0.15(-0.07,0.38)            | 0.06(-0.07,0.19)            | 0.04(-0.12,0.19)            | 0.13(-0.03,0.29)      | 0.09(-0.01,0.18)            |
|  | Combined Random Effect              | 0.07(-0.04,0.19)            | 0.09(-0.24,0.41)            | 0.07(-0.06,0.20)            | 0.06(-0.13,0.25)            | 0.12(-0.03,0.27)      | 0.09(-0.02,0.20)            |
|  | Estimated variance of random effect | 7.20e-03(2.64e-05,1.96e+00) | 7.61e-02(7.02e-03,8.24e-01) | 7.30e-11(7.66e-27,6.95e+05) | 1.47e-02(2.22e-04,9.76e-01) | 6.50e-22 <sup>b</sup> | 3.68e-03(2.25e-07,6.04e+01) |

Outcomes z-scored within cohorts

\*p<0.05, \*\*p<0.01, \*\*\*p<0.001, \*\*\*\*p<0.0001

<sup>a</sup> Cohort specific estimates are suppressed for smoking and COPD strata due to the small number of carriers

<sup>b</sup> Standard error of the variance of the random effect not estimable

**S24 Table. Number of COPD cases and non-cases in deltaF508 carrier – COPD analysis**

| Cohort                                                                                                    | Number COPD cases | Number COPD non-cases | Total |
|-----------------------------------------------------------------------------------------------------------|-------------------|-----------------------|-------|
| BO                                                                                                        | 35                | 228                   | 263   |
| CaPS                                                                                                      | 87                | 1189                  | 1276  |
| ELSA                                                                                                      | 504               | 4461                  | 4965  |
| HAS                                                                                                       | 22                | 168                   | 190   |
| HCS                                                                                                       | 240               | 2323                  | 2563  |
| LBC1921                                                                                                   | 30                | 488                   | 518   |
| NSHD                                                                                                      | 89                | 1867                  | 1956  |
| WHII                                                                                                      | 246               | 3162                  | 3408  |
| Total                                                                                                     | 1253              | 13886                 | 15139 |
| Total (%)                                                                                                 | 8.28              | 91.72                 | 100   |
| Numbers based on individuals with a valid deltaF508 genotype, age, sex, height and lung function measures |                   |                       |       |

**S40 Table. Association of deltaF508 carrier status with COPD status, adjusted for age and sex**

| Cohort                                                                          | OR for COPD <sup>a</sup> (95% CI) |
|---------------------------------------------------------------------------------|-----------------------------------|
| BO                                                                              | 1.55(0.17,14.53)                  |
| CaPS                                                                            | -                                 |
| ELSA                                                                            | 1.01(0.61,1.69)                   |
| HAS                                                                             | 2.66(0.50,14.12)                  |
| HCS                                                                             | 1.13(0.51,2.50)                   |
| LBC1921                                                                         | 1.52(0.19,12.26)                  |
| NSHD                                                                            | 2.05(0.72,5.89)                   |
| WHII                                                                            | 1.39(0.69,2.82)                   |
| Combined Fixed Effect                                                           | 1.14(0.82,1.58)                   |
| Combined Random Effect                                                          | 1.14(0.82,1.58)                   |
| Estimated variance of random effect                                             | 5.50e-17(0.00e+00,.)              |
| *p<0.05, **p<0.01, ***p<0.001, ****p<0.0001                                     |                                   |
| <sup>a</sup> Coefficient is odds ratio for COPD in carriers versus non-carriers |                                   |



## Medium-chain acyl Co-A dehydrogenase deficiency

**S41 Table. MCADD (K304E) carrier frequency**

| Cohort   | Number of carriers <sup>a</sup> | Number of non-carriers <sup>a</sup> | Total, N <sup>a</sup> | Minor Allele Frequency | % female | Mean age <sup>b</sup> (SE) |
|----------|---------------------------------|-------------------------------------|-----------------------|------------------------|----------|----------------------------|
| BO       | 2                               | 263                                 | 265                   | 0.004                  | 55.09    | 69.62(0.26)                |
| CaPS     | 13                              | 1237                                | 1250                  | 0.005                  | 0        | 73.14(0.15)                |
| ELSA     | 90                              | 5393                                | 5483                  | 0.008                  | 54.37    | 66.10(0.13)                |
| HAS      | 8                               | 511                                 | 519                   | 0.008                  | 38.92    | 76.39(0.16)                |
| HCS      | 43                              | 2729                                | 2772                  | 0.008                  | 47.19    | 68.25(0.07)                |
| LBC1921  | 0                               | 522                                 | 522                   | 0.000                  | 58.24    | 79.07(0.03)                |
| NSHD     | 33                              | 2649                                | 2682                  | 0.006                  | 50.15    | 53.45(0.00)                |
| WHII     | 89                              | 4379                                | 4468                  | 0.010                  | 24.17    | 60.90(0.09)                |
| Combined | 278                             | 17683                               | 17961                 | 0.008                  | 41.01    | 64.83(0.09)                |

<sup>a</sup> Total number of individuals for each mutation is total number with a valid genotype, sex, age and at least one outcome measure  
<sup>b</sup> Mean age at walk test for LBC1921 and WHII, and at balance test for all other cohorts

**S25 Table. Association of K304E carrier status with physical capability, adjusted for age and sex**

| Outcome          | Cohort                              | Coefficient <sup>a</sup> (95% CI)   |
|------------------|-------------------------------------|-------------------------------------|
| Grip strength    | ELSA                                | c                                   |
|                  | HAS                                 |                                     |
|                  | HCS                                 |                                     |
|                  | LBC1921                             |                                     |
|                  | NSHD                                |                                     |
|                  | Combined Fixed Effect               | -0.05(-0.15,0.04)                   |
|                  | Combined Random Effect              | -0.05(-0.15,0.04)                   |
|                  | Estimated variance of random effect | 4.60e-18 <sup>b</sup>               |
| Chair rise speed | ELSA                                | c                                   |
|                  | HAS                                 |                                     |
|                  | HCS                                 |                                     |
|                  | NSHD                                |                                     |
|                  | Combined Fixed Effect               |                                     |
|                  | Combined Random Effect              | 0.10(-0.06,0.26)                    |
|                  |                                     | Estimated variance of random effect |
| Walk speed       | ELSA                                | c                                   |
|                  | HAS                                 |                                     |
|                  | HCS                                 |                                     |
|                  | LBC1921                             |                                     |
|                  | WHII                                |                                     |
|                  | Combined Fixed Effect               | 0.12(-0.02,0.26)                    |
|                  | Combined Random Effect              | 0.12(-0.02,0.26)                    |
|                  | Estimated variance of random effect | 5.01e-17(0.00e+00,.)                |

|                                                                                                                                                                                                                                                                                                                                                                                                                                                                |                                     |                       |
|----------------------------------------------------------------------------------------------------------------------------------------------------------------------------------------------------------------------------------------------------------------------------------------------------------------------------------------------------------------------------------------------------------------------------------------------------------------|-------------------------------------|-----------------------|
| TUG speed                                                                                                                                                                                                                                                                                                                                                                                                                                                      | BO                                  | c                     |
|                                                                                                                                                                                                                                                                                                                                                                                                                                                                | CaPS                                |                       |
|                                                                                                                                                                                                                                                                                                                                                                                                                                                                | HAS                                 |                       |
|                                                                                                                                                                                                                                                                                                                                                                                                                                                                | HCS                                 |                       |
|                                                                                                                                                                                                                                                                                                                                                                                                                                                                | NSHD                                |                       |
|                                                                                                                                                                                                                                                                                                                                                                                                                                                                | Combined Fixed Effect               |                       |
|                                                                                                                                                                                                                                                                                                                                                                                                                                                                | Combined Random Effect              | 0.11(-0.13,0.34)      |
|                                                                                                                                                                                                                                                                                                                                                                                                                                                                | Estimated variance of random effect | 7.56e-20 <sup>b</sup> |
| Inability to balance for 5s                                                                                                                                                                                                                                                                                                                                                                                                                                    | BO                                  | c                     |
|                                                                                                                                                                                                                                                                                                                                                                                                                                                                | CaPS                                |                       |
|                                                                                                                                                                                                                                                                                                                                                                                                                                                                | ELSA                                |                       |
|                                                                                                                                                                                                                                                                                                                                                                                                                                                                | HAS                                 |                       |
|                                                                                                                                                                                                                                                                                                                                                                                                                                                                | HCS                                 |                       |
|                                                                                                                                                                                                                                                                                                                                                                                                                                                                | NSHD                                |                       |
|                                                                                                                                                                                                                                                                                                                                                                                                                                                                | Combined Fixed Effect               | 0.92(0.55,1.56)       |
|                                                                                                                                                                                                                                                                                                                                                                                                                                                                | Combined Random Effect              | 0.92(0.55,1.56)       |
|                                                                                                                                                                                                                                                                                                                                                                                                                                                                | Estimated variance of random effect | 2.85e-10(0.00e+00,.)  |
| <p>Continuous outcomes z-scored within cohorts<br/> <p>*p&lt;0.05, **p&lt;0.01, ***p&lt;0.001, ****p&lt;0.0001<br/> <p><sup>a</sup> Coefficients are linear regression coefficients for continuous outcomes and odds ratios for binary outcomes<br/> <p><sup>b</sup> Standard error of the variance of the random effect not estimable<br/> <p><sup>c</sup> Cohort specific estimates are suppressed due to the small number of carriers</p> </p> </p></p></p> |                                     |                       |

**S26 Table. Association of K304E carrier status with cognitive capability, adjusted for age and sex**

| Outcome              |                                     | Cohort                              | Regression Coefficient (95% CI)     |                             |
|----------------------|-------------------------------------|-------------------------------------|-------------------------------------|-----------------------------|
| Crystallized ability | Mill Hill                           | HAS                                 | 0.27(-0.44,0.98)                    |                             |
|                      |                                     | WHII                                | -0.39***(-0.62,-0.17)               |                             |
|                      | Mill Hill <sup>b</sup>              | WHII                                | -0.35**(-0.57,-0.12)                |                             |
|                      | NART                                | CaPS                                | 0.03(-0.52,0.57)                    |                             |
|                      |                                     | LBC1921                             | NC                                  |                             |
|                      |                                     | NSHD                                | 0.15(-0.22,0.51)                    |                             |
|                      |                                     | Combined Fixed Effect               | F3CH                                |                             |
|                      | Combined Random Effect              | F3CH                                |                                     |                             |
|                      | Estimated variance of random effect | F3CH                                |                                     |                             |
| Fluid ability        | AH4                                 | CaPS                                | 0.16(-0.38,0.70)                    |                             |
|                      |                                     | HAS                                 | -0.16(-0.85,0.54)                   |                             |
|                      |                                     | WHII                                | -0.18(-0.40,0.04)                   |                             |
|                      |                                     | Combined Fixed Effect               | -0.13(-0.33,0.06)                   |                             |
|                      |                                     | Combined Random Effect              | -0.14(-0.33,0.06)                   |                             |
|                      |                                     | Estimated variance of random effect | 7.24e-14(0.00e+00,.)                |                             |
|                      | Semantic fluency                    | CaPS                                |                                     | -0.30(-0.83,0.24)           |
|                      |                                     |                                     | ELSA                                | 0.10(-0.10,0.29)            |
|                      |                                     | NSHD                                |                                     | -0.21(-0.56,0.13)           |
|                      |                                     |                                     | WHII                                | -0.10(-0.33,0.12)           |
|                      |                                     |                                     | Combined Fixed Effect               | -0.05(-0.18,0.09)           |
|                      |                                     |                                     | Combined Random Effect              | -0.05(-0.19,0.09)           |
|                      |                                     |                                     | Estimated variance of random effect | 1.66e-03(7.13e-10,3.85e+03) |

|                                                                                                                                                                                                                                                                                                                                                                                         |                             |                                     |                             |
|-----------------------------------------------------------------------------------------------------------------------------------------------------------------------------------------------------------------------------------------------------------------------------------------------------------------------------------------------------------------------------------------|-----------------------------|-------------------------------------|-----------------------------|
|                                                                                                                                                                                                                                                                                                                                                                                         | Phonemic Fluency            | LBC1921                             | NC                          |
|                                                                                                                                                                                                                                                                                                                                                                                         |                             | WHII                                | -0.19(-0.42,0.04)           |
|                                                                                                                                                                                                                                                                                                                                                                                         | Search Speed <sup>c</sup>   | ELSA                                | 0.01(-0.19,0.21)            |
|                                                                                                                                                                                                                                                                                                                                                                                         |                             | NSHD                                | 0.15(-0.19,0.49)            |
|                                                                                                                                                                                                                                                                                                                                                                                         | Word recall                 | ELSA                                | 0.03(-0.15,0.22)            |
|                                                                                                                                                                                                                                                                                                                                                                                         |                             | NSHD                                | 0.07(-0.28,0.42)            |
|                                                                                                                                                                                                                                                                                                                                                                                         |                             | WHII                                | -0.06(-0.29,0.16)           |
|                                                                                                                                                                                                                                                                                                                                                                                         |                             | Combined Fixed Effect               | 0.00(-0.13,0.14)            |
|                                                                                                                                                                                                                                                                                                                                                                                         |                             | Combined Random Effect              | 0.01(-0.13,0.14)            |
|                                                                                                                                                                                                                                                                                                                                                                                         |                             | Estimated variance of random effect | 2.12e-20(1.12e-40,4.03e+00) |
|                                                                                                                                                                                                                                                                                                                                                                                         | FCRT <sup>a</sup>           | CaPS                                | 0.03(-0.52,0.58)            |
|                                                                                                                                                                                                                                                                                                                                                                                         | Ravens Progressive Matrices | LBC1921                             | NC                          |
|                                                                                                                                                                                                                                                                                                                                                                                         | Logical Memory              | LBC1921                             | NC                          |
| <p>Outcomes z-scored within cohorts<br/> F3CH: Fewer than 3 cohorts with adequate data to perform the meta-analysis<br/> NC: No carriers<br/> *p&lt;0.05, **p&lt;0.01, ***p&lt;0.001, ****p&lt;0.0001<br/> <sup>a</sup> inverse transformed prior to z-scoring<br/> <sup>b</sup> square transformed prior to z-scoring<br/> <sup>c</sup> natural log transformed prior to z-scoring</p> |                             |                                     |                             |

## Phenylketonuria

**S27 Table. PKU mutation carrier status**

| Cohort   | Number of carriers <sup>a,c</sup> | Number of non-carriers <sup>a</sup> | Total, N <sup>a</sup> | Minor Allele Frequency | % female | Mean age <sup>b</sup> (SE) |
|----------|-----------------------------------|-------------------------------------|-----------------------|------------------------|----------|----------------------------|
| BO       | 1                                 | 263                                 | 264                   | 0.002                  | 54.92    | 69.64(0.26)                |
| CaPS     | 7                                 | 1236                                | 1243                  | 0.003                  | 0        | 73.11(0.15)                |
| ELSA     | 30                                | 5367                                | 5397                  | 0.003                  | 54.2     | 66.06(0.13)                |
| HAS      | 5                                 | 495                                 | 500                   | 0.005                  | 39.2     | 76.39(0.16)                |
| HCS      | 13                                | 2732                                | 2745                  | 0.002                  | 47.25    | 68.26(0.07)                |
| LBC1921  | 4                                 | 522                                 | 526                   | 0.004                  | 57.98    | 79.06(0.02)                |
| NSHD     | 18                                | 2622                                | 2640                  | 0.003                  | 49.92    | 53.45(0.00)                |
| WHII     | 33                                | 4394                                | 4427                  | 0.004                  | 24.01    | 60.88(0.09)                |
| Combined | 111                               | 17631                               | 17742                 | 0.003                  | 40.86    | 64.83(0.09)                |

<sup>a</sup> Total number of individuals is total number with a valid carrier status, sex, age and at least one outcome measure

<sup>b</sup> Mean age at walk test for LBC1921 and WHII, and at balance test for all other cohorts

<sup>c</sup> A carrier is defined as any individual who carries at least one minor allele of any of these three SNPs. A non-carrier is homozygous for the major allele at each of these three SNPs. If an individual had a missing genotype for one of the PKU SNPs, they were included in the analyses if they were a carrier but were excluded if they were a non-carrier based on the remaining PKU SNPs

**S28 Table. Association of PKU mutation carrier status with physical capability, adjusted for age and sex**

| Outcome          | Cohort                              | Coefficient <sup>b</sup> (95% CI) |                        |
|------------------|-------------------------------------|-----------------------------------|------------------------|
| Grip strength    | ELSA                                | a                                 |                        |
|                  | HAS                                 |                                   |                        |
|                  | HCS                                 |                                   |                        |
|                  | LBC1921                             |                                   |                        |
|                  | NSHD                                |                                   |                        |
|                  | Combined Fixed Effect               |                                   | -0.14(-0.29,0.01)      |
|                  | Combined Random Effect              | -0.14(-0.29,0.01)                 |                        |
|                  | Estimated variance of random effect | 1.80e-17(1.41e-68,2.30e+34)       |                        |
| Chair rise speed | ELSA                                | a                                 |                        |
|                  | HAS                                 |                                   |                        |
|                  | HCS                                 |                                   |                        |
|                  | NSHD                                |                                   |                        |
|                  | Combined Fixed Effect               |                                   | -0.23(-0.49,0.02)      |
|                  |                                     |                                   | Combined Random Effect |
|                  | Estimated variance of random effect | 6.88e-02(4.01e-04,1.18e+01)       |                        |
| Walk Speed       | ELSA                                | a                                 |                        |
|                  | HAS                                 |                                   |                        |
|                  | HCS                                 |                                   |                        |
|                  | LBC1921                             |                                   |                        |
|                  | WHII                                |                                   |                        |
|                  | Combined Fixed Effect               |                                   | -0.07(-0.29,0.16)      |
|                  | Combined Random Effect              | -0.07(-0.29,0.16)                 |                        |
|                  | Estimated variance of random effect | 1.01e-12(6.68e-28,1.54e+03)       |                        |

|                                                                                                                                                                                                                                                                                                                     |                                     |                             |
|---------------------------------------------------------------------------------------------------------------------------------------------------------------------------------------------------------------------------------------------------------------------------------------------------------------------|-------------------------------------|-----------------------------|
| TUG Speed                                                                                                                                                                                                                                                                                                           | BO                                  | a                           |
|                                                                                                                                                                                                                                                                                                                     | CaPS                                |                             |
|                                                                                                                                                                                                                                                                                                                     | HAS                                 |                             |
|                                                                                                                                                                                                                                                                                                                     | HCS                                 |                             |
|                                                                                                                                                                                                                                                                                                                     | NSHD                                |                             |
|                                                                                                                                                                                                                                                                                                                     | Combined Fixed Effect               |                             |
|                                                                                                                                                                                                                                                                                                                     | Combined Random Effect              | 0.03(-0.39,0.45)            |
|                                                                                                                                                                                                                                                                                                                     | Estimated variance of random effect | 5.13e-02(5.35e-05,4.92e+01) |
| Inability to balance for 5s                                                                                                                                                                                                                                                                                         | BO                                  | a                           |
|                                                                                                                                                                                                                                                                                                                     | CaPS                                |                             |
|                                                                                                                                                                                                                                                                                                                     | ELSA                                |                             |
|                                                                                                                                                                                                                                                                                                                     | HAS                                 |                             |
|                                                                                                                                                                                                                                                                                                                     | HCS                                 |                             |
|                                                                                                                                                                                                                                                                                                                     | NSHD                                |                             |
|                                                                                                                                                                                                                                                                                                                     | Combined Fixed Effect               | 0.76(0.31,1.87)             |
|                                                                                                                                                                                                                                                                                                                     | Combined Random Effect              | 0.76(0.31,1.87)             |
|                                                                                                                                                                                                                                                                                                                     | Estimated variance of random effect | 1.32e-14(0.00e+00,.)        |
| Continuous outcomes z-scored within cohorts<br>*p<0.05, **p<0.01, ***p<0.001, ****p<0.0001<br><sup>a</sup> Cohort specific estimates are suppressed due to the small number of carriers<br><sup>b</sup> Coefficients are linear regression coefficients for continuous outcomes and odds ratios for binary outcomes |                                     |                             |



**S29 Table. Association of PKU mutation carrier status with cognitive capability, adjusted for age and sex**

| Outcome                             |                        | Cohort                              | Regression Coefficient (95% CI) |
|-------------------------------------|------------------------|-------------------------------------|---------------------------------|
| Crystallized ability                | Mill Hill              | HAS                                 | -0.17(-1.06,0.72)               |
|                                     |                        | WHII                                | 0.02(-0.35,0.40)                |
|                                     | Mill Hill <sup>b</sup> | WHII                                | 0.01(-0.36,0.39)                |
|                                     | NART                   | CaPS                                | 0.36(-0.38,1.10)                |
|                                     |                        | LBC1921                             | 0.29(-0.69,1.27)                |
|                                     |                        | NSHD                                | 0.09(-0.38,0.56)                |
|                                     |                        | Combined Fixed Effect               | 0.18(-0.18,0.55)                |
|                                     |                        | Combined Random Effect              | 0.18(-0.18,0.55)                |
|                                     |                        | Estimated variance of random effect | 3.50e-18(0.00e+00,..)           |
|                                     | Fluid ability          | AH4                                 | CaPS                            |
| HAS                                 |                        |                                     | 0.09(-0.79,0.97)                |
| WHII                                |                        |                                     | -0.12(-0.48,0.25)               |
| Combined Fixed Effect               |                        |                                     | -0.01(-0.32,0.30)               |
| Combined Random Effect              |                        |                                     | -0.02(-0.32,0.29)               |
| Estimated variance of random effect |                        |                                     | 3.83e-15(2.95e-38,4.97e+08)     |
| Semantic fluency                    |                        | CaPS                                | 0.10(-0.63,0.82)                |
|                                     |                        | ELSA                                | -0.45**(-0.79,-0.11)            |
|                                     |                        | NSHD                                | 0.15(-0.31,0.61)                |
|                                     |                        | WHII                                | -0.12(-0.49,0.25)               |
|                                     |                        | Combined Fixed Effect               | -0.17(-0.38,0.05)               |

|                                                                                                                                                                                                                                                                                    |                             |                                     |                             |
|------------------------------------------------------------------------------------------------------------------------------------------------------------------------------------------------------------------------------------------------------------------------------------|-----------------------------|-------------------------------------|-----------------------------|
|                                                                                                                                                                                                                                                                                    |                             | Combined Random Effect              | -0.15(-0.41,0.10)           |
|                                                                                                                                                                                                                                                                                    |                             | Estimated variance of random effect | 1.74e-02(1.35e-04,2.25e+00) |
|                                                                                                                                                                                                                                                                                    | Phonemic fluency            | LBC1921                             | -0.34(-1.34,0.65)           |
|                                                                                                                                                                                                                                                                                    |                             | WHII                                | -0.08(-0.47,0.30)           |
|                                                                                                                                                                                                                                                                                    | Search Speed <sup>c</sup>   | ELSA                                | -0.02(-0.36,0.33)           |
|                                                                                                                                                                                                                                                                                    |                             | NSHD                                | -0.20(-0.66,0.26)           |
|                                                                                                                                                                                                                                                                                    | Word recall                 | ELSA                                | 0.04(-0.28,0.36)            |
|                                                                                                                                                                                                                                                                                    |                             | NSHD                                | 0.09(-0.37,0.55)            |
|                                                                                                                                                                                                                                                                                    |                             | WHII                                | -0.07(-0.44,0.30)           |
|                                                                                                                                                                                                                                                                                    |                             | Combined Fixed Effect               | 0.01(-0.20,0.23)            |
|                                                                                                                                                                                                                                                                                    |                             | Combined Random Effect              | 0.01(-0.20,0.23)            |
|                                                                                                                                                                                                                                                                                    |                             | Estimated variance of random effect | 2.03e-19(7.80e-44,5.28e+05) |
|                                                                                                                                                                                                                                                                                    | FCRT <sup>a</sup>           | CaPS                                | 0.25(-0.53,1.03)            |
|                                                                                                                                                                                                                                                                                    | Ravens Progressive Matrices | LBC1921                             | 0.52(-0.46,1.50)            |
|                                                                                                                                                                                                                                                                                    | Logical Memory              | LBC1921                             | -0.33(-1.32,0.66)           |
| <p>Outcomes z-scored within cohorts<br/> *p&lt;0.05, **p&lt;0.01, ***p&lt;0.001, ****p&lt;0.0001<br/> <sup>a</sup> inverse transformed prior to z-scoring<br/> <sup>b</sup> square transformed prior to z-scoring<br/> <sup>c</sup> natural log transformed prior to z-scoring</p> |                             |                                     |                             |

**S30 Table. Tests for equality of variances**

| Outcome   | Groups tested                    | p-value       |                                  |                                        |
|-----------|----------------------------------|---------------|----------------------------------|----------------------------------------|
|           |                                  | Levene's test | Brown & Forsythe's test (median) | Brown & Forsythe's test (trimmed mean) |
| FVC       | deltaF508 carrier vs non-carrier | 0.5           | 0.49                             | 0.49                                   |
| FVC       | All PI classes                   | 0.06          | 0.05                             | 0.07                                   |
|           | PI-MS vs PI-MM                   | 0.57          | 0.55                             | 0.55                                   |
|           | PI-MZ vs PI-MM                   | <0.005        | <0.005                           | <0.005                                 |
|           | PI-SS vs PI-MM                   | 0.89          | 0.88                             | 0.9                                    |
|           | PI-SZ vs PI-MM                   | 0.83          | 0.82                             | 0.82                                   |
|           | PI-ZZ vs PI-MM                   | 0.5           | 0.32                             | 0.5                                    |
| SQRT(FVC) | All PI classes                   | 0.26          | 0.22                             | 0.27                                   |
|           | PI-MS vs PI-MM                   | 0.44          | 0.45                             | 0.45                                   |
|           | PI-MZ vs PI-MM                   | 0.02          | 0.02                             | 0.02                                   |
|           | PI-SS vs PI-MM                   | 0.99          | 1                                | 0.98                                   |
|           | PI-SZ vs PI-MM                   | 0.84          | 0.85                             | 0.83                                   |
|           | PI-ZZ vs PI-MM                   | 0.68          | 0.41                             | 0.68                                   |
| FEV1      | All PI classes                   | 0.31          | 0.28                             | 0.3                                    |
|           | PI-MS vs PI-MM                   | 0.44          | 0.45                             | 0.44                                   |
|           | PI-MZ vs PI-MM                   | 0.03          | 0.03                             | 0.03                                   |
|           | PI-SS vs PI-MM                   | 0.55          | 0.5                              | 0.55                                   |
|           | PI-SZ vs PI-MM                   | 0.52          | 0.37                             | 0.47                                   |
|           | PI-ZZ vs PI-MM                   | 0.7           | 0.93                             | 0.7                                    |
| Height    | All PI classes                   | 0.48          | 0.52                             | 0.46                                   |
|           | PI-MS vs PI-MM                   | 0.27          | 0.28                             | 0.27                                   |

|                                                                                                                                                                                                                           |                |      |      |      |
|---------------------------------------------------------------------------------------------------------------------------------------------------------------------------------------------------------------------------|----------------|------|------|------|
|                                                                                                                                                                                                                           | PI-MZ vs PI-MM | 0.78 | 0.78 | 0.79 |
|                                                                                                                                                                                                                           | PI-SS vs PI-MM | 0.42 | 0.51 | 0.38 |
|                                                                                                                                                                                                                           | PI-SZ vs PI-MM | 0.65 | 0.65 | 0.65 |
|                                                                                                                                                                                                                           | PI-ZZ vs PI-MM | 0.12 | 0.13 | 0.12 |
| Lung function measures were included as z-scores, height was included in cm. Tests performed using Stata's(18) <code>–robvar-</code> command , pooling cohorts and restricting to individuals with sex and age variables. |                |      |      |      |

**S31 Table. Detecting influential data points in associations of interest**

| Association of interest (fixed effects analysis)                                                                                      | Minimum<br>dfbeta<br>statistic | Maximum<br>dfbeta<br>statistic | Regression Coefficient<br>(95% CI) of carrier<br>effect with most<br>extreme 60 values<br>removed |
|---------------------------------------------------------------------------------------------------------------------------------------|--------------------------------|--------------------------------|---------------------------------------------------------------------------------------------------|
| Association of PI-MZ vs PI-MM with FEV1, age and sex adjusted                                                                         | -0.16                          | 0.11                           | 0.16****(0.09,0.22)                                                                               |
| Association of PI-MZ vs PI-MM with FVC, age and sex adjusted                                                                          | -0.15                          | 0.14                           | 0.16****(0.10,0.22)                                                                               |
| Association of PI-MZ vs PI-MM with FEV1, age, sex, height and height-squared adjusted                                                 | -0.18                          | 0.12                           | 0.09**(0.04,0.15)                                                                                 |
| Association of PI-MZ vs PI-MM with FVC, age, sex, height and height-squared adjusted                                                  | -0.15                          | 0.19                           | 0.08**(0.02,0.13)                                                                                 |
| Association of PI-MZ vs PI-MM with height, age and sex adjusted                                                                       | -0.13                          | 0.1                            | 1.55****(1.06,2.03)                                                                               |
| Association of PI-MZ vs PI-MM with height, age, sex, FEV1 and FVC adjusted                                                            | -0.13                          | 0.15                           | 0.92***(0.45,1.38)                                                                                |
| Association of PI-MZ vs PI-MM with ln(weight), age and sex adjusted                                                                   | -0.11                          | 0.17                           | 0.01(-0.00,0.02)                                                                                  |
| Association of deltaF508 carrier status with FVC, age, sex, height and height-squared adjusted                                        | -0.22                          | 0.18                           | -0.07*(-0.14,-0.01)                                                                               |
| Association of PI-MZ vs PI-MM with grip strength, age and sex adjusted                                                                | -0.15                          | 0.25                           | 0.06*(0.00,0.12)                                                                                  |
| Lung function and grip strength included as z-scores.<br>Height in cm and weight in kg<br>*p<0.05, **p<0.01, ***p<0.001, ****p<0.0001 |                                |                                |                                                                                                   |

## Supplemental References

1. Belsley DA, Kuh E, Welsch RE. Regression Diagnostics: Identifying Influential Data and Sources of Collinearity. New York: Wiley; 1980.
2. Martin RM, Gunnell D, Pemberton J, Frankel S, Davey Smith G. Cohort Profile: The Boyd Orr cohort—an historical cohort study based on the 65 year follow-up of the Carnegie Survey of Diet and Health (1937–39). *International Journal of Epidemiology*. 2005;34(4):742-9.
3. Steptoe A, Breeze E, Banks J, Nazroo J. Cohort Profile: The English Longitudinal Study of Ageing. *International Journal of Epidemiology*. 2013;42(6):1640-8.
4. Syddall HE, Simmonds SJ, Martin HJ, Watson C, Dennison EM, Cooper C, et al. Cohort profile: The Hertfordshire Ageing Study (HAS). *International Journal of Epidemiology*. 2010;39(1):36-43.
5. Syddall H, Aihie Sayer A, Dennison E, Martin H, Barker D, Cooper C, et al. Cohort Profile: The Hertfordshire Cohort Study. *International Journal of Epidemiology*. 2005;34(6):1234-42.
6. Deary IJ, Gow AJ, Pattie A, Starr JM. Cohort Profile: The Lothian Birth Cohorts of 1921 and 1936. *International Journal of Epidemiology*. 2012;41(6):1576-84.
7. Kuh D, Pierce M, Adams J, Deanfield J, Ekelund U, Friberg P, et al. Cohort Profile: Updating the cohort profile for the MRC National Survey of Health and Development: a new clinic-based data collection for ageing research. *International Journal of Epidemiology*. 2011;40(1):e1-e9.
8. Marmot M, Brunner E. Cohort Profile: The Whitehall II study. *International Journal of Epidemiology*. 2005;34(2):251-6.
9. Cooper R, Hardy R, Aihie Sayer A, Ben-Shlomo Y, Birnie K, Cooper C, et al. Age and Gender Differences in Physical Capability Levels from Mid-Life Onwards: The Harmonisation and Meta-Analysis of Data from Eight UK Cohort Studies. *PLoS ONE*. 2011;6(11):e27899.
10. Nelson HE, Willison JR. National Adult Reading Test (NART) test manual (Part II). Windsor, England: NFER-NELSON; 1991.
11. Raven JC. Guide to using the Mill Hill vocabulary test with progressive matrices. London, England: HK Lewis; 1965.
12. Heim AW. AH4 Group Test of General Intelligence. Windsor: The NFER-Nelson Publishing Company; 1970.
13. Wechsler D. Wechsler Memory Scale-Revised. New York, NY: Psychological Corp; 1987.
14. Raven JC, Court JH, Raven J. Manual for Raven's Progressive Matrices and Vocabulary Scales. London, England: H. K. Lewis; 1977.
15. Bolton CE, Cockcroft JR, Sabit R, Munnery M, McEniery CM, Wilkinson IB, et al. Lung function in mid-life compared with later life is a stronger predictor of arterial stiffness in men: The Caerphilly Prospective Study. *International Journal of Epidemiology*. 2009;38(3):867-76.
16. Wadsworth M, Kuh D, Richards M, Hardy R. Cohort Profile: The 1946 National Birth Cohort (MRC National Survey of Health and Development). *International Journal of Epidemiology*. 2006;35(1):49-54.
17. Wadsworth MEJ, Vinall LE, Jones AL, Hardy RJ, Whitehouse DB, Butterworth SL, et al. Alpha1-Antitrypsin as a Risk for Infant and Adult Respiratory Outcomes in a National Birth Cohort. *American Journal of Respiratory Cell and Molecular Biology*. 2004;31(5):559-64.
18. StataCorp. Stata Statistical Software: Release 13. College Station, TX: StataCorp LP; 2013.
